# Supplementary material for: Electronic origins of the stereochemistry in β-lactam formed through the Staudinger reaction catalyzed by a nucleophile
Source: Royal Society of Chemistry journal article supplement (doi:10.1039/d3ra05286a), 2023-01-01
Supplement: d3ra05286a1.pdf [file d3ra05286a1.pdf]

## Electronic Supplementary Information

### Electronic Origins of Stereochemistry in $\beta$ -Lactam Formation through Staudinger Reaction Catalyzed by a Nucleophile

Farideh Pahlavan, Sedigheh Sadat Moosavi, Amin Reza Zolghadr,\* Nasser Iranpour\*

Department of Chemistry, Shiraz University, Shiraz, 71946-84795, Iran

\*Corresponding author: [arzolghadr@shirazu.ac.ir](mailto:arzolghadr@shirazu.ac.ir); Tel: +98 713 613 7157, Fax: +98 713 646 0788, ORCID: 0000-0002-6289-3794 (A.R.Z), Nasser Iranpour, E-mail: [iranpour@shirazu.ac.ir](mailto:iranpour@shirazu.ac.ir)

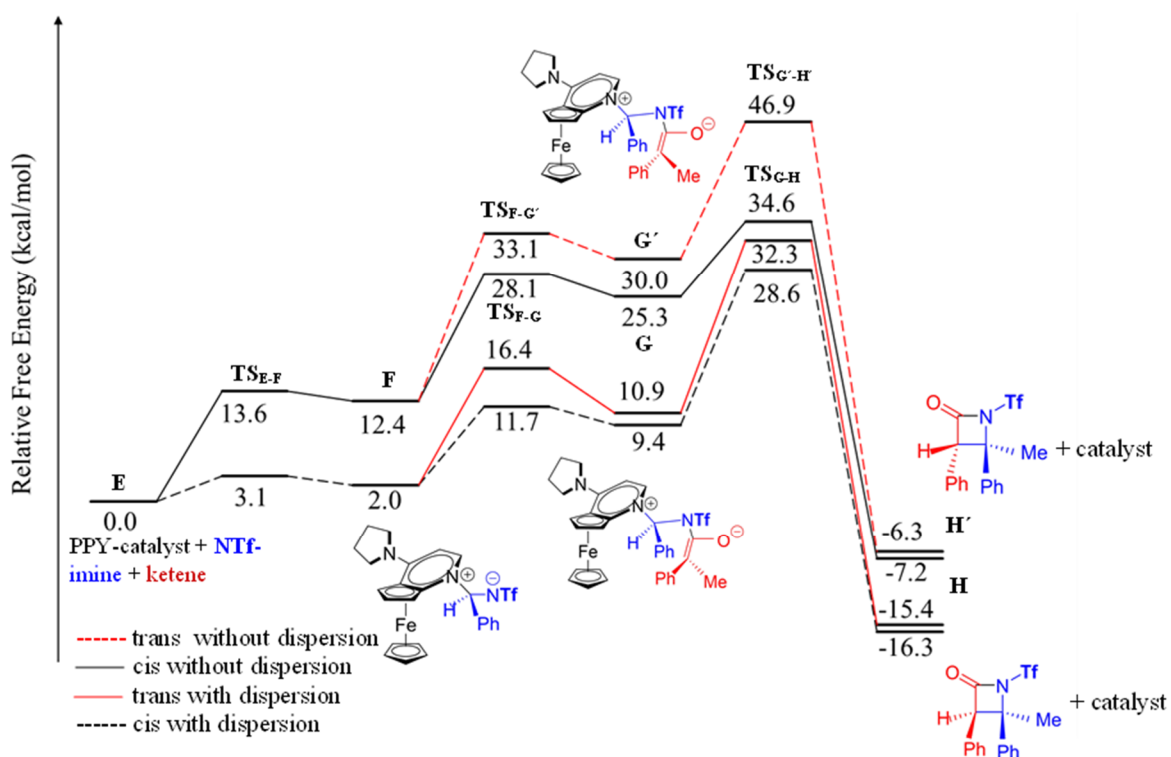

**Fig. S1** Gibbs free energy profile for the imine-first mechanism with and without dispersion corrections, comparing cis and trans selectivity of N-Tf imine.

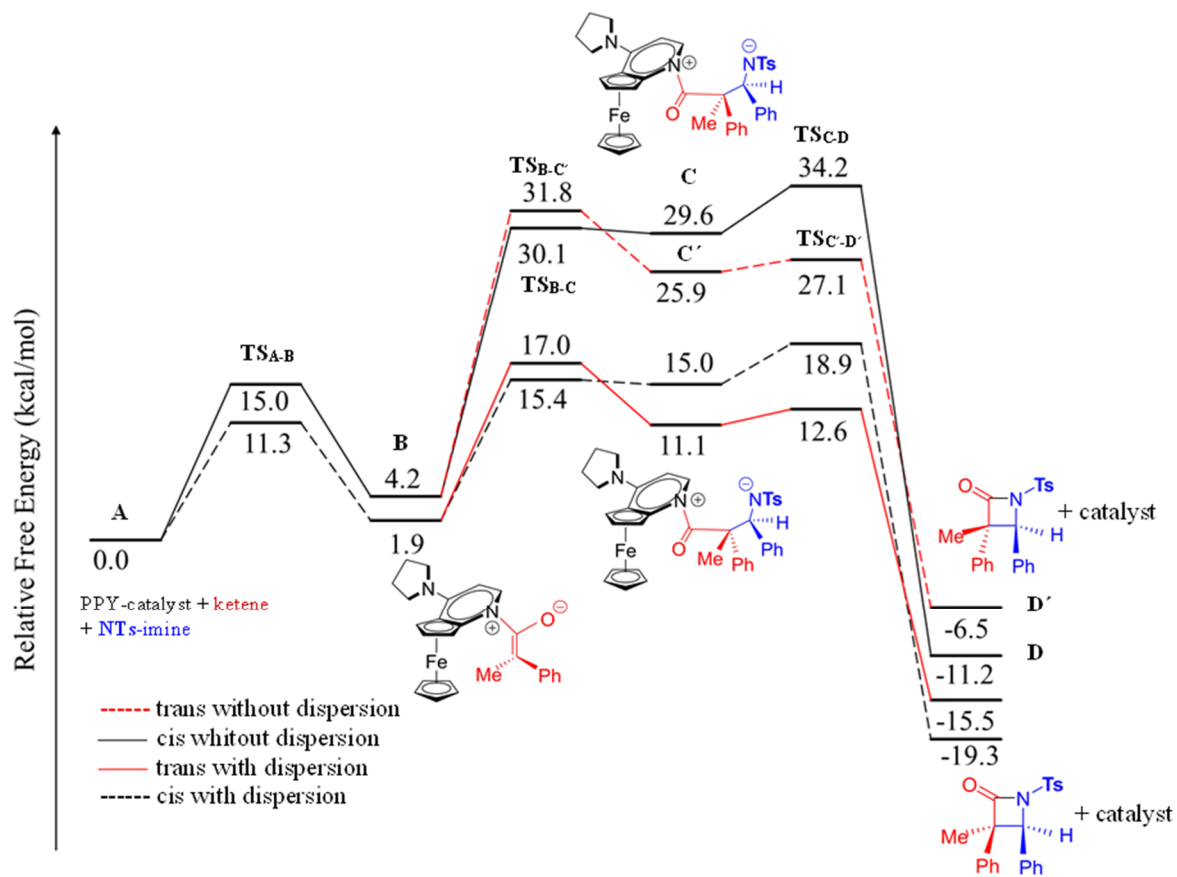

**Fig. S2** Gibbs free energy profile for the ketene-first mechanism with and without dispersion corrections, comparing cis and trans selectivity of N-Ts imine.

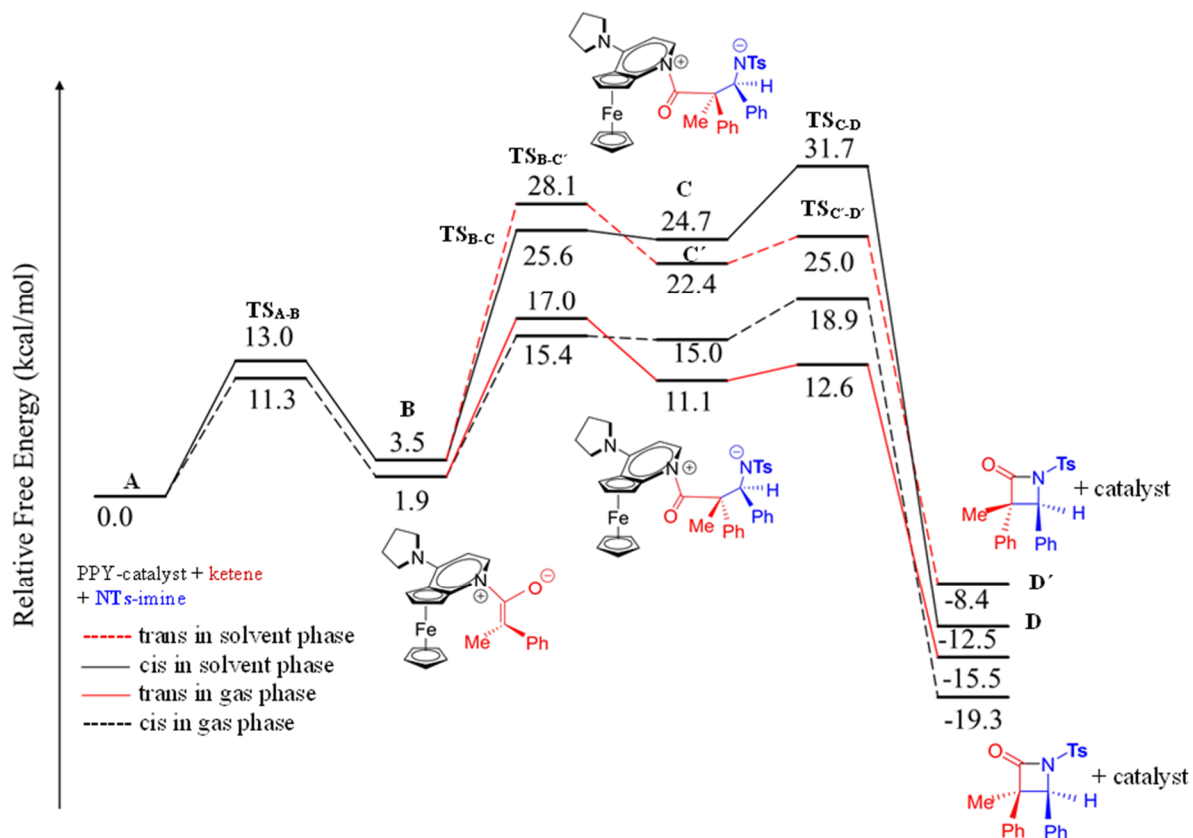

**Fig. S3** Gibbs free energy profile for the ketene-first mechanism in gas and solvent (toluene) phase, comparing cis and trans selectivity of N-Ts imine.

**Table S1.** Optimized energies of reactants, intermediates, and products for the competing mechanisms of cycloaddition-catalyzed Staudinger reaction between ketene and N-Ts imine.

| Name of molecules | Opt and Freq without dispersion for N-Ts, ketene-first (Hartree) | Opt and Freq with dispersion for N-Ts, ketene-first (Hartree) | Opt and Freq with dispersion for N-Ts, ketene-first in solvent phase (Hartree) |
|-------------------|------------------------------------------------------------------|---------------------------------------------------------------|--------------------------------------------------------------------------------|
| Reactants         | -2655.011729                                                     | -2655.193217                                                  | -2635.312746                                                                   |
| Intermediate-B    | -2655.004973                                                     | -2655.190269                                                  | -2635.307168                                                                   |
| Intermediate-C    | -2654.964499                                                     | -2655.169312                                                  | -2635.273384                                                                   |
| Intermediate-C`   | -2654.970511                                                     | -2655.175527                                                  | -2635.277049                                                                   |
| TSA-B             | -2654.987763                                                     | -2655.175208                                                  | -2635.292029                                                                   |
| TSB-C             | -2654.963732                                                     | -2655.176642                                                  | -2635.271949                                                                   |
| TSB-C`            | -2654.961048                                                     | -2655.166103                                                  | -2635.267965                                                                   |
| TSC-D             | -2654.957243                                                     | -2655.163025                                                  | -2635.262228                                                                   |
| TSC`-D`           | -2654.968506                                                     | -2655.173100                                                  | -2635.272906                                                                   |
| Catal+product-D   | -2655.029491                                                     | -2655.223910                                                  | -2635.332666                                                                   |
| Catal+product-D`  | -2655.022172                                                     | -2655.217848                                                  | -2635.326291                                                                   |

**Table S2.** Optimized energies of reactants, intermediates, and products for the ketene-first mechanism of nucleophile-catalyzed Staudinger reaction involving N-Tf imine.

| Name of molecules | Opt and Freq without dispersion for N-Tf, imine-first (Hartree) | Opt and Freq with dispersion for N-Tf, imine-first (Hartree) |
|-------------------|-----------------------------------------------------------------|--------------------------------------------------------------|
| Reactants         | -2721.761756                                                    | -2721.930808                                                 |
| Intermediate-F    | -2721.742033                                                    | -2721.925885                                                 |
| Intermediate-G    | -2721.721492                                                    | -2721.915780                                                 |
| Intermediate-G`   | -2721.713921                                                    | -2721.913348                                                 |
| TSE-F             | -2721.740128                                                    | -2721.925978                                                 |
| TSF-G             | -2721.717004                                                    | -2721.912138                                                 |
| TSF-G`            | -2721.709054                                                    | -2721.904684                                                 |
| TSG-H             | -2721.706676                                                    | -2721.885248                                                 |
| TSG`-H`           | -2721.687089                                                    | -2721.879332                                                 |
| Catal+product-H   | -2721.773150                                                    | -2721.955397                                                 |
| Catal+product-H`  | -2721.771727                                                    | -2721.956774                                                 |

continued

| Name of molecules | Opt and Freq without dispersion for N-Tf, ketene-first (Hartree) | Opt and Freq with dispersion for N-Tf, ketene-first (Hartree) |
|-------------------|------------------------------------------------------------------|---------------------------------------------------------------|
| Reactants         | -2721.761756                                                     | -2721.930808                                                  |
| Intermediate-J    | -2721.750431                                                     | -2721.927334                                                  |
| Intermediate-K    | -2721.724645                                                     | -2721.916946                                                  |
| Intermediate-K`   | -2721.732160                                                     | -2721.922293                                                  |
| TSE-J             | -2721.746368                                                     | -2721.917550                                                  |
| TSJ-K             | -2721.719600                                                     | -2721.910708                                                  |
| TSJ-K`            | -2721.720711                                                     | -2721.911900                                                  |
| TSK-L             | -2721.715227                                                     | -2721.909790                                                  |
| TSK-L`            | -2721.724689                                                     | -2721.915725                                                  |
| Catal+product-L   | -2721.773150                                                     | -2721.956619                                                  |
| Catal+product-L`  | -2721.771727                                                     | -2721.958543                                                  |

Optimized molecular structure of reactants, intermediates, and products for the competing mechanisms of cycloaddition-catalyzed Staudinger reaction between ketene and NTs-imine.

#### A. PPY-catalyst + ketene + N-Ts imine

```
%nprocshared=16
%mem=800MB
# opt=modredundant freq=noraman b3lyp/gen pseudo=read
```

Title Card Required

```
0 1
C      -5.95098200   -1.96733800   -0.73282100
C      -5.87688400   -0.62866800   -0.21319400
C      -5.09105600   -0.66181500    0.98489500
C      -5.21815000   -2.83000200    0.15468600
C      -4.68432400   -2.02328500    1.21159800
Fe     -3.97867500   -1.35655600   -0.63155800
C       0.85828500   -4.70460000    0.55994500
C       0.85995200   -4.30467300    2.04313400
C       0.48363800   -2.81970300    1.99795600
N      -0.39530500   -2.70968200    0.82134800
C      -0.32420700   -3.91439700   -0.02126500
C      -0.95985400   -1.52369600    0.46375000
C      -0.70281900   -0.34500200    1.18096100
C      -1.22487800    0.89751300    0.75965100
N      -2.00237900    1.10484200   -0.28947200
C      -2.32031300   -0.03058900   -0.98852600
C      -1.84060600   -1.36922900   -0.67485600
H       0.74907300   -5.78215300    0.40187400
```

|   |             |             |             |
|---|-------------|-------------|-------------|
| H | 1.79116600  | -4.38095400 | 0.08702900  |
| H | 0.10392700  | -4.87420500 | 2.59829900  |
| H | 1.82899300  | -4.45949000 | 2.52480700  |
| H | -0.04560000 | -2.48769200 | 2.89919700  |
| H | 1.37664600  | -2.19303700 | 1.87562900  |
| H | -1.25968000 | -4.48963000 | 0.04369800  |
| H | -0.16310100 | -3.64448100 | -1.06844500 |
| H | -0.03907300 | -0.35539000 | 2.03579600  |
| H | -0.95099600 | 1.78429700  | 1.33124500  |
| C | -3.20798100 | -1.49156600 | -2.54780900 |
| H | -3.77467800 | -1.88774700 | -3.38079800 |
| C | -2.42905900 | -2.26854200 | -1.64000700 |
| H | -2.29837200 | -3.33782600 | -1.69939000 |
| C | -3.18640400 | -0.13127000 | -2.12566800 |
| H | -3.70607600 | 0.69918800  | -2.58437100 |
| C | -6.71367100 | -2.39945900 | -1.95312700 |
| H | -7.74813200 | -2.67328600 | -1.70122000 |
| H | -6.76090600 | -1.60166400 | -2.70156000 |
| H | -6.25328900 | -3.27101200 | -2.43059000 |
| C | -5.08710800 | -4.32140800 | 0.02454600  |
| H | -5.90945400 | -4.83867700 | 0.53912900  |
| H | -5.10840400 | -4.64066200 | -1.02280400 |
| H | -4.15105300 | -4.68550800 | 0.46111900  |
| C | -3.88905600 | -2.51056800 | 2.38919900  |
| H | -4.54184300 | -2.71211700 | 3.25045200  |
| H | -3.35297100 | -3.43716400 | 2.16104000  |
| H | -3.14611800 | -1.77116000 | 2.70568300  |
| C | -4.77842000 | 0.50409200  | 1.87765600  |
| H | -5.50373200 | 0.57900000  | 2.70043100  |
| H | -3.78197400 | 0.41332300  | 2.32124500  |
| H | -4.80122800 | 1.44863600  | 1.32650500  |
| C | -6.53504500 | 0.58609300  | -0.80366600 |
| H | -6.63563900 | 0.50334100  | -1.89081200 |
| H | -7.54363700 | 0.73228600  | -0.39162200 |
| H | -5.95950300 | 1.49330100  | -0.59542100 |
| C | -0.76679500 | 5.87124300  | -1.26222700 |
| O | -0.19038300 | 6.42696900  | -2.12458700 |
| C | -1.43058400 | 5.22778400  | -0.31588900 |
| C | -0.93627900 | 5.20499200  | 1.07563200  |
| C | -1.64518200 | 4.49863000  | 2.06336700  |
| C | 0.23705700  | 5.88347000  | 1.46247700  |
| C | -1.19548300 | 4.47292800  | 3.38553600  |
| H | -2.54961300 | 3.96085100  | 1.79942000  |
| C | 0.68087400  | 5.85410700  | 2.78007100  |
| H | 0.80724900  | 6.44063700  | 0.72189700  |
| C | -0.03290600 | 5.14826600  | 3.75413800  |
| H | -1.76357400 | 3.91889900  | 4.12855700  |
| H | 1.58929600  | 6.38707800  | 3.04914400  |
| H | 0.31431700  | 5.12734200  | 4.78329200  |
| C | -2.72538900 | 4.53887800  | -0.73025900 |
| H | -2.65449200 | 3.45410300  | -0.57784600 |
| H | -3.56865800 | 4.93123600  | -0.14772400 |
| H | -2.94604700 | 4.71583500  | -1.78777100 |
| S | 4.29145600  | -2.00912200 | 0.33011400  |

|   |             |             |             |
|---|-------------|-------------|-------------|
| O | 3.98187000  | -2.04150500 | 1.76458400  |
| O | 3.99352900  | -3.17083300 | -0.51701900 |
| N | 3.37717200  | -0.72718200 | -0.30018800 |
| C | 3.93681300  | 0.27373300  | -0.88166400 |
| H | 5.02609800  | 0.34632900  | -0.98995000 |
| C | 3.17258500  | 1.38336600  | -1.44340700 |
| C | 3.86425600  | 2.41213100  | -2.10558700 |
| C | 1.77177900  | 1.44526100  | -1.33327000 |
| C | 3.16686600  | 3.48622700  | -2.65280200 |
| H | 4.94800600  | 2.36424200  | -2.18805100 |
| C | 1.07924000  | 2.52159100  | -1.87627800 |
| H | 1.24539500  | 0.65386300  | -0.81025900 |
| C | 1.77512400  | 3.54199600  | -2.53767300 |
| H | 3.70429300  | 4.28030100  | -3.16345700 |
| H | -0.00031100 | 2.56500400  | -1.76935400 |
| H | 1.23435300  | 4.38859400  | -2.95030300 |
| C | 8.05291300  | -0.64607300 | 1.02444500  |
| C | 6.69688600  | -0.93104100 | 1.16770900  |
| C | 6.03975400  | -1.63638100 | 0.15556000  |
| C | 6.72352600  | -2.05666300 | -0.98769000 |
| C | 8.08048000  | -1.76197700 | -1.11290300 |
| C | 8.76540900  | -1.05610400 | -0.11321700 |
| H | 8.56897200  | -0.10101600 | 1.81105100  |
| H | 6.15224300  | -0.62848600 | 2.05609500  |
| H | 6.19956000  | -2.61824200 | -1.75414100 |
| H | 8.61759000  | -2.09041800 | -1.99918200 |
| C | 10.24247800 | -0.76897400 | -0.24087900 |
| H | 10.50263400 | 0.19748300  | 0.20372800  |
| H | 10.83587700 | -1.53446100 | 0.27637300  |
| H | 10.56128500 | -0.76083600 | -1.28797900 |

B 15 54 F  
B 56 76 F

Fe 0  
LANL2DZ  
\*\*\*\*  
H C O N S 0  
6-31G\*  
\*\*\*\*

Fe 0  
LANL2DZ

**TS<sub>A-B</sub>**

%nprocshared=16  
%mem=800MB  
# opt=(modredundant,ts,calcfc,noeigen) freq=noraman b3lyp/gen pseudo=read

Title Card Required

|     |             |             |             |
|-----|-------------|-------------|-------------|
| O 1 |             |             |             |
| C   | -3.62344300 | -1.05464500 | -2.95354900 |

|    |             |             |             |
|----|-------------|-------------|-------------|
| C  | -3.36201300 | 0.35929100  | -2.94310800 |
| C  | -4.28842200 | 0.97178900  | -2.03854200 |
| C  | -4.72154900 | -1.31149600 | -2.06118500 |
| C  | -5.12612000 | -0.06158100 | -1.49070100 |
| Fe | -3.13148000 | -0.44926800 | -1.03892100 |
| C  | -5.54166500 | -2.05141800 | 4.14024300  |
| C  | -6.41876700 | -0.79192400 | 4.18758900  |
| C  | -5.46292300 | 0.30935000  | 3.71465700  |
| N  | -4.56909300 | -0.38001800 | 2.77171300  |
| C  | -4.69376000 | -1.84335100 | 2.87679800  |
| C  | -3.63974400 | 0.28845200  | 2.03778100  |
| C  | -3.43278800 | 1.66885400  | 2.21649700  |
| C  | -2.41010400 | 2.34655700  | 1.53664400  |
| N  | -1.60992500 | 1.80304800  | 0.63288000  |
| C  | -1.79795000 | 0.46711600  | 0.37842400  |
| C  | -2.78379800 | -0.35238200 | 1.06462800  |
| H  | -6.11705700 | -2.98072600 | 4.10246900  |
| H  | -4.89261400 | -2.09308100 | 5.02268400  |
| H  | -7.25847600 | -0.88625700 | 3.48886700  |
| H  | -6.82824600 | -0.58598700 | 5.18036900  |
| H  | -5.98192800 | 1.13607800  | 3.21703000  |
| H  | -4.88831200 | 0.73040100  | 4.55327500  |
| H  | -5.19701200 | -2.25410000 | 1.99038700  |
| H  | -3.70872200 | -2.31014900 | 2.95735800  |
| H  | -4.00628000 | 2.22322500  | 2.94764200  |
| H  | -2.21789200 | 3.39194700  | 1.76582900  |
| C  | -1.58233600 | -1.68500000 | -0.40656400 |
| H  | -1.23785200 | -2.54663500 | -0.96266200 |
| C  | -2.65131300 | -1.69054900 | 0.53507300  |
| H  | -3.23133400 | -2.56017400 | 0.80031000  |
| C  | -1.08804800 | -0.35764200 | -0.54449400 |
| H  | -0.28757400 | -0.02483600 | -1.18841000 |
| C  | -2.92553100 | -2.07275700 | -3.80977600 |
| H  | -3.41542400 | -2.16650100 | -4.78909800 |
| H  | -1.88163900 | -1.79909400 | -3.99412100 |
| H  | -2.93239900 | -3.06520400 | -3.34732600 |
| C  | -5.35874100 | -2.64897800 | -1.81157300 |
| H  | -6.16099600 | -2.84654900 | -2.53615200 |
| H  | -4.63426200 | -3.46534300 | -1.89807200 |
| H  | -5.80299100 | -2.70611600 | -0.81209500 |
| C  | -6.26929700 | 0.16125100  | -0.54221600 |
| H  | -7.18773900 | 0.42313000  | -1.08612100 |
| H  | -6.48636900 | -0.73303900 | 0.05096100  |
| H  | -6.05748000 | 0.97920400  | 0.15422800  |
| C  | -4.42560500 | 2.44006100  | -1.75499300 |
| H  | -5.27041100 | 2.86771100  | -2.31285800 |
| H  | -4.60227600 | 2.63660900  | -0.69206800 |
| H  | -3.52881100 | 2.99192200  | -2.04692400 |
| C  | -2.33006700 | 1.06933900  | -3.77303600 |
| H  | -1.46421600 | 0.42983600  | -3.97159800 |
| H  | -2.74512500 | 1.36985100  | -4.74518500 |
| H  | -1.96281200 | 1.97343800  | -3.27840500 |
| C  | 0.23908600  | 2.48629300  | 0.48150900  |
| O  | 0.92861500  | 1.58282600  | 0.87058500  |



|   |             |             |             |
|---|-------------|-------------|-------------|
| C | 0.19324000  | 3.77309700  | 0.04006800  |
| C | 1.42266200  | 4.57855100  | 0.20288500  |
| C | 1.57743200  | 5.79495400  | -0.49923500 |
| C | 2.47014100  | 4.21505600  | 1.08099000  |
| C | 2.71805100  | 6.58439300  | -0.35161700 |
| H | 0.79897300  | 6.12944200  | -1.17648700 |
| C | 3.60683700  | 5.00655700  | 1.22598700  |
| H | 2.37990100  | 3.30632600  | 1.66666200  |
| C | 3.74728800  | 6.19833100  | 0.50760100  |
| H | 2.79824100  | 7.51076100  | -0.91622700 |
| H | 4.38636700  | 4.69214000  | 1.91620900  |
| H | 4.63388900  | 6.81546400  | 0.62517600  |
| C | -0.97970000 | 4.38946900  | -0.68039500 |
| H | -1.30060400 | 5.33380800  | -0.21709800 |
| H | -0.72929000 | 4.62551000  | -1.72563100 |
| H | -1.83000600 | 3.71014100  | -0.70253800 |
| S | 6.21772500  | -2.00808300 | 1.43627900  |
| O | 5.81896500  | -1.71529200 | 2.81518900  |
| O | 7.55781200  | -2.51006200 | 1.12598100  |
| N | 5.14651700  | -3.23784500 | 0.91236000  |
| C | 4.19882700  | -2.97748700 | 0.08808300  |
| H | 4.05123700  | -1.98381200 | -0.34966700 |
| C | 3.24765300  | -4.00885400 | -0.34528600 |
| C | 2.28542600  | -3.68151600 | -1.31313000 |
| C | 3.28567800  | -5.31305300 | 0.17794900  |
| C | 1.37713700  | -4.64182900 | -1.75820200 |
| H | 2.25732700  | -2.67296200 | -1.71919100 |
| C | 2.37431100  | -6.26671400 | -0.26268600 |
| H | 4.03502100  | -5.55385500 | 0.92506200  |
| C | 1.41974600  | -5.93458900 | -1.23165200 |
| H | 0.64464500  | -4.38535800 | -2.51901000 |
| H | 2.40610200  | -7.27330000 | 0.14494900  |
| H | 0.71349500  | -6.68513300 | -1.57671300 |
| C | 4.59880500  | 1.38991200  | -0.08936500 |
| C | 4.83609800  | 0.28133900  | 0.71887100  |
| C | 5.92635800  | -0.54978500 | 0.43675100  |
| C | 6.78255400  | -0.27209700 | -0.63050900 |
| C | 6.54347800  | 0.85671200  | -1.41423700 |
| C | 5.45032600  | 1.69769400  | -1.16337500 |
| H | 3.74359700  | 2.02520800  | 0.11821100  |
| H | 4.18813800  | 0.06747900  | 1.56319700  |
| H | 7.62881000  | -0.92292700 | -0.82280800 |
| H | 7.21878700  | 1.08826800  | -2.23441500 |
| C | 5.17769900  | 2.90582600  | -2.02741500 |
| H | 4.94858800  | 3.78641000  | -1.41758800 |
| H | 6.03229500  | 3.14043700  | -2.67010300 |
| H | 4.30909300  | 2.73505100  | -2.67667400 |

H C O N S 0  
6-31G\*  
\*\*\*\*  
Fe 0  
LANL2DZ  
\*\*\*\*

Fe 0  
LANL2DZ

## Intermediate B

nprocshared=16  
%mem=800MB  
# opt=(modredundant) freq=noraman b3lyp/gen pseudo=read

Title Card Required

```
0 1
C      4.87986700    1.66431900    1.17225800
C      4.17718200    2.48424300    0.22319400
C      4.12952400    1.77431500   -1.01951900
C      5.27728700    0.45275100    0.50796600
C      4.80477200    0.51674700   -0.84300500
Fe     3.21161600    0.64828300    0.49146500
C      2.13527100   -4.93535700   -1.39304400
C      2.17782600   -4.55910200   -2.88033400
C      1.48007900   -3.19621600   -2.90339700
N      1.85009900   -2.58587100   -1.61158200
C      2.38155700   -3.60019400   -0.67698300
C      1.41916200   -1.36032300   -1.25927300
C      0.62697000   -0.58549300   -2.14499300
C      0.01000800    0.58660400   -1.73253800
N      0.18835800    1.14806200   -0.53085700
C      1.06378500    0.51886900    0.33472900
C      1.67751900   -0.75939100    0.03179900
H      2.87421800   -5.69287900   -1.11617700
H      1.14013100   -5.30303500   -1.12601800
H      3.21391100   -4.46081600   -3.22712900
H      1.67360000   -5.28566100   -3.52334900
H      1.80818800   -2.56356100   -3.73489600
H      0.38888200   -3.30669100   -2.95191100
H      3.45192900   -3.42498400   -0.50349200
H      1.84645700   -3.54807900    0.27139300
H      0.37562100   -0.96073700   -3.12687600
H     -0.70965900    1.08796800   -2.37117100
C      2.27034900   -0.11104700    2.17913100
H      2.72810000   -0.10262100    3.15943500
C      2.44856500   -1.12669000    1.19723200
H      3.04852300   -2.01283400    1.32684100
C      1.45380600    0.92509100    1.63990400
H      1.14055500    1.83563600    2.12963600
C      5.20587300    2.04370800    2.58872200
H      6.15015300    2.60368700    2.63875100
H      4.42859100    2.67792000    3.02688100
H      5.31649200    1.16349800    3.23020400
C      6.08087000   -0.66156100    1.11595500
H      7.15818900   -0.46717500    1.02112500
H      5.86548600   -0.78325800    2.18268000
H      5.87905800   -1.61999600    0.62662500
```

|   |             |             |             |
|---|-------------|-------------|-------------|
| C | 5.03102700  | -0.50396700 | -1.92147000 |
| H | 5.93034000  | -0.26559600 | -2.50665200 |
| H | 5.16793000  | -1.50926800 | -1.51013700 |
| H | 4.18870300  | -0.54215700 | -2.61949100 |
| C | 3.55537600  | 2.26624600  | -2.31774700 |
| H | 4.35690300  | 2.55828200  | -3.01043600 |
| H | 2.95588600  | 1.49675100  | -2.81602900 |
| H | 2.91661200  | 3.14079500  | -2.17298600 |
| C | 3.64529500  | 3.86470000  | 0.48365300  |
| H | 3.34016600  | 3.98779800  | 1.52730300  |
| H | 4.41161000  | 4.62436200  | 0.27507700  |
| H | 2.77645500  | 4.09193700  | -0.13954100 |
| C | -0.96627800 | 2.02651000  | 0.08256700  |
| O | -1.65438200 | 1.33661600  | 0.86643900  |
| C | -1.03265600 | 3.32728700  | -0.37658400 |
| C | -2.15440300 | 4.19691000  | 0.01601300  |
| C | -2.30811900 | 5.47497500  | -0.57544500 |
| C | -3.13006800 | 3.83027900  | 0.97869400  |
| C | -3.36219600 | 6.32284800  | -0.23765900 |
| H | -1.59525700 | 5.81578100  | -1.31878600 |
| C | -4.18033000 | 4.68289600  | 1.31054700  |
| H | -3.03832500 | 2.86903900  | 1.46708600  |
| C | -4.31266600 | 5.93696000  | 0.70804400  |
| H | -3.43777500 | 7.29442800  | -0.72193500 |
| H | -4.90442600 | 4.36160500  | 2.05688500  |
| H | -5.13444800 | 6.59777900  | 0.97196700  |
| C | 0.00458700  | 3.90677000  | -1.31065900 |
| H | -0.39904600 | 4.14430700  | -2.30807100 |
| H | 0.41698300  | 4.84795500  | -0.91769800 |
| H | 0.84157700  | 3.22283100  | -1.45458900 |
| S | -2.14136500 | -3.68424100 | 0.15955800  |
| O | -2.74995000 | -5.01583300 | 0.17509600  |
| O | -0.72457300 | -3.53525100 | -0.22708400 |
| N | -3.03093600 | -2.78609400 | -0.98328300 |
| C | -3.31067800 | -1.55048700 | -0.75505200 |
| H | -3.03312400 | -1.03766200 | 0.17123000  |
| C | -4.00228000 | -0.71007800 | -1.73253500 |
| C | -4.09777000 | 0.66739700  | -1.46567400 |
| C | -4.55423700 | -1.23584100 | -2.91513600 |
| C | -4.73409400 | 1.51147500  | -2.37588200 |
| H | -3.65239100 | 1.06969200  | -0.55842900 |
| C | -5.19489600 | -0.38997000 | -3.81311600 |
| H | -4.47600200 | -2.30189500 | -3.10468400 |
| C | -5.28458500 | 0.98317500  | -3.54537000 |
| H | -4.79554600 | 2.57538800  | -2.16655300 |
| H | -5.62876700 | -0.79459500 | -4.72358300 |
| H | -5.78627700 | 1.63882800  | -4.25250700 |
| C | -3.44974600 | -3.00852600 | 3.93034500  |
| C | -3.25099600 | -3.57302900 | 2.67193900  |
| C | -2.36318800 | -2.95886500 | 1.78463300  |
| C | -1.68576100 | -1.78849500 | 2.14149200  |
| C | -1.91667700 | -1.22697000 | 3.39524400  |
| C | -2.79241200 | -1.82900000 | 4.31022200  |
| H | -4.13374800 | -3.48770400 | 4.62658300  |

|   |             |             |            |
|---|-------------|-------------|------------|
| H | -3.76358500 | -4.48160000 | 2.37543500 |
| H | -1.01044400 | -1.29720900 | 1.45133400 |
| H | -1.41944600 | -0.29481600 | 3.64803300 |
| C | -3.01080300 | -1.22504500 | 5.67707200 |
| H | -3.95779600 | -1.55545400 | 6.11568300 |
| H | -2.20901900 | -1.51622500 | 6.36880700 |
| H | -3.01803600 | -0.13079300 | 5.63191500 |

B 56 76 F

H C O N S 0

6-31G\*

\*\*\*\*

Fe 0

LANL2DZ

\*\*\*\*

Fe 0

LANL2DZ

**TS<sub>B-C'</sub>**

%nprocshared=16

%mem=1GB

# freq=noraman b3lyp/gen pseudo=read

Title Card Required

0 1

|    |            |             |             |
|----|------------|-------------|-------------|
| C  | 4.54981300 | -2.63308600 | -1.08499500 |
| C  | 3.52088800 | -2.86137900 | -0.10791900 |
| C  | 3.76143300 | -1.98272700 | 0.99768700  |
| C  | 5.43412900 | -1.62175000 | -0.57414300 |
| C  | 4.94304400 | -1.21555500 | 0.70860400  |
| Fe | 3.50615700 | -0.87549600 | -0.75980200 |
| C  | 4.99639800 | 4.75226900  | 0.41516700  |
| C  | 4.76112400 | 4.57022700  | 1.92138000  |
| C  | 3.47786200 | 3.73428600  | 1.96985100  |
| N  | 3.55044700 | 2.90314300  | 0.75283000  |
| C  | 4.58737000 | 3.39428000  | -0.17353600 |
| C  | 2.63625000 | 1.94403700  | 0.48454800  |
| C  | 1.52576700 | 1.75566600  | 1.33495900  |
| C  | 0.48890900 | 0.89762000  | 1.00649600  |
| N  | 0.50548200 | 0.07781600  | -0.05521900 |
| C  | 1.60774300 | 0.14614700  | -0.90194600 |
| C  | 2.68474900 | 1.09172600  | -0.68121300 |
| H  | 6.02817300 | 5.01474400  | 0.16513100  |
| H  | 4.34336500 | 5.54024500  | 0.02292800  |
| H  | 5.59107600 | 4.01388000  | 2.37293100  |
| H  | 4.65605900 | 5.51576600  | 2.46002000  |
| H  | 3.41584100 | 3.10112500  | 2.86096600  |
| H  | 2.58130100 | 4.36897600  | 1.94150400  |
| H  | 5.43744800 | 2.69945400  | -0.19873700 |

|   |             |             |             |
|---|-------------|-------------|-------------|
| H | 4.18429600  | 3.48415700  | -1.18495000 |
| H | 1.37517800  | 2.39254200  | 2.19515400  |
| H | -0.42855800 | 0.91780500  | 1.58243900  |
| C | 3.09260800  | -0.08688800 | -2.63473300 |
| H | 3.56308200  | -0.44190200 | -3.54192000 |
| C | 3.61816200  | 0.91280200  | -1.77104700 |
| H | 4.54310200  | 1.44224900  | -1.93094800 |
| C | 1.88290200  | -0.59639800 | -2.08286500 |
| H | 1.24920400  | -1.35875200 | -2.50636500 |
| C | 4.71055500  | -3.37358400 | -2.38231300 |
| H | 5.29862300  | -4.29100700 | -2.24085700 |
| H | 3.74415000  | -3.66789800 | -2.80355100 |
| H | 5.22846600  | -2.76878800 | -3.13364400 |
| C | 6.68169700  | -1.12085200 | -1.24419300 |
| H | 7.55410300  | -1.72049800 | -0.94958200 |
| H | 6.60667000  | -1.17285000 | -2.33510600 |
| H | 6.89693200  | -0.08118700 | -0.97628100 |
| C | 5.59216900  | -0.22945300 | 1.63790500  |
| H | 6.26105200  | -0.73842600 | 2.34613000  |
| H | 6.19682600  | 0.50422000  | 1.09443600  |
| H | 4.85135200  | 0.31875300  | 2.22891500  |
| C | 2.98272400  | -1.91857500 | 2.28020000  |
| H | 3.47978200  | -2.50574300 | 3.06503300  |
| H | 2.88923900  | -0.89196800 | 2.64968300  |
| H | 1.97308600  | -2.31798000 | 2.16259700  |
| C | 2.42549300  | -3.88381000 | -0.21335500 |
| H | 2.13274500  | -4.05746800 | -1.25316400 |
| H | 2.74993100  | -4.84831800 | 0.20137200  |
| H | 1.52785100  | -3.57864500 | 0.33128200  |
| C | -0.75987800 | -0.60754400 | -0.56992000 |
| O | -0.94847800 | -0.43996500 | -1.76603400 |
| C | -1.55556700 | -1.35616100 | 0.37426100  |
| C | -2.44632300 | -2.37388200 | -0.27549200 |
| C | -2.60012400 | -3.66184000 | 0.28174500  |
| C | -3.20214600 | -2.09874500 | -1.43918400 |
| C | -3.44572100 | -4.61597400 | -0.28596000 |
| H | -2.05528800 | -3.93760800 | 1.17646700  |
| C | -4.05219800 | -3.05075900 | -1.99970700 |
| H | -3.11754700 | -1.13200400 | -1.91515100 |
| C | -4.18254100 | -4.31987100 | -1.43163400 |
| H | -3.52659400 | -5.59623900 | 0.17826000  |
| H | -4.61798500 | -2.79304100 | -2.89210700 |
| H | -4.84487000 | -5.06027900 | -1.87267600 |
| C | -0.88901300 | -1.84072100 | 1.65760200  |
| H | -1.63773200 | -2.19309900 | 2.37027400  |
| H | -0.20379500 | -2.68082100 | 1.46985100  |
| H | -0.31833700 | -1.06952100 | 2.17240800  |
| S | -2.45588700 | 2.59113800  | 0.26886300  |
| O | -2.68535200 | 3.83079800  | 1.02597400  |
| O | -1.20887200 | 2.48665000  | -0.52217200 |
| N | -2.57358600 | 1.36047700  | 1.37267200  |
| C | -3.05470700 | 0.15612500  | 1.03822800  |
| H | -3.55314300 | 0.01072400  | 0.07838300  |
| C | -3.65555500 | -0.61743900 | 2.16202800  |

|   |             |             |             |
|---|-------------|-------------|-------------|
| C | -4.63014600 | -1.59570300 | 1.90919300  |
| C | -3.32420400 | -0.32667500 | 3.49723400  |
| C | -5.24321100 | -2.27785800 | 2.96196600  |
| H | -4.91717600 | -1.81558400 | 0.88652300  |
| C | -3.92990300 | -1.01478100 | 4.54532600  |
| H | -2.60778100 | 0.46370000  | 3.69443900  |
| C | -4.89110100 | -1.99640900 | 4.28230700  |
| H | -5.99968800 | -3.02765700 | 2.74563000  |
| H | -3.66257900 | -0.77659400 | 5.57195100  |
| H | -5.36896100 | -2.52756600 | 5.10164500  |
| C | -6.13943100 | 2.75284100  | -1.44561900 |
| C | -5.08817200 | 2.87830500  | -0.54149300 |
| C | -3.81688400 | 2.42140000  | -0.90117600 |
| C | -3.59270100 | 1.84971100  | -2.15455800 |
| C | -4.65924800 | 1.73248200  | -3.04909000 |
| C | -5.94291100 | 2.17918400  | -2.71214000 |
| H | -7.12899400 | 3.10945500  | -1.16791700 |
| H | -5.23927100 | 3.33821500  | 0.42981900  |
| H | -2.59783200 | 1.50513700  | -2.41710500 |
| H | -4.48746300 | 1.28772800  | -4.02669500 |
| C | -7.08834400 | 2.07129300  | -3.69180100 |
| H | -8.00118400 | 1.71171100  | -3.20287700 |
| H | -7.32418600 | 3.04767900  | -4.13557400 |
| H | -6.85120500 | 1.38607700  | -4.51194900 |

H C O N S O

6-31G\*

\*\*\*\*

Fe 0

LANL2DZ

\*\*\*\*

Fe 0

LANL2DZ

## Intermediate C

%nprocshared=16

%mem=800MB

# freq=noraman b3lyp/gen pseudo=read

Title Card Required

0 1

|    |            |             |             |
|----|------------|-------------|-------------|
| C  | 5.27179900 | 1.78496000  | -1.27536000 |
| C  | 4.01296700 | 2.17868100  | -1.84427100 |
| C  | 3.38359200 | 1.00692700  | -2.38084000 |
| C  | 5.42245600 | 0.36749800  | -1.46508900 |
| C  | 4.25580400 | -0.11129200 | -2.14799500 |
| Fe | 3.72360100 | 0.77875000  | -0.33712700 |
| C  | 4.38220500 | -4.63254700 | 1.96128100  |
| C  | 3.74188800 | -5.29358300 | 0.73249000  |

|   |             |             |             |
|---|-------------|-------------|-------------|
| C | 2.55819100  | -4.37332100 | 0.41942400  |
| N | 3.02541600  | -3.03498900 | 0.84826900  |
| C | 4.25076700  | -3.13191400 | 1.66502100  |
| C | 2.32044500  | -1.91802300 | 0.59347000  |
| C | 1.05311000  | -2.00094300 | -0.03021700 |
| C | 0.24430100  | -0.90401100 | -0.22002300 |
| N | 0.59326300  | 0.36227000  | 0.13865900  |
| C | 1.88678700  | 0.55661900  | 0.66857600  |
| C | 2.75159900  | -0.58299100 | 0.94777600  |
| H | 5.42263600  | -4.92819000 | 2.12153300  |
| H | 3.81686900  | -4.88519500 | 2.86555900  |
| H | 4.44653100  | -5.30092300 | -0.10757000 |
| H | 3.42269700  | -6.32323100 | 0.91301200  |
| H | 2.29775900  | -4.36092800 | -0.64265100 |
| H | 1.66108900  | -4.65487000 | 0.98571900  |
| H | 5.11389000  | -2.75942800 | 1.09776400  |
| H | 4.15012000  | -2.53447000 | 2.57397400  |
| H | 0.61295900  | -2.95404000 | -0.29194800 |
| H | -0.80742000 | -1.05126600 | -0.52662300 |
| C | 3.79710900  | 1.35145800  | 1.67210400  |
| H | 4.53590000  | 2.03156200  | 2.07466500  |
| C | 3.95472700  | -0.05208100 | 1.54484800  |
| H | 4.82651600  | -0.60609600 | 1.85162100  |
| C | 2.54473800  | 1.73961500  | 1.11730100  |
| H | 2.17364200  | 2.74462000  | 1.02300400  |
| C | 6.28674500  | 2.70060400  | -0.65207200 |
| H | 6.99554500  | 3.06976700  | -1.40607600 |
| H | 5.81654600  | 3.57559900  | -0.19299100 |
| H | 6.87112100  | 2.19342900  | 0.12254200  |
| C | 6.62246800  | -0.44912700 | -1.07640400 |
| H | 7.37083200  | -0.45886600 | -1.88086400 |
| H | 7.11205700  | -0.04993700 | -0.18226800 |
| H | 6.35504700  | -1.49116800 | -0.87135600 |
| C | 4.00285700  | -1.52210200 | -2.59652800 |
| H | 4.35118000  | -1.67391300 | -3.62728700 |
| H | 4.52510700  | -2.24883000 | -1.96592200 |
| H | 2.93619700  | -1.76590800 | -2.57204900 |
| C | 2.07981200  | 0.97133500  | -3.12553600 |
| H | 2.24433400  | 1.10739400  | -4.20343500 |
| H | 1.56055800  | 0.01615600  | -2.99655000 |
| H | 1.40538200  | 1.76595000  | -2.79456200 |
| C | 3.45831000  | 3.57381700  | -1.90517600 |
| H | 3.89666300  | 4.21571200  | -1.13494600 |
| H | 3.67423900  | 4.03680500  | -2.87781700 |
| H | 2.37393700  | 3.58259100  | -1.76206500 |
| C | -0.27188700 | 1.51583500  | -0.09628500 |
| O | 0.29489300  | 2.58266600  | -0.20234700 |
| C | -1.81762400 | 1.41088700  | -0.29308700 |
| S | -3.37072300 | -2.22419200 | 0.30173800  |
| O | -2.64524500 | -3.41596300 | -0.19653800 |
| O | -3.93445900 | -2.26349600 | 1.66993800  |
| N | -2.42667300 | -0.96976200 | -0.00256900 |
| C | -5.77401900 | -2.11343300 | -3.00038900 |
| C | -4.69256800 | -2.32862300 | -2.15063500 |

|   |             |             |             |
|---|-------------|-------------|-------------|
| C | -4.80514500 | -2.02530300 | -0.78924400 |
| C | -6.00127300 | -1.51046100 | -0.28906100 |
| C | -7.07897200 | -1.29456100 | -1.15270600 |
| C | -6.98531200 | -1.59112400 | -2.51691800 |
| H | -5.68340700 | -2.35933800 | -4.05707900 |
| H | -3.76394000 | -2.74764000 | -2.52551700 |
| H | -6.08409400 | -1.30452200 | 0.77315400  |
| H | -8.01058500 | -0.89579000 | -0.75596900 |
| C | -8.16034500 | -1.38479000 | -3.44539300 |
| H | -7.85429200 | -0.90343400 | -4.38215500 |
| H | -8.63012700 | -2.34036200 | -3.71501800 |
| H | -8.93150400 | -0.76015300 | -2.98247400 |
| C | -2.67053400 | 0.33389300  | 0.55528700  |
| C | -2.40566000 | 2.80853000  | 0.01791600  |
| C | -3.43925700 | 3.33620900  | -0.76896300 |
| C | -2.00199900 | 3.55272900  | 1.13863900  |
| C | -4.03817100 | 4.56041200  | -0.46047000 |
| H | -3.79785000 | 2.79314900  | -1.63572700 |
| C | -2.59246700 | 4.77695000  | 1.44730100  |
| H | -1.21778400 | 3.17678400  | 1.78497800  |
| C | -3.61492900 | 5.29091800  | 0.64787500  |
| H | -4.83686100 | 4.93790300  | -1.09386000 |
| H | -2.25298400 | 5.32668200  | 2.32139000  |
| H | -4.07588600 | 6.24528600  | 0.88862700  |
| H | -3.70061000 | 0.67370200  | 0.34773600  |
| C | -2.47700000 | 0.46160300  | 2.07491000  |
| C | -3.33956100 | 1.26893900  | 2.82826600  |
| C | -1.46763000 | -0.23398300 | 2.75318200  |
| C | -3.18036600 | 1.40811000  | 4.20820900  |
| H | -4.15096900 | 1.79089000  | 2.32818100  |
| C | -1.29811900 | -0.09288500 | 4.13085600  |
| H | -0.84618200 | -0.93398300 | 2.20533400  |
| C | -2.14974800 | 0.73531300  | 4.86530400  |
| H | -3.86840000 | 2.03587200  | 4.76926900  |
| H | -0.51309200 | -0.65078100 | 4.63648200  |
| H | -2.02488900 | 0.83680400  | 5.94054800  |
| C | -1.98183900 | 1.08701500  | -1.80946400 |
| H | -3.02585400 | 0.85553500  | -2.03247900 |
| H | -1.66124100 | 1.94318900  | -2.41241800 |
| H | -1.40849500 | 0.20861000  | -2.10431200 |

Fe 0  
LANL2DZ  
\*\*\*\*  
H C O N S 0  
6-31G\*  
\*\*\*\*

Fe 0  
LANL2DZ

**Intermediate C'**



```
%nprocshared=16
%mem=1GB
# freq=noraman b3lyp/gen pseudo=read
```

Title Card Required

```
0 1
C      5.18210800   -1.98648000    0.47512300
C      3.96400100   -2.15840800    1.21866400
C      3.73371700   -0.96102800    1.97083600
C      5.70861000   -0.68347200    0.77781400
C      4.81008200   -0.04793500    1.69508400
Fe     3.82482500   -0.52592300   -0.07831900
C      4.36765000    5.33093400   -0.94156200
C      3.80808700    5.65708900    0.45030700
C      2.65644300    4.65739000    0.60240700
N      3.10513100    3.47886300   -0.16747700
C      4.27282100    3.80039000   -1.01013200
C      2.40100800    2.32922700   -0.19605300
C      1.14949600    2.23597600    0.45786800
C      0.30695000    1.15329100    0.29087500
N      0.65937300    0.04400000   -0.39580600
C      1.93364200    0.00623300   -0.96395700
C      2.82184800    1.15028200   -0.92040500
H      5.39078500    5.68587200   -1.09314600
H      3.73652500    5.77815600   -1.71789400
H      4.56852400    5.47760800    1.21961000
H      3.46792200    6.69136900    0.54776700
H      2.46698600    4.38153000    1.64449200
H      1.72200000    5.04857000    0.17823900
H      5.17683300    3.32730900   -0.60377500
H      4.11958900    3.43681500   -2.02861500
H      0.73111500    3.09058700    0.97041100
H     -0.74166600    1.17596100    0.59161900
C      3.81481600   -0.54144700   -2.15493500
H      4.52915800   -1.10035300   -2.74450500
C      4.00587500    0.77775100   -1.66129900
H      4.88521200    1.37779800   -1.83021700
C      2.56319900   -1.03920100   -1.69182000
H      2.13971400   -2.00950400   -1.90183100
C      5.82353700   -3.01739200   -0.40944700
H      6.44331400   -3.70813800    0.17864800
H      5.07688400   -3.61883600   -0.93788900
H      6.47290400   -2.55901500   -1.16193700
C      6.99622400   -0.11044700    0.25767900
H      7.84337700   -0.40422500    0.89252600
H      7.21438900   -0.45738400   -0.75748700
H      6.97192000    0.98405100    0.23512200
C      4.99888900    1.29570100    2.33983200
H      5.56464000    1.20260900    3.27737400
H      5.55419000    1.98486000    1.69484200
H      4.04100000    1.76499000    2.58603000
C      2.62500000   -0.71612400    2.95422700
H      2.99053600   -0.82871200    3.98427400
```

|   |             |             |             |
|---|-------------|-------------|-------------|
| H | 2.20815500  | 0.29236300  | 2.86347900  |
| H | 1.80326900  | -1.42348000 | 2.82265400  |
| C | 3.11930300  | -3.40049600 | 1.23485200  |
| H | 3.18125500  | -3.94267700 | 0.28649500  |
| H | 3.44743200  | -4.08718700 | 2.02742200  |
| H | 2.06393800  | -3.17558000 | 1.41190100  |
| C | -0.38872900 | -0.88913800 | -0.96678500 |
| O | -0.31988200 | -1.04373700 | -2.15538700 |
| C | -1.36113800 | -1.66121900 | -0.04523300 |
| C | -1.38290300 | -3.12860400 | -0.52541000 |
| C | -1.00379700 | -4.18529800 | 0.31630200  |
| C | -1.79444900 | -3.45627400 | -1.83158200 |
| C | -1.03408200 | -5.51322600 | -0.12046300 |
| H | -0.68770600 | -3.98973400 | 1.33434800  |
| C | -1.82482400 | -4.77953900 | -2.26886800 |
| H | -2.08259700 | -2.67008100 | -2.51788600 |
| C | -1.44471300 | -5.81828100 | -1.41579200 |
| H | -0.73882600 | -6.30632500 | 0.56203300  |
| H | -2.14975400 | -4.99738700 | -3.28302800 |
| H | -1.47208500 | -6.84981500 | -1.75718700 |
| C | -0.99164300 | -1.54487700 | 1.43902000  |
| H | -1.66228000 | -2.16735300 | 2.03527500  |
| H | 0.03795300  | -1.86182400 | 1.63253100  |
| H | -1.11482300 | -0.51958100 | 1.78604600  |
| S | -3.00349600 | 1.60209700  | -1.08360400 |
| O | -2.11358500 | 2.77965900  | -0.92310900 |
| O | -3.22519700 | 1.06607100  | -2.44961600 |
| N | -2.48756500 | 0.49795600  | -0.04060000 |
| C | -2.77842200 | -0.89627500 | -0.29980700 |
| H | -3.02121600 | -1.07275600 | -1.35485100 |
| C | -3.89897200 | -1.47616700 | 0.56467400  |
| C | -4.59331000 | -2.63251100 | 0.17789000  |
| C | -4.26968600 | -0.84806600 | 1.76166300  |
| C | -5.61506600 | -3.15540300 | 0.97255500  |
| H | -4.33850200 | -3.12444100 | -0.75622100 |
| C | -5.28905800 | -1.36961800 | 2.55941900  |
| H | -3.76499500 | 0.07296500  | 2.03376100  |
| C | -5.96360200 | -2.52886000 | 2.17079200  |
| H | -6.14426100 | -4.04891400 | 0.64982200  |
| H | -5.56489900 | -0.86246000 | 3.48114600  |
| H | -6.76231200 | -2.93282600 | 2.78821200  |
| C | -5.98189100 | 3.54815800  | 0.92445800  |
| C | -4.72823800 | 3.13685100  | 0.47583600  |
| C | -4.63221800 | 2.17975000  | -0.53738200 |
| C | -5.79133200 | 1.64656200  | -1.10241900 |
| C | -7.04127400 | 2.06547800  | -0.64483000 |
| C | -7.15881600 | 3.01583200  | 0.37753400  |
| H | -6.05051600 | 4.30238800  | 1.70639100  |
| H | -3.82088300 | 3.56932000  | 0.88508600  |
| H | -5.70567700 | 0.92690700  | -1.90973700 |
| H | -7.94125800 | 1.65142000  | -1.09519700 |
| C | -8.51504900 | 3.44416200  | 0.88956700  |
| H | -8.50445100 | 4.48413100  | 1.23500100  |
| H | -9.28364200 | 3.35373900  | 0.11413900  |

H -8.83652000 2.82443800 1.73814700

Fe 0  
LANL2DZ  
\*\*\*\*

H C O N S 0  
6-31G\*  
\*\*\*\*

Fe 0  
LANL2DZ

**TS<sub>c-d</sub>**

nprocshared=16  
%mem=800MB  
# opt=(ts,calcfc,noeigen) freq=noraman b3lyp/gen pseudo=read

Title Card Required

0 1  
C -4.37824200 2.07552400 1.75916000  
C -3.12250100 1.75318200 2.37859900  
C -3.04478400 0.32805000 2.50362000  
C -5.08873200 0.84849800 1.52347800  
C -4.25951800 -0.22936000 1.97194600  
Fe -3.29069000 0.86374100 0.48463500  
C -5.70468000 -3.33657900 -2.92292000  
C -5.31761700 -4.44748000 -1.93635900  
C -3.90628000 -4.04151000 -1.49693900  
N -3.92476400 -2.56896900 -1.55865500  
C -5.10721000 -2.07367300 -2.28595800  
C -2.86500600 -1.82097500 -1.16701900  
C -1.66563100 -2.43141400 -0.74655000  
C -0.50047400 -1.69791800 -0.53351300  
N -0.44821800 -0.36455000 -0.57089800  
C -1.63309200 0.31172100 -0.81887600  
C -2.85567500 -0.37585600 -1.18956300  
H -6.78372300 -3.24881200 -3.07782800  
H -5.23788400 -3.51799000 -3.89793500  
H -5.99646600 -4.44792300 -1.07513900  
H -5.33817500 -5.44637200 -2.38042100  
H -3.66316200 -4.37899900 -0.48405100  
H -3.14179900 -4.44113000 -2.17838300  
H -5.81774200 -1.60495900 -1.59138800  
H -4.81578600 -1.33036900 -3.03190800  
H -1.57145500 -3.50844400 -0.72169000  
H 0.44614800 -2.21298700 -0.41026300  
C -3.20214800 1.91321900 -1.30917900  
H -3.67793700 2.87441800 -1.45195400  
C -3.83158900 0.64894300 -1.48320400  
H -4.85614800 0.50634200 -1.78790700  
C -1.86854500 1.71482000 -0.85222300  
H -1.14024100 2.48270700 -0.63556200

|   |             |             |             |
|---|-------------|-------------|-------------|
| C | -4.88744400 | 3.46317800  | 1.49115300  |
| H | -5.41522100 | 3.86523400  | 2.36737400  |
| H | -4.07027300 | 4.15338100  | 1.25819500  |
| H | -5.58959800 | 3.48427700  | 0.65138800  |
| C | -6.47638300 | 0.72810900  | 0.96070600  |
| H | -7.23081900 | 0.79243800  | 1.75702500  |
| H | -6.69489800 | 1.52459400  | 0.24179700  |
| H | -6.62590600 | -0.22958600 | 0.45086500  |
| C | -4.61257200 | -1.68905500 | 1.98395400  |
| H | -5.06503700 | -1.97418800 | 2.94413600  |
| H | -5.33047600 | -1.94415100 | 1.19806200  |
| H | -3.72607500 | -2.31597900 | 1.84259400  |
| C | -1.95637600 | -0.47844300 | 3.15394100  |
| H | -2.30442200 | -0.89895700 | 4.10731600  |
| H | -1.63806600 | -1.31565000 | 2.52290500  |
| H | -1.07170400 | 0.12538400  | 3.36597400  |
| C | -2.12945200 | 2.76572700  | 2.87509200  |
| H | -1.95314900 | 3.56041200  | 2.14298400  |
| H | -2.49200400 | 3.24114900  | 3.79700600  |
| H | -1.16271700 | 2.31067900  | 3.10181100  |
| C | 0.92035700  | 0.41585100  | -1.02077000 |
| O | 0.84852400  | 0.72530500  | -2.18989000 |
| C | 1.63254700  | 1.23873000  | 0.12005700  |
| C | 1.62562300  | 2.75621200  | -0.09686000 |
| C | 1.48683500  | 3.64092700  | 0.98838200  |
| C | 1.78240500  | 3.32792800  | -1.37442400 |
| C | 1.50432400  | 5.02664100  | 0.81282400  |
| H | 1.36821600  | 3.25920500  | 1.99564000  |
| C | 1.79367400  | 4.71153800  | -1.55134800 |
| H | 1.87981400  | 2.68188900  | -2.23466400 |
| C | 1.65650500  | 5.57147800  | -0.46099200 |
| H | 1.40070800  | 5.67613800  | 1.67874900  |
| H | 1.91621800  | 5.11619000  | -2.55279800 |
| H | 1.67096400  | 6.64929100  | -0.60187700 |
| C | 1.07491400  | 0.84230600  | 1.49481600  |
| H | 1.69081500  | 1.25807700  | 2.29820500  |
| H | 0.04887500  | 1.19375000  | 1.62702200  |
| H | 1.09079400  | -0.24387800 | 1.59537600  |
| S | 3.12058400  | -2.12631300 | -0.94406300 |
| O | 2.07867600  | -3.17452000 | -1.06713700 |
| O | 4.08244700  | -1.99168000 | -2.05213200 |
| N | 2.33198200  | -0.75734900 | -0.52452800 |
| C | 3.00427200  | 0.46098500  | -0.05150600 |
| H | 3.45007500  | 0.31263500  | 0.94325900  |
| C | 4.06961400  | 1.11250000  | -0.92037400 |
| C | 5.07575500  | 1.85716900  | -0.28930700 |
| C | 4.08407800  | 1.01682500  | -2.31855700 |
| C | 6.06495800  | 2.50662500  | -1.02916700 |
| H | 5.08414100  | 1.92897000  | 0.79683500  |
| C | 5.07420900  | 1.66193900  | -3.05988500 |
| H | 3.32716100  | 0.42602800  | -2.81889300 |
| C | 6.06580900  | 2.41061300  | -2.42148100 |
| H | 6.83517300  | 3.07946600  | -0.51837800 |
| H | 5.07494500  | 1.57047500  | -4.14312400 |

|   |            |             |             |
|---|------------|-------------|-------------|
| H | 6.83799900 | 2.90708700  | -3.00402800 |
| C | 4.10682700 | -2.52462900 | 0.51761400  |
| C | 3.52568500 | -3.22566800 | 1.57692800  |
| C | 5.44235000 | -2.12426100 | 0.58460100  |
| C | 4.28679400 | -3.51926900 | 2.70645900  |
| H | 2.49578900 | -3.55843500 | 1.49765300  |
| C | 6.19081600 | -2.42136300 | 1.72436200  |
| H | 5.88798800 | -1.60434400 | -0.25691800 |
| C | 5.62781600 | -3.11762500 | 2.80213100  |
| H | 3.83715900 | -4.07793100 | 3.52473600  |
| H | 7.23351200 | -2.11503000 | 1.77172300  |
| C | 6.43799100 | -3.41559100 | 4.04262400  |
| H | 7.50486900 | -3.50610200 | 3.81247000  |
| H | 6.33313100 | -2.61551600 | 4.78818900  |
| H | 6.11356800 | -4.34696900 | 4.51931700  |

H C O N S O

6-31G\*

\*\*\*\*

Fe 0

LANL2DZ

\*\*\*\*

Fe 0

LANL2DZ

**TSC'D'**

%nprocshared=16

%mem=1GB

# freq=noraman b3lyp/gen pseudo=read

Title Card Required

0 1

|    |            |             |             |
|----|------------|-------------|-------------|
| C  | 4.96920500 | -1.91239700 | 0.83842600  |
| C  | 3.72216400 | -2.14000600 | 1.51555100  |
| C  | 3.35455600 | -0.92575900 | 2.18157900  |
| C  | 5.37977500 | -0.55972900 | 1.10049000  |
| C  | 4.37830200 | 0.05015400  | 1.92192100  |
| Fe | 3.54787100 | -0.59270200 | 0.12067500  |
| C  | 4.70181700 | 5.01047600  | -1.32791200 |
| C  | 4.15604900 | 5.52317900  | 0.01270100  |
| C  | 2.89381400 | 4.67813300  | 0.21565400  |
| N  | 3.22154900 | 3.39350200  | -0.42582000 |
| C  | 4.42603100 | 3.50089800  | -1.26789300 |
| C  | 2.39074200 | 2.32455700  | -0.36281300 |
| C  | 1.13007900 | 2.42600800  | 0.26028700  |
| C  | 0.18729300 | 1.40397700  | 0.17048800  |
| N  | 0.42547300 | 0.21224700  | -0.37591200 |
| C  | 1.69930800 | -0.01028800 | -0.86944900 |
| C  | 2.69901200 | 1.03909600  | -0.94671300 |

|   |             |             |             |
|---|-------------|-------------|-------------|
| H | 5.76279600  | 5.22943300  | -1.47753900 |
| H | 4.14482700  | 5.45838100  | -2.15889500 |
| H | 4.87445800  | 5.32604800  | 0.81735700  |
| H | 3.93891800  | 6.59480300  | 0.01025400  |
| H | 2.65050500  | 4.52659400  | 1.27264500  |
| H | 2.01972900  | 5.13532900  | -0.27010600 |
| H | 5.26546500  | 2.96148800  | -0.80846300 |
| H | 4.24305400  | 3.07245600  | -2.25639100 |
| H | 0.80540900  | 3.35995600  | 0.69806600  |
| H | -0.83438300 | 1.55469000  | 0.49318800  |
| C | 3.53493000  | -0.88219200 | -1.93757400 |
| H | 4.19740800  | -1.57423400 | -2.44007100 |
| C | 3.84888300  | 0.46665200  | -1.61000100 |
| H | 4.78280200  | 0.95567600  | -1.83690300 |
| C | 2.23874900  | -1.19650000 | -1.44044600 |
| H | 1.72042200  | -2.13852300 | -1.53833700 |
| C | 5.75103900  | -2.93600000 | 0.06486000  |
| H | 6.40543900  | -3.51603300 | 0.73058800  |
| H | 5.09517700  | -3.64756100 | -0.44667000 |
| H | 6.38966100  | -2.47044500 | -0.69275200 |
| C | 6.66281100  | 0.07216000  | 0.64079800  |
| H | 7.48793300  | -0.16911500 | 1.32522100  |
| H | 6.95496400  | -0.27645700 | -0.35540600 |
| H | 6.58607800  | 1.16387300  | 0.60066100  |
| C | 4.40827900  | 1.43840000  | 2.49469000  |
| H | 4.83456800  | 1.43546300  | 3.50770600  |
| H | 5.01501600  | 2.11855000  | 1.88826600  |
| H | 3.40162100  | 1.86330600  | 2.56521900  |
| C | 2.17718800  | -0.70526200 | 3.08846500  |
| H | 2.50192400  | -0.65286500 | 4.13694700  |
| H | 1.65373400  | 0.22995000  | 2.86138100  |
| H | 1.44799800  | -1.51474200 | 3.01383200  |
| C | 2.99219200  | -3.45174500 | 1.56736100  |
| H | 3.09892800  | -4.01108900 | 0.63284100  |
| H | 3.38468500  | -4.08456800 | 2.37571100  |
| H | 1.92215300  | -3.31846400 | 1.74644400  |
| C | -0.80305900 | -0.68821400 | -1.09046800 |
| O | -0.59132600 | -0.78743700 | -2.27859400 |
| C | -1.45230400 | -1.81039300 | -0.19220800 |
| C | -1.35584200 | -3.20294200 | -0.81521100 |
| C | -0.86932900 | -4.30789900 | -0.09902100 |
| C | -1.77959100 | -3.42128100 | -2.14091800 |
| C | -0.80811300 | -5.58042100 | -0.67470100 |
| H | -0.54064700 | -4.19183600 | 0.92773700  |
| C | -1.71739300 | -4.68913700 | -2.71643400 |
| H | -2.13554300 | -2.58645800 | -2.73265800 |
| C | -1.23229800 | -5.77760500 | -1.98717400 |
| H | -0.43264600 | -6.41572100 | -0.08854200 |
| H | -2.04908200 | -4.82490000 | -3.74266100 |
| H | -1.18844200 | -6.76611500 | -2.43733500 |
| C | -0.94548100 | -1.75898600 | 1.24911000  |
| H | -1.50355500 | -2.45288000 | 1.88451700  |
| H | 0.11589000  | -2.01648100 | 1.29489600  |
| H | -1.06813600 | -0.75899000 | 1.66842800  |

|   |             |             |             |
|---|-------------|-------------|-------------|
| S | -3.05495400 | 1.23211100  | -1.60959800 |
| O | -2.06383500 | 2.28262800  | -1.90347500 |
| O | -3.68981200 | 0.47339900  | -2.70419900 |
| N | -2.32774300 | 0.23739300  | -0.49365000 |
| C | -2.86671500 | -1.12744200 | -0.32036700 |
| H | -3.33164000 | -1.48241400 | -1.24651000 |
| C | -3.83678300 | -1.34932200 | 0.82262100  |
| C | -4.59462100 | -2.53007800 | 0.85355100  |
| C | -3.98770200 | -0.43006400 | 1.86792500  |
| C | -5.47205000 | -2.79022200 | 1.90650600  |
| H | -4.49490700 | -3.24843100 | 0.04313000  |
| C | -4.87052000 | -0.68498400 | 2.91926600  |
| H | -3.42423100 | 0.49672900  | 1.83639000  |
| C | -5.61282200 | -1.86693000 | 2.94557900  |
| H | -6.05108500 | -3.71037900 | 1.91159700  |
| H | -4.98122400 | 0.04499900  | 3.71758300  |
| H | -6.30104100 | -2.06421500 | 3.76364100  |
| C | -5.18490200 | 3.77544100  | 0.75631000  |
| C | -4.14203500 | 3.16226900  | 0.06396400  |
| C | -4.40425300 | 2.03556700  | -0.71742400 |
| C | -5.70229200 | 1.53422500  | -0.82143700 |
| C | -6.73586500 | 2.15800500  | -0.12405200 |
| C | -6.49508200 | 3.28067700  | 0.68002900  |
| H | -4.98234900 | 4.65906200  | 1.35784900  |
| H | -3.13468500 | 3.56424600  | 0.10172500  |
| H | -5.89456700 | 0.67638600  | -1.45672900 |
| H | -7.74804200 | 1.76910900  | -0.21001200 |
| C | -7.61712500 | 3.93069200  | 1.45585000  |
| H | -7.39281200 | 4.97766800  | 1.68582000  |
| H | -8.56006600 | 3.90032000  | 0.89891100  |
| H | -7.78928200 | 3.41556800  | 2.41066000  |

H C O N S 0

6-31G\*

\*\*\*\*

Fe 0

LANL2DZ

\*\*\*\*

Fe 0

LANL2DZ

## Product D + catalyst

%nprocshared=16

%mem=800MB

# opt freq=noraman b3lyp/gen pseudo=read

Title Card Required

0 1

|    |             |             |             |
|----|-------------|-------------|-------------|
| C  | 4.71080200  | -2.91420600 | -1.26004600 |
| C  | 3.50026800  | -3.39973400 | -0.65550900 |
| C  | 3.39637500  | -2.82324500 | 0.65248500  |
| C  | 5.36214100  | -2.04523500 | -0.31677200 |
| C  | 4.54742400  | -1.98544500 | 0.86057200  |
| Fe | 3.46785300  | -1.32924300 | -0.79369800 |
| C  | 5.63869900  | 4.00997800  | 0.61543900  |
| C  | 5.48743700  | 3.73542500  | 2.11881200  |
| C  | 4.11529100  | 3.05713700  | 2.20640300  |
| N  | 4.00367000  | 2.32640900  | 0.93894500  |
| C  | 5.00996200  | 2.76844600  | -0.03657400 |
| C  | 2.95804800  | 1.48279600  | 0.68203200  |
| C  | 1.90071400  | 1.33671300  | 1.58791800  |
| C  | 0.80178500  | 0.49008900  | 1.30635300  |
| N  | 0.64807400  | -0.24237200 | 0.21816300  |
| C  | 1.67036200  | -0.14105100 | -0.68725100 |
| C  | 2.84859200  | 0.70071800  | -0.52990200 |
| H  | 6.67608700  | 4.16087200  | 0.30266900  |
| H  | 5.07111800  | 4.90624000  | 0.33774000  |
| H  | 6.26914900  | 3.04627600  | 2.46027100  |
| H  | 5.54456800  | 4.63913200  | 2.73226100  |
| H  | 4.03652000  | 2.36922200  | 3.05574900  |
| H  | 3.30667100  | 3.79862600  | 2.30445100  |
| H  | 5.76330600  | 1.98577300  | -0.20448500 |
| H  | 4.54605200  | 3.00036500  | -0.99989800 |
| H  | 1.87945900  | 1.90157400  | 2.51162400  |
| H  | -0.01101900 | 0.45048800  | 2.02981200  |
| C  | 2.98124700  | -0.39009000 | -2.57662400 |
| H  | 3.34661000  | -0.72546100 | -3.53887100 |
| C  | 3.66654400  | 0.50885800  | -1.70654600 |
| H  | 4.61511700  | 0.97301600  | -1.92711700 |
| C  | 1.78922600  | -0.83288600 | -1.93653000 |
| H  | 1.07120000  | -1.54433900 | -2.32157100 |
| C  | 5.24175500  | -3.30999700 | -2.60876400 |
| H  | 5.85749600  | -4.21810000 | -2.54125100 |
| H  | 4.43292900  | -3.51768500 | -3.31690900 |
| H  | 5.86831900  | -2.52525200 | -3.04526000 |
| C  | 6.68992200  | -1.37075500 | -0.51501800 |
| H  | 7.51774400  | -2.02110000 | -0.19878700 |
| H  | 6.86125300  | -1.11446500 | -1.56578400 |
| H  | 6.76378300  | -0.44599300 | 0.06665200  |
| C  | 4.84639800  | -1.22644700 | 2.12151900  |
| H  | 5.31372900  | -1.87744900 | 2.87362600  |
| H  | 5.53107600  | -0.39181800 | 1.93982900  |
| H  | 3.93380700  | -0.81273500 | 2.56331800  |
| C  | 2.30727000  | -3.07199000 | 1.65584200  |
| H  | 2.62448800  | -3.80620600 | 2.40978900  |
| H  | 2.02580600  | -2.15479000 | 2.18276300  |
| H  | 1.40311900  | -3.45969700 | 1.17744500  |
| C  | 2.53441100  | -4.36914400 | -1.27583000 |
| H  | 2.52325100  | -4.28470200 | -2.36739100 |
| H  | 2.80105100  | -5.40672200 | -1.03036900 |
| H  | 1.51244200  | -4.20003100 | -0.92281600 |
| C  | -3.78223900 | -0.70816100 | -1.09218700 |



|   |             |             |             |
|---|-------------|-------------|-------------|
| S | -3.35505000 | 2.21626100  | 1.31311300  |
| O | -4.63887300 | 2.69594400  | 1.81641100  |
| O | -2.26985000 | 1.81231800  | 2.20882700  |
| N | -3.66565600 | 0.83001400  | 0.35188900  |
| C | -3.12955900 | 5.08043100  | -1.53967800 |
| C | -3.62932400 | 4.16428300  | -0.61724800 |
| C | -2.72751300 | 3.40589600  | 0.13390800  |
| C | -1.34756200 | 3.55102300  | -0.02308100 |
| C | -0.87110000 | 4.47598700  | -0.95067000 |
| C | -1.74901900 | 5.25336000  | -1.71951400 |
| H | -3.82480100 | 5.67047700  | -2.13160200 |
| H | -4.69640900 | 4.02688400  | -0.48716800 |
| H | -0.66320200 | 2.95627600  | 0.57256900  |
| H | 0.20209800  | 4.59432700  | -1.07894300 |
| C | -1.22218600 | 6.27252800  | -2.70190500 |
| H | -1.88221500 | 6.37003800  | -3.57027500 |
| H | -1.14816600 | 7.26491700  | -2.23726000 |
| H | -0.22324200 | 6.00440500  | -3.06099700 |
| C | -2.93065600 | -0.46493800 | 0.24379000  |
| C | -4.74445400 | -1.88091000 | -1.14018700 |
| C | -4.26217700 | -3.19184100 | -1.00308700 |
| C | -6.11078100 | -1.69009600 | -1.38643400 |
| C | -5.12476100 | -4.28246800 | -1.09883900 |
| H | -3.20766200 | -3.36071000 | -0.80386300 |
| C | -6.97445300 | -2.78413800 | -1.48398800 |
| H | -6.49817200 | -0.68428800 | -1.51371000 |
| C | -6.48630200 | -4.08249100 | -1.33993000 |
| H | -4.73314500 | -5.28956000 | -0.98148100 |
| H | -8.03126300 | -2.61605600 | -1.67452400 |
| H | -7.15911100 | -4.93274900 | -1.41456500 |
| H | -1.87263100 | -0.31166300 | 0.01088800  |
| C | -3.06634700 | -1.38999000 | 1.42389400  |
| C | -1.97078500 | -2.18827700 | 1.77934400  |
| C | -4.25261800 | -1.49052100 | 2.16277800  |
| C | -2.06532000 | -3.08493100 | 2.84572900  |
| H | -1.03945500 | -2.08377400 | 1.22738400  |
| C | -4.34321600 | -2.38146800 | 3.23117100  |
| H | -5.10172200 | -0.86302200 | 1.90882500  |
| C | -3.25224000 | -3.18507900 | 3.57297800  |
| H | -1.20676500 | -3.69504200 | 3.11510200  |
| H | -5.26715100 | -2.44686000 | 3.79961100  |
| H | -3.32552900 | -3.87757900 | 4.40758700  |
| C | -4.40640500 | 0.67721200  | -0.81669000 |
| O | -5.16990200 | 1.41832800  | -1.39046700 |
| C | -2.90484600 | -0.65562500 | -2.35673600 |
| H | -2.33267000 | -1.58341900 | -2.46087900 |
| H | -3.53655300 | -0.53880500 | -3.24305300 |
| H | -2.19922300 | 0.18189100  | -2.31850900 |

H C O N S O  
6-31G\*  
\*\*\*\*  
Fe 0  
LANL2DZ

\*\*\*\*

Fe 0  
LANL2DZ

### Product D' + catalyst

%nprocshared=16  
%mem=1GB  
# freq=noraman b3lyp/gen pseudo=read

Title Card Required

```
0 1
C      4.83244100    2.10226200    1.38302800
C      3.62529900    2.58878300    0.77226000
C      3.52835000    2.01262100   -0.53607200
C      5.48864600    1.23457000    0.44185200
C      4.68151400    1.17610800   -0.74061700
Fe     3.59182000    0.51854600    0.90553800
C      5.28478000   -4.91777200   -0.91049300
C      5.08463400   -4.55009200   -2.38804000
C      3.78649600   -3.73513500   -2.36304400
N      3.81893700   -3.06279500   -1.05926700
C      4.82573000   -3.65401100   -0.16622500
C      2.84485300   -2.17665300   -0.68651600
C      1.74549100   -1.91378400   -1.51015000
C      0.70863900   -1.04389500   -1.09848000
N      0.66233100   -0.37909500    0.04183700
C      1.73882300   -0.58440900    0.86378000
C      2.86061000   -1.46553600    0.57297700
H      6.31515000   -5.19206900   -0.66529500
H      4.63929400   -5.76291300   -0.64329400
H      5.91460900   -3.92626300   -2.74141700
H      5.01486900   -5.42115300   -3.04587200
H      3.73075100   -2.99999400   -3.17411900
H      2.90255900   -4.38683800   -2.44573100
H      5.66596700   -2.96230400   -0.00904600
H      4.39325800   -3.88623200    0.81135000
H      1.63009400   -2.42245200   -2.45881300
H     -0.14645600   -0.92604000   -1.76250400
C      3.19154300   -0.50629500    2.66271300
H      3.63949600   -0.24614900    3.61330200
C      3.76960600   -1.37898000    1.69349300
H      4.70826100   -1.89684900    1.81777200
C      1.97859100    0.02441700    2.13934300
H      1.32029300    0.73626400    2.61893500
C      5.35542100    2.49660700    2.73530400
H      5.96914500    3.40660800    2.67370900
H      4.54230600    2.69983700    3.43998700
H      5.98167500    1.71240500    3.17310100
C      6.81292600    0.55513100    0.64669500
```

|   |             |             |             |
|---|-------------|-------------|-------------|
| H | 7.64458000  | 1.19954400  | 0.32827800  |
| H | 6.98098500  | 0.30385200  | 1.69916400  |
| H | 6.88246100  | -0.37361200 | 0.07093100  |
| C | 4.99128600  | 0.41915300  | -2.00019600 |
| H | 5.47966200  | 1.06659200  | -2.74210700 |
| H | 5.66145100  | -0.42534700 | -1.81079100 |
| H | 4.08098500  | 0.01929300  | -2.45892100 |
| C | 2.43646800  | 2.25388300  | -1.53766300 |
| H | 2.70953100  | 3.05628100  | -2.23819100 |
| H | 2.22928500  | 1.35506100  | -2.12702200 |
| H | 1.50082000  | 2.53826900  | -1.04738800 |
| C | 2.65292700  | 3.55583900  | 1.38578100  |
| H | 2.63635700  | 3.47314000  | 2.47746200  |
| H | 2.91594600  | 4.59465300  | 1.14021200  |
| H | 1.63391900  | 3.38038700  | 1.02599000  |
| C | -2.83126500 | -1.83315100 | -0.57065500 |
| O | -2.34234600 | -2.67388100 | -1.26285000 |
| C | -3.43895700 | -1.75849700 | 0.84594200  |
| C | -4.63469000 | -2.68748400 | 1.03320800  |
| C | -4.83125900 | -3.41532900 | 2.21357000  |
| C | -5.59019400 | -2.81322000 | 0.00893900  |
| C | -5.94869000 | -4.23973600 | 2.37038800  |
| H | -4.11360800 | -3.34604100 | 3.02370500  |
| C | -6.70268200 | -3.63758300 | 0.16301000  |
| H | -5.46834400 | -2.26395800 | -0.92173400 |
| C | -6.88808100 | -4.35538900 | 1.34718800  |
| H | -6.07920000 | -4.79273100 | 3.29701300  |
| H | -7.42353200 | -3.72040000 | -0.64586100 |
| H | -7.75513800 | -4.99916600 | 1.46817400  |
| C | -2.34717000 | -1.89592300 | 1.91210300  |
| H | -2.71238900 | -1.57561500 | 2.89307100  |
| H | -2.02435000 | -2.93965300 | 1.97838100  |
| H | -1.47422800 | -1.28993500 | 1.65888600  |
| S | -3.50853900 | 0.33663000  | -2.27426900 |
| O | -2.63435200 | -0.27134900 | -3.27622300 |
| O | -4.97167300 | 0.28089800  | -2.39988200 |
| N | -3.08237800 | -0.38997900 | -0.78771200 |
| C | -3.85608100 | -0.26001300 | 0.48173900  |
| H | -4.93007100 | -0.22008400 | 0.27967000  |
| C | -3.46503300 | 0.87198200  | 1.39654000  |
| C | -4.43728100 | 1.40868800  | 2.25218200  |
| C | -2.15981900 | 1.38405600  | 1.44116500  |
| C | -4.11654400 | 2.43290000  | 3.14421700  |
| H | -5.45387700 | 1.02241000  | 2.21676700  |
| C | -1.84471200 | 2.41454300  | 2.32816500  |
| H | -1.39047100 | 0.97544600  | 0.79057300  |
| C | -2.81686300 | 2.94093500  | 3.18245100  |
| H | -4.88260500 | 2.83789300  | 3.80035700  |
| H | -0.83138100 | 2.80861600  | 2.34957900  |
| H | -2.56464300 | 3.74374200  | 3.87059700  |
| C | -1.36288600 | 3.76149400  | -2.03724700 |
| C | -1.70766000 | 2.42168400  | -2.18779100 |
| C | -3.04704200 | 2.04935300  | -2.04667700 |
| C | -4.03510300 | 2.99472600  | -1.77258100 |

|   |             |            |             |
|---|-------------|------------|-------------|
| C | -3.66887500 | 4.33215700 | -1.62519300 |
| C | -2.33289400 | 4.73501600 | -1.74862200 |
| H | -0.32363800 | 4.05907100 | -2.15296800 |
| H | -0.95406400 | 1.67641000 | -2.41787500 |
| H | -5.07102900 | 2.68439200 | -1.69172500 |
| H | -4.43509000 | 5.07408300 | -1.41515400 |
| C | -1.93731300 | 6.17996900 | -1.55891200 |
| H | -1.14132500 | 6.47211500 | -2.25245500 |
| H | -2.78712800 | 6.85259800 | -1.71205100 |
| H | -1.56096400 | 6.35235600 | -0.54183800 |

H C O N S O

6-31G\*

\*\*\*\*

Fe 0

LANL2DZ

\*\*\*\*

Fe 0

LANL2DZ

Optimized molecular structure of reactants, intermediates, and products for the ketene-first mechanism of nucleophile-catalyzed Staudinger reaction involving N-Tf imine.

### E. PPY-catalyst + ketene + N-Ts imine

%nprocshared=16

%mem=800MB

# opt=modredundant freq=noraman b3lyp/gen pseudo=read

Title Card Required

0 1

|    |             |             |             |
|----|-------------|-------------|-------------|
| C  | -3.15575900 | -4.14241500 | 1.00972200  |
| C  | -1.93775200 | -4.52321800 | 0.34833300  |
| C  | -1.96111200 | -3.97276900 | -0.97538500 |
| C  | -3.93950100 | -3.36694900 | 0.08630200  |
| C  | -3.20039000 | -3.25992100 | -1.13666000 |
| Fe | -2.10295200 | -2.45699500 | 0.44070600  |
| C  | -4.85288300 | 2.58389900  | -1.03025100 |
| C  | -4.71142600 | 2.30461500  | -2.53347500 |
| C  | -3.27949200 | 1.77037900  | -2.64593300 |
| N  | -3.06964500 | 1.05952700  | -1.37683800 |
| C  | -4.08879700 | 1.42207800  | -0.37663900 |
| C  | -1.93929500 | 0.34116200  | -1.13520000 |
| C  | -0.90183700 | 0.26952600  | -2.07935700 |
| C  | 0.28452800  | -0.44805700 | -1.81179300 |
| N  | 0.56280100  | -1.11911800 | -0.70771300 |
| C  | -0.43794100 | -1.09718900 | 0.23082600  |
| C  | -1.70298400 | -0.38768900 | 0.09317400  |

|   |             |             |             |
|---|-------------|-------------|-------------|
| H | -5.89305300 | 2.63361000  | -0.69408700 |
| H | -4.36285500 | 3.53042200  | -0.78106300 |
| H | -5.42659400 | 1.53593600  | -2.85203100 |
| H | -4.86963700 | 3.19131100  | -3.15400300 |
| H | -3.14665300 | 1.08888300  | -3.49392600 |
| H | -2.55653200 | 2.59252100  | -2.74886100 |
| H | -4.75412200 | 0.56910900  | -0.18006600 |
| H | -3.61389900 | 1.72123300  | 0.55973000  |
| H | -0.97447600 | 0.80132300  | -3.01971000 |
| H | 1.06621800  | -0.43707500 | -2.57249900 |
| C | -1.64994600 | -1.41145400 | 2.17530000  |
| H | -1.94275100 | -1.74597800 | 3.16225500  |
| C | -2.45178400 | -0.61665000 | 1.30629200  |
| H | -3.42955500 | -0.23379900 | 1.55241500  |
| C | -0.44258300 | -1.75506400 | 1.50373100  |
| H | 0.35599300  | -2.37576400 | 1.88547000  |
| C | -3.57196600 | -4.54809700 | 2.39513800  |
| H | -4.11515200 | -5.50381300 | 2.38298700  |
| H | -2.70857100 | -4.67337400 | 3.05665700  |
| H | -4.23283300 | -3.80482100 | 2.85306500  |
| C | -5.31452000 | -2.81956600 | 0.34472900  |
| H | -6.09067400 | -3.54693000 | 0.06729200  |
| H | -5.45966900 | -2.57682900 | 1.40246500  |
| H | -5.50343000 | -1.90781100 | -0.23172500 |
| C | -3.64984600 | -2.56601800 | -2.39052800 |
| H | -4.11080400 | -3.27569500 | -3.09192800 |
| H | -4.38928300 | -1.78770000 | -2.17715900 |
| H | -2.81070100 | -2.08842500 | -2.90680700 |
| C | -0.90360500 | -4.13872300 | -2.02889100 |
| H | -1.13123600 | -4.98669900 | -2.69047900 |
| H | -0.81632600 | -3.24455600 | -2.65410200 |
| H | 0.08024300  | -4.31785800 | -1.58546600 |
| C | -0.85491900 | -5.38677600 | 0.93018400  |
| H | -0.77614500 | -5.25988700 | 2.01491600  |
| H | -1.05221700 | -6.45123400 | 0.73927100  |
| H | 0.12310300  | -5.15305200 | 0.49802300  |
| S | -1.03236700 | 4.08764600  | 0.46751400  |
| O | -1.87165600 | 4.54886400  | -0.64138300 |
| O | -1.41916800 | 2.90311400  | 1.24329000  |
| C | -0.92378000 | 5.50234100  | 1.68342700  |
| F | -0.03853100 | 5.21195500  | 2.63810000  |
| F | -2.13051500 | 5.66364000  | 2.23059000  |
| F | -0.56229200 | 6.62387400  | 1.06435000  |
| N | 0.57506000  | 4.08641300  | -0.02673000 |
| C | 1.17598300  | 2.93872600  | -0.04490500 |
| H | 0.66705300  | 2.02220400  | 0.26981400  |
| C | 2.55909500  | 2.81360000  | -0.47732000 |
| C | 3.14559000  | 1.53536900  | -0.51377400 |
| C | 3.31408000  | 3.94367200  | -0.85085000 |
| C | 4.47179100  | 1.39003900  | -0.91822100 |
| H | 2.55720500  | 0.66176600  | -0.24232300 |
| C | 4.63593200  | 3.79191100  | -1.24705200 |
| H | 2.84641500  | 4.92235900  | -0.82078300 |
| C | 5.21433700  | 2.51574400  | -1.28050000 |

|   |            |             |             |
|---|------------|-------------|-------------|
| H | 4.92345200 | 0.40479400  | -0.95204000 |
| H | 5.22034500 | 4.66228900  | -1.53180500 |
| H | 6.24893300 | 2.39761500  | -1.59122400 |
| C | 4.32571900 | -2.40634500 | 2.35414800  |
| O | 4.31243600 | -2.21650500 | 3.51227500  |
| C | 4.32400800 | -2.63306000 | 1.04847000  |
| C | 5.43756200 | -2.15770800 | 0.20564700  |
| C | 5.40096800 | -2.34765500 | -1.18803500 |
| C | 6.56379000 | -1.50692400 | 0.75202400  |
| C | 6.44853100 | -1.90518200 | -1.99930800 |
| H | 4.54761600 | -2.83766200 | -1.64480100 |
| C | 7.60247300 | -1.06499700 | -0.06035400 |
| H | 6.62581800 | -1.34709200 | 1.82640200  |
| C | 7.55440800 | -1.26071100 | -1.44520400 |
| H | 6.39297400 | -2.06686100 | -3.07284500 |
| H | 8.45732100 | -0.56783300 | 0.39091100  |
| H | 8.36901900 | -0.92002200 | -2.07804600 |
| C | 3.13418100 | -3.39014700 | 0.47453700  |
| H | 2.51446400 | -2.74287600 | -0.15860000 |
| H | 3.47974200 | -4.25049500 | -0.11199500 |
| H | 2.49237200 | -3.77712300 | 1.27217900  |

B 15 75 F  
B 62 77 F

H C O N F S 0

6-31G\*

\*\*\*\*

Fe 0

LANL2DZ

\*\*\*\*

Fe 0

LANL2DZ

**TS<sub>E-F</sub>**

%nprocshared=16

%mem=800MB

# opt=(modredundant,ts,calcfc,noeigen) freq=noraman b3lyp/gen pseudo=read

Title Card Required

0 1

|    |            |             |             |
|----|------------|-------------|-------------|
| C  | 5.33983100 | -1.51025800 | -1.07325600 |
| C  | 4.35712900 | -2.39134900 | -0.50499200 |
| C  | 4.07372400 | -1.94025800 | 0.82543200  |
| C  | 5.67630000 | -0.52204700 | -0.08455400 |
| C  | 4.89169800 | -0.78508800 | 1.08485200  |
| Fe | 3.65347600 | -0.43147000 | -0.55087300 |

|   |             |             |             |
|---|-------------|-------------|-------------|
| C | 3.54281600  | 5.03596000  | 1.73580900  |
| C | 3.38903700  | 4.49701400  | 3.16503100  |
| C | 2.39057300  | 3.34652700  | 2.99278400  |
| N | 2.66938800  | 2.83489000  | 1.64042200  |
| C | 3.51864900  | 3.76474000  | 0.87482600  |
| C | 2.04679700  | 1.73627600  | 1.14384300  |
| C | 1.04248000  | 1.07953100  | 1.88445900  |
| C | 0.29965900  | 0.03640600  | 1.32942400  |
| N | 0.51351600  | -0.48806600 | 0.13114700  |
| C | 1.54802300  | 0.03735300  | -0.60951400 |
| C | 2.32691100  | 1.18302000  | -0.16125500 |
| H | 4.45696200  | 5.61723000  | 1.58618900  |
| H | 2.69074200  | 5.67601400  | 1.47931900  |
| H | 4.34747500  | 4.11146500  | 3.53253600  |
| H | 3.03373200  | 5.24816300  | 3.87567100  |
| H | 2.52370700  | 2.55451800  | 3.73758400  |
| H | 1.35206900  | 3.70226800  | 3.06055200  |
| H | 4.52867600  | 3.35072200  | 0.75050300  |
| H | 3.09634100  | 3.94319500  | -0.11694700 |
| H | 0.75612600  | 1.43483600  | 2.86510300  |
| H | -0.54050400 | -0.37815900 | 1.88006400  |
| C | 3.04357400  | 0.56092700  | -2.27623000 |
| H | 3.59320900  | 0.53278800  | -3.20767400 |
| C | 3.27010500  | 1.48026200  | -1.21448500 |
| H | 4.00991200  | 2.26435000  | -1.22767100 |
| C | 2.02764300  | -0.35848300 | -1.89292600 |
| H | 1.64363800  | -1.16762900 | -2.49517100 |
| C | 5.96260700  | -1.65063800 | -2.43319100 |
| H | 6.82709600  | -2.32848200 | -2.40163400 |
| H | 5.25523100  | -2.05915200 | -3.16205800 |
| H | 6.31783300  | -0.68978200 | -2.81901600 |
| C | 6.70858200  | 0.55904000  | -0.23578000 |
| H | 7.70554400  | 0.19592700  | 0.05026400  |
| H | 6.77620600  | 0.91449300  | -1.26920000 |
| H | 6.48521400  | 1.42375700  | 0.39818400  |
| C | 4.95775400  | -0.03978100 | 2.38724000  |
| H | 5.71291100  | -0.47967400 | 3.05344700  |
| H | 5.22344200  | 1.01241900  | 2.24243900  |
| H | 3.99951300  | -0.07045800 | 2.91547600  |
| C | 3.13766900  | -2.58046800 | 1.80967900  |
| H | 3.67504700  | -3.27671000 | 2.46876400  |
| H | 2.65254200  | -1.83405200 | 2.44670700  |
| H | 2.34258400  | -3.14285400 | 1.31403700  |
| C | 3.77709000  | -3.60229600 | -1.17831500 |
| H | 3.65488200  | -3.44923400 | -2.25532900 |
| H | 4.42881600  | -4.47669700 | -1.04321100 |
| H | 2.79718100  | -3.86009700 | -0.76687900 |
| S | -2.07397900 | 0.26273300  | -2.16768100 |
| O | -1.01310700 | -0.03024700 | -3.15117800 |
| O | -3.47371900 | 0.29929900  | -2.60945100 |
| C | -1.75700700 | 2.02582300  | -1.63751600 |
| F | -2.62709400 | 2.40503700  | -0.68919400 |
| F | -1.88361700 | 2.84384600  | -2.68744100 |
| F | -0.51328400 | 2.16745700  | -1.13968600 |

|   |             |             |             |
|---|-------------|-------------|-------------|
| N | -1.95321600 | -0.55630200 | -0.77758600 |
| C | -0.89974900 | -1.39759100 | -0.63973700 |
| H | -0.34896200 | -1.68682200 | -1.53634400 |
| C | -1.11323700 | -2.53008000 | 0.32124900  |
| C | -0.28423900 | -3.65831000 | 0.26562600  |
| C | -2.16579400 | -2.50089600 | 1.24564400  |
| C | -0.48773100 | -4.73262200 | 1.13113300  |
| H | 0.51307100  | -3.69835400 | -0.47308300 |
| C | -2.36334200 | -3.57181400 | 2.11933500  |
| H | -2.84199500 | -1.65234700 | 1.24268900  |
| C | -1.52442900 | -4.68701500 | 2.06770600  |
| H | 0.15434500  | -5.60739700 | 1.06983900  |
| H | -3.18645600 | -3.53962100 | 2.82803300  |
| H | -1.68581600 | -5.52402200 | 2.74189100  |
| C | -7.94194100 | 2.28003600  | 0.45061100  |
| O | -8.72506800 | 3.01217900  | 0.93382700  |
| C | -7.05386500 | 1.47036900  | -0.10452300 |
| C | -6.90540000 | 0.07760500  | 0.36816100  |
| C | -5.92306700 | -0.75574000 | -0.19585600 |
| C | -7.73128900 | -0.45546200 | 1.37899800  |
| C | -5.78080500 | -2.07573100 | 0.23906200  |
| H | -5.26241600 | -0.38491900 | -0.97265200 |
| C | -7.58131400 | -1.76975400 | 1.80881400  |
| H | -8.50249400 | 0.16600300  | 1.83040300  |
| C | -6.60337200 | -2.59246700 | 1.24020100  |
| H | -5.01343500 | -2.69692900 | -0.21466300 |
| H | -8.23436800 | -2.15468900 | 2.58842900  |
| H | -6.49042900 | -3.62167100 | 1.57093900  |
| C | -6.20878700 | 2.03495800  | -1.23761000 |
| H | -5.14459900 | 2.02366400  | -0.98287800 |
| H | -6.33394600 | 1.43896300  | -2.14854000 |
| H | -6.49176500 | 3.06673100  | -1.46815300 |

H C O N F S 0

6-31G\*

\*\*\*\*

Fe 0

LANL2DZ

\*\*\*\*

Fe 0

LANL2DZ

## Intermediate F

%nprocshared=16

%mem=800MB

# opt=(modredundant) freq=noraman b3lyp/gen pseudo=read

Title Card Required



0 1

|    |             |             |             |
|----|-------------|-------------|-------------|
| C  | -5.25298600 | -1.26260600 | 0.01776500  |
| C  | -4.32013800 | -1.95043000 | -0.83182200 |
| C  | -3.79495800 | -1.00362400 | -1.77094900 |
| C  | -5.31690800 | 0.10837900  | -0.40966000 |
| C  | -4.41406800 | 0.26883800  | -1.50997800 |
| Fe | -3.38664500 | -0.38341200 | 0.18191900  |
| C  | -2.21913900 | 5.40912400  | 0.65024300  |
| C  | -1.88718500 | 5.52889700  | -0.84392700 |
| C  | -1.08437600 | 4.25336200  | -1.12294900 |
| N  | -1.65150400 | 3.26503900  | -0.18592000 |
| C  | -2.50264700 | 3.91105800  | 0.83002800  |
| C  | -1.27230100 | 1.96703300  | -0.19375700 |
| C  | -0.24752200 | 1.52615000  | -1.06228200 |
| C  | 0.27693500  | 0.24643600  | -0.97078900 |
| N  | -0.19182000 | -0.70131500 | -0.15375300 |
| C  | -1.28198600 | -0.38316100 | 0.63883600  |
| C  | -1.82857200 | 0.96376500  | 0.68245800  |
| H  | -3.06658700 | 6.02775200  | 0.95841800  |
| H  | -1.35236300 | 5.69916200  | 1.25514500  |
| H  | -2.80741700 | 5.53283300  | -1.44014000 |
| H  | -1.32266100 | 6.43204000  | -1.09080600 |
| H  | -1.18853100 | 3.90458900  | -2.15552700 |
| H  | -0.01363300 | 4.39584800  | -0.92094600 |
| H  | -3.56095000 | 3.68172200  | 0.64496100  |
| H  | -2.24185600 | 3.55548700  | 1.82936100  |
| H  | 0.24937300  | 2.21094800  | -1.73377600 |
| H  | 1.14647900  | -0.02655700 | -1.55690100 |
| C  | -2.94568800 | -0.36340000 | 2.21859500  |
| H  | -3.63652200 | -0.68989400 | 2.98423900  |
| C  | -2.88326000 | 0.94568100  | 1.66989000  |
| H  | -3.51553600 | 1.76758100  | 1.96495100  |
| C  | -2.00108200 | -1.19779200 | 1.55828500  |
| H  | -1.80932400 | -2.23561400 | 1.78156400  |
| C  | -6.07827500 | -1.88609600 | 1.10720600  |
| H  | -7.03107000 | -2.26361500 | 0.71045100  |
| H  | -5.56322800 | -2.73153400 | 1.57415100  |
| H  | -6.31745900 | -1.16688800 | 1.89720200  |
| C  | -6.21040000 | 1.16907700  | 0.16734900  |
| H  | -7.18988700 | 1.17479200  | -0.33066000 |
| H  | -6.39015500 | 1.01124100  | 1.23571300  |
| H  | -5.77987500 | 2.16895700  | 0.04794600  |
| C  | -4.19943900 | 1.52241900  | -2.30854700 |
| H  | -4.86965500 | 1.55257400  | -3.17885300 |
| H  | -4.39541600 | 2.42201600  | -1.71613000 |
| H  | -3.17386600 | 1.58856600  | -2.68507300 |
| C  | -2.82711700 | -1.28577200 | -2.88429600 |
| H  | -3.35998100 | -1.52331900 | -3.81569900 |
| H  | -2.18313900 | -0.42416900 | -3.08791000 |
| H  | -2.17153000 | -2.12934600 | -2.65559000 |
| C  | -4.01244200 | -3.41971200 | -0.77721600 |
| H  | -4.03332000 | -3.80259900 | 0.24804200  |
| H  | -4.74853800 | -3.99419200 | -1.35660600 |

|   |             |             |             |
|---|-------------|-------------|-------------|
| H | -3.02640600 | -3.64305100 | -1.19362700 |
| S | 1.88566500  | -1.60889300 | 2.46969800  |
| O | 0.69805600  | -2.28436800 | 3.04214200  |
| O | 3.21889600  | -1.96771800 | 2.97579500  |
| C | 1.72495700  | 0.15759700  | 3.05859700  |
| F | 2.72200100  | 0.91647800  | 2.57365200  |
| F | 1.75380400  | 0.22336100  | 4.39534900  |
| F | 0.55857800  | 0.70621300  | 2.64432900  |
| N | 1.88650900  | -1.48907100 | 0.88317300  |
| C | 0.74516900  | -1.93200700 | 0.18952100  |
| H | 0.08238700  | -2.57615100 | 0.77432400  |
| C | 1.10144400  | -2.62746300 | -1.11828500 |
| C | 0.16398700  | -3.45584200 | -1.74766700 |
| C | 2.37357000  | -2.48925500 | -1.68492900 |
| C | 0.47745700  | -4.11515100 | -2.93658500 |
| H | -0.81063500 | -3.60317400 | -1.28795900 |
| C | 2.68578200  | -3.14015500 | -2.88074900 |
| H | 3.11539900  | -1.89790100 | -1.15839200 |
| C | 1.74006400  | -3.95035600 | -3.51183400 |
| H | -0.25640900 | -4.76535400 | -3.40601400 |
| H | 3.67756100  | -3.02561900 | -3.31037500 |
| H | 1.98937200  | -4.46462400 | -4.43635600 |
| C | 3.94548200  | 2.09717000  | -2.05319800 |
| O | 2.78202100  | 2.23070700  | -2.18870400 |
| C | 5.25469700  | 1.96613900  | -1.93203300 |
| C | 5.85174500  | 1.09066000  | -0.89596500 |
| C | 7.24480900  | 0.91799300  | -0.84556900 |
| C | 5.05943500  | 0.41226900  | 0.05112800  |
| C | 7.82317000  | 0.08904000  | 0.11843500  |
| H | 7.88560900  | 1.42740000  | -1.55851600 |
| C | 5.63755600  | -0.41822500 | 1.00746900  |
| H | 3.97766000  | 0.52607500  | 0.05429400  |
| C | 7.02667000  | -0.58253600 | 1.04443500  |
| H | 8.90398400  | -0.02881800 | 0.13809600  |
| H | 4.99842800  | -0.93394300 | 1.71883500  |
| H | 7.47884200  | -1.22937500 | 1.79116000  |
| C | 6.11097300  | 2.74406300  | -2.91992700 |
| H | 6.79095600  | 3.42273600  | -2.39067600 |
| H | 6.71780900  | 2.06360300  | -3.52971300 |
| H | 5.50022000  | 3.34540300  | -3.59995400 |

H C O N F S 0

6-31G\*

\*\*\*\*

Fe 0

LANL2DZ

\*\*\*\*

Fe 0

LANL2DZ

**TSF-G'**

```
%nprocshared=16
%mem=800MB
# freq=noraman b3lyp/gen pseudo=read
```

Title Card Required

```
0 1
C      3.47052100   -3.22881400   -0.84283200
C      2.33403400   -3.30368100    0.03314300
C      2.59916500   -2.47360100    1.16997600
C      4.44667500   -2.36466800   -0.23566200
C      3.90524000   -1.89421400    1.00379300
Fe     2.67541400   -1.33613100   -0.58319600
C      5.51158300    3.73324900    0.39533500
C      5.24415100    3.65115500    1.90481000
C      3.78845000    3.17618900    1.97299900
N      3.63091200    2.33941100    0.76752800
C      4.76168500    2.51560900   -0.16285100
C      2.50620100    1.63153600    0.52476900
C      1.38491600    1.74925000    1.37930600
C      0.15472500    1.19740000    1.05790100
N     -0.03682500    0.39652200   -0.00067600
C      1.05839300    0.09243700   -0.79311200
C      2.33529500    0.76129100   -0.61545200
H      6.57485100    3.71246700    0.14091700
H      5.08475800    4.65508900   -0.01614700
H      5.90449900    2.90968700    2.36978400
H      5.38981600    4.60292700    2.42245600
H      3.57466500    2.59201100    2.87386600
H      3.08625200    4.02083000    1.94184200
H      5.39927100    1.62124700   -0.16212200
H      4.39755700    2.68066700   -1.17951500
H      1.41346200    2.40533200    2.23788400
H     -0.73435800    1.46320500    1.62824600
C      2.43462900   -0.58227500   -2.50306900
H      2.80065800   -1.08880400   -3.38596100
C      3.18585300    0.31463800   -1.69618400
H      4.20785400    0.60115000   -1.88370500
C      1.14368000   -0.76408500   -1.92656500
H      0.36649200   -1.41721500   -2.29434800
C      3.64397100   -3.98414200   -2.12977800
H      4.10283000   -4.96593800   -1.94857700
H      2.68618800   -4.16108500   -2.62887400
H      4.29039600   -3.44826400   -2.83228900
C      5.80803000   -2.05473700   -0.78988000
H      6.53604200   -2.82375700   -0.49726400
H      5.80089900   -2.01368700   -1.88398600
H      6.18721200   -1.09447500   -0.42481600
C      4.59564600   -1.01587600    2.00809700
H      5.08687400   -1.62015300    2.78322800
H      5.36775300   -0.39269500    1.54562200
H      3.88704200   -0.35237000    2.51420200
C      1.72361400   -2.30344100    2.37768800
```

|   |             |             |             |
|---|-------------|-------------|-------------|
| H | 2.04545000  | -2.97574700 | 3.18546800  |
| H | 1.76410800  | -1.28138700 | 2.76915600  |
| H | 0.67908400  | -2.53147100 | 2.15494900  |
| C | 1.10956700  | -4.14459200 | -0.18492400 |
| H | 0.90501700  | -4.29053700 | -1.25014300 |
| H | 1.23953900  | -5.14022100 | 0.26174800  |
| H | 0.21931800  | -3.69557300 | 0.26089100  |
| S | -2.55691500 | 2.21731100  | -1.32944500 |
| O | -2.21441000 | 1.71542000  | -2.67233100 |
| O | -3.78853600 | 2.96974400  | -1.09449000 |
| C | -1.22976000 | 3.51286400  | -1.02771100 |
| F | -1.18636800 | 3.87929100  | 0.25789700  |
| F | -1.47604900 | 4.58978200  | -1.77798900 |
| F | -0.01206000 | 3.03392800  | -1.36879500 |
| N | -2.40485900 | 1.06196700  | -0.19258800 |
| C | -1.46204800 | 0.02057800  | -0.47488300 |
| H | -1.33587400 | -0.07747100 | -1.55591400 |
| C | -1.86712600 | -1.33348100 | 0.08516600  |
| C | -2.35764700 | -2.29686200 | -0.80262800 |
| C | -1.79944000 | -1.63873600 | 1.45008900  |
| C | -2.76305000 | -3.55128400 | -0.34217000 |
| H | -2.44841100 | -2.05453800 | -1.85872800 |
| C | -2.20226900 | -2.89285100 | 1.91202900  |
| H | -1.44438200 | -0.89728600 | 2.15870900  |
| C | -2.68018700 | -3.85407400 | 1.01675600  |
| H | -3.15149300 | -4.28334900 | -1.04434000 |
| H | -2.15052500 | -3.11575100 | 2.97453300  |
| H | -2.99656700 | -4.82802000 | 1.38036900  |
| C | -3.28534300 | 1.30333600  | 1.56758800  |
| O | -2.55054800 | 2.02636400  | 2.20218400  |
| C | -4.40409300 | 0.54842400  | 1.67280200  |
| C | -5.12288200 | -0.26545700 | 0.67364200  |
| C | -5.64628700 | -1.51766200 | 1.06014800  |
| C | -5.41042300 | 0.17299700  | -0.63398400 |
| C | -6.38261200 | -2.30739300 | 0.17779400  |
| H | -5.46099800 | -1.88561000 | 2.06487500  |
| C | -6.13730700 | -0.62245400 | -1.51961800 |
| H | -5.09519300 | 1.16158400  | -0.93977900 |
| C | -6.62684800 | -1.86990700 | -1.12512000 |
| H | -6.76501600 | -3.26982400 | 0.51172600  |
| H | -6.34199800 | -0.24865600 | -2.52045000 |
| H | -7.20387700 | -2.48140400 | -1.81474300 |
| C | -4.94686600 | 0.53103600  | 3.10380200  |
| H | -6.04099100 | 0.60831000  | 3.09901200  |
| H | -4.68794200 | -0.39408800 | 3.64179500  |
| H | -4.54775900 | 1.36656400  | 3.68460500  |

H C O N F S O  
6-31G\*  
\*\*\*\*  
Fe 0  
LANL2DZ  
\*\*\*\*

Fe 0  
LANL2DZ

### TSF-G

%nprocshared=8  
%mem=800MB  
# freq=noraman b3lyp/gen pseudo=read

Title Card Required

```
0 1
C      4.14610500   -2.88401000   -0.33703100
C      2.83784200   -3.12936800    0.20334600
C      2.67934800   -2.30626000    1.36531400
C      4.80290500   -1.91977300    0.50329200
C      3.89520900   -1.56021200    1.55096500
Fe     3.06729000   -1.11593500   -0.30941800
C      4.96870300    4.23254600    1.27422300
C      4.38136100    4.07910300    2.68440600
C      3.02108700    3.42260800    2.42367800
N      3.24633600    2.60458200    1.21600200
C      4.52453100    2.94611600    0.56403700
C      2.30462100    1.77005100    0.72543400
C      1.01809100    1.71151800    1.31110100
C     -0.02888500    1.02509900    0.71568900
N      0.12035800    0.25563800   -0.37133100
C      1.39405400    0.11467400   -0.89732000
C      2.50592300    0.92315000   -0.42783000
H      6.05568000    4.35106600    1.26733600
H      4.53164800    5.10440200    0.77417000
H      5.01002600    3.41590900    3.29021700
H      4.28312400    5.02844500    3.21739600
H      2.68808500    2.79340000    3.25532300
H      2.24077800    4.17199400    2.23145800
H      5.25433200    2.13827900    0.70962000
H      4.37914700    3.09106100   -0.50899000
H      0.77384800    2.32369900    2.16787100
H     -1.04507700    1.13113100    1.08518600
C      3.19852600   -0.35075900   -2.23834700
H      3.81869200   -0.79031900   -3.00802200
C      3.62956900    0.60815400   -1.28169500
H      4.62610600    1.01440400   -1.22461700
C      1.83914100   -0.69464300   -1.97973000
H      1.25079200   -1.42634200   -2.51217700
C      4.75364400   -3.57336100   -1.52558900
H      5.29220400   -4.48066200   -1.21895700
H      3.99272800   -3.87740400   -2.25109800
H      5.47052700   -2.93011900   -2.04609000
C      6.21308600   -1.42882300    0.33854400
H      6.92152200   -2.09153400    0.85439500
H      6.51093100   -1.39312300   -0.71443800
H      6.34728000   -0.42531400    0.75604700
```

|   |             |             |             |
|---|-------------|-------------|-------------|
| C | 4.17595100  | -0.62896900 | 2.69524600  |
| H | 4.52636500  | -1.18553400 | 3.57537600  |
| H | 4.95052100  | 0.10317400  | 2.44501600  |
| H | 3.27784500  | -0.07912700 | 2.99446000  |
| C | 1.49473500  | -2.27993400 | 2.28756500  |
| H | 1.65360900  | -2.95327500 | 3.14151100  |
| H | 1.31575900  | -1.27793100 | 2.69139200  |
| H | 0.58104500  | -2.60006600 | 1.78169300  |
| C | 1.84157000  | -4.12015400 | -0.32606900 |
| H | 1.91946400  | -4.23021400 | -1.41229600 |
| H | 2.01287600  | -5.11184100 | 0.11551800  |
| H | 0.81305800  | -3.83110800 | -0.09795600 |
| S | -2.39888500 | 1.82310600  | -2.12083900 |
| O | -1.73099800 | 1.49438200  | -3.39384900 |
| O | -3.77181600 | 2.32003300  | -2.09790600 |
| C | -1.40233600 | 3.28091100  | -1.49225300 |
| F | -1.69237300 | 3.54605400  | -0.21034900 |
| F | -1.65424400 | 4.36819300  | -2.22488300 |
| F | -0.07873900 | 3.01613400  | -1.57315500 |
| N | -2.22516600 | 0.64741000  | -1.01326000 |
| C | -1.10722200 | -0.22842800 | -1.18453100 |
| H | -0.74103800 | -0.18041200 | -2.21411300 |
| C | -1.44035900 | -1.67681000 | -0.86213500 |
| C | -1.48769700 | -2.59733200 | -1.91617000 |
| C | -1.76803000 | -2.10782600 | 0.43086600  |
| C | -1.84944000 | -3.92730300 | -1.68877800 |
| H | -1.26445000 | -2.26507300 | -2.92783700 |
| C | -2.12729100 | -3.43715200 | 0.65914900  |
| H | -1.77184100 | -1.40273300 | 1.25589600  |
| C | -2.16763100 | -4.35066600 | -0.39798900 |
| H | -1.88925700 | -4.62579700 | -2.52024900 |
| H | -2.39425300 | -3.75441100 | 1.66343100  |
| H | -2.45602500 | -5.38243100 | -0.21628000 |
| C | -3.57062800 | 0.46170700  | 0.53914200  |
| O | -2.96355100 | 0.88470800  | 1.49058900  |
| C | -4.70729300 | -0.11177400 | 0.08663200  |
| C | -5.77945400 | -0.30030100 | 1.09868800  |
| C | -7.05639900 | -0.74209700 | 0.68510300  |
| C | -5.60614000 | -0.07341900 | 2.48368400  |
| C | -8.09085800 | -0.94977200 | 1.59724300  |
| H | -7.25100100 | -0.91694200 | -0.36675700 |
| C | -6.64214400 | -0.28331500 | 3.38956900  |
| H | -4.64793000 | 0.27352500  | 2.85186300  |
| C | -7.89606600 | -0.72538700 | 2.95962200  |
| H | -9.05858800 | -1.28712300 | 1.23215000  |
| H | -6.46481700 | -0.09771600 | 4.44695900  |
| H | -8.70219100 | -0.88696800 | 3.67056900  |
| C | -4.97556200 | -0.54459900 | -1.33170100 |
| H | -5.37893300 | -1.56547000 | -1.34944400 |
| H | -5.70212900 | 0.10985000  | -1.83016000 |
| H | -4.06480300 | -0.53568900 | -1.92438000 |

H C O N F S O  
6-31G\*

\*\*\*\*  
Fe 0  
LANL2DZ  
\*\*\*\*

Fe 0  
LANL2DZ

## Intermediate G

%nprocshared=16  
%mem=800MB  
# freq=noraman b3lyp/gen pseudo=read

Title Card Required

0 1

|    |             |             |             |
|----|-------------|-------------|-------------|
| C  | 4.14939400  | -2.83658100 | -0.39023700 |
| C  | 2.85895800  | -3.11563700 | 0.17555600  |
| C  | 2.69814200  | -2.29244400 | 1.33748500  |
| C  | 4.79454000  | -1.85167300 | 0.43455800  |
| C  | 3.89648100  | -1.51300700 | 1.49761400  |
| Fe | 3.02295300  | -1.09953700 | -0.34985400 |
| C  | 4.91211700  | 4.29454600  | 1.10136900  |
| C  | 4.39649600  | 4.13662400  | 2.53881300  |
| C  | 3.03968600  | 3.44971500  | 2.34725600  |
| N  | 3.22276200  | 2.63214200  | 1.13175500  |
| C  | 4.46401700  | 2.99355900  | 0.42128700  |
| C  | 2.27265400  | 1.78130600  | 0.68780600  |
| C  | 1.01468700  | 1.70539300  | 1.32976100  |
| C  | -0.05193600 | 1.00550100  | 0.78858400  |
| N  | 0.06186000  | 0.23950400  | -0.31083800 |
| C  | 1.31675200  | 0.10672200  | -0.89057800 |
| C  | 2.43572800  | 0.93104500  | -0.46949100 |
| H  | 5.99454000  | 4.43743800  | 1.04147700  |
| H  | 4.43171100  | 5.15283000  | 0.61773700  |
| H  | 5.06801100  | 3.49044000  | 3.11636200  |
| H  | 4.30375400  | 5.08656900  | 3.07169500  |
| H  | 2.76141800  | 2.81641100  | 3.19563400  |
| H  | 2.23481300  | 4.18138300  | 2.19173700  |
| H  | 5.21671300  | 2.20262300  | 0.54167700  |
| H  | 4.26911300  | 3.12539500  | -0.64559000 |
| H  | 0.80228600  | 2.31535600  | 2.19683900  |
| H  | -1.07201700 | 1.08513600  | 1.19317300  |
| C  | 3.07861500  | -0.35334800 | -2.29049000 |
| H  | 3.67527400  | -0.79453900 | -3.07757800 |
| C  | 3.53197900  | 0.61979600  | -1.35941800 |
| H  | 4.52621100  | 1.03532300  | -1.33811700 |
| C  | 1.73238700  | -0.70814400 | -1.98066800 |
| H  | 1.13577100  | -1.45144000 | -2.48712500 |
| C  | 4.75497900  | -3.51584900 | -1.58569300 |
| H  | 5.31515200  | -4.41177100 | -1.28433700 |
| H  | 3.99118900  | -3.83662900 | -2.30098600 |

|   |             |             |             |
|---|-------------|-------------|-------------|
| H | 5.45274900  | -2.85982200 | -2.11629000 |
| C | 6.18752000  | -1.32287100 | 0.24232700  |
| H | 6.92571800  | -1.97905100 | 0.72356200  |
| H | 6.45558100  | -1.25561900 | -0.81724700 |
| H | 6.30846600  | -0.32639800 | 0.67991100  |
| C | 4.17443000  | -0.56724700 | 2.63050600  |
| H | 4.59119700  | -1.10335200 | 3.49418100  |
| H | 4.89608000  | 0.20593600  | 2.34791500  |
| H | 3.26132300  | -0.06674000 | 2.96782500  |
| C | 1.52906400  | -2.29635000 | 2.27938200  |
| H | 1.70875100  | -2.98484800 | 3.11694900  |
| H | 1.34725800  | -1.30462700 | 2.70613200  |
| H | 0.60922400  | -2.61482600 | 1.78346600  |
| C | 1.88284200  | -4.13779900 | -0.33007800 |
| H | 1.94024000  | -4.24793000 | -1.41764600 |
| H | 2.09488900  | -5.12258600 | 0.10923900  |
| H | 0.85123300  | -3.88053100 | -0.07981600 |
| S | -2.46244100 | 1.80189600  | -2.04992100 |
| O | -1.68703600 | 1.45268400  | -3.24705000 |
| O | -3.84434300 | 2.24903800  | -2.11950200 |
| C | -1.54870900 | 3.27927500  | -1.33780600 |
| F | -1.90175800 | 3.49404200  | -0.07036700 |
| F | -1.83546300 | 4.35931100  | -2.06652100 |
| F | -0.21863300 | 3.07289300  | -1.38812700 |
| N | -2.31700500 | 0.57691500  | -0.93519800 |
| C | -1.16366900 | -0.29877100 | -1.05197100 |
| H | -0.84761000 | -0.27325600 | -2.09469300 |
| C | -1.48299900 | -1.73909300 | -0.68643700 |
| C | -1.48742400 | -2.69070000 | -1.71355000 |
| C | -1.82963100 | -2.13346800 | 0.61429900  |
| C | -1.81858000 | -4.02228600 | -1.45194400 |
| H | -1.25494000 | -2.38557100 | -2.73175800 |
| C | -2.15546000 | -3.46541400 | 0.87441400  |
| H | -1.88839300 | -1.39457500 | 1.40757200  |
| C | -2.14853100 | -4.41234600 | -0.15379900 |
| H | -1.82536100 | -4.74657700 | -2.26180400 |
| H | -2.44000000 | -3.75737700 | 1.88135000  |
| H | -2.41314000 | -5.44539800 | 0.05515500  |
| C | -3.32247500 | 0.44053600  | 0.25326400  |
| O | -2.82802100 | 0.81923300  | 1.35258900  |
| C | -4.53918700 | -0.12845400 | -0.05927300 |
| C | -5.57481600 | -0.29113300 | 0.98041100  |
| C | -6.86201300 | -0.76849600 | 0.62992900  |
| C | -5.37072600 | -0.00029700 | 2.35348300  |
| C | -7.86784500 | -0.95097300 | 1.57754300  |
| H | -7.09116700 | -0.99199600 | -0.40582400 |
| C | -6.37974600 | -0.18601500 | 3.29523800  |
| H | -4.40678000 | 0.37923500  | 2.66210300  |
| C | -7.63849700 | -0.66514100 | 2.92362700  |
| H | -8.84065400 | -1.31708000 | 1.25502300  |
| H | -6.17671200 | 0.04999500  | 4.33847300  |
| H | -8.42192000 | -0.80762900 | 3.66412000  |
| C | -4.88543900 | -0.61708400 | -1.44835800 |
| H | -5.27927100 | -1.64212300 | -1.41343000 |



|   |             |             |             |
|---|-------------|-------------|-------------|
| H | -5.64849200 | 0.00560100  | -1.93523000 |
| H | -4.01805400 | -0.63391400 | -2.10838000 |

H C O N F S 0

6-31G\*

\*\*\*\*

Fe 0

LANL2DZ

\*\*\*\*

Fe 0

LANL2DZ

## Intermediate G'

%nprocshared=16

%mem=800MB

# freq=noraman b3lyp/gen pseudo=read

Title Card Required

0 1

|    |             |             |             |
|----|-------------|-------------|-------------|
| C  | 3.47128300  | -3.22814100 | -0.87655900 |
| C  | 2.32610800  | -3.33656200 | -0.01598300 |
| C  | 2.55895600  | -2.51435800 | 1.13410900  |
| C  | 4.42136600  | -2.35129500 | -0.24702800 |
| C  | 3.85548300  | -1.90820300 | 0.99160900  |
| Fe | 2.63281800  | -1.35523300 | -0.60422300 |
| C  | 5.51193000  | 3.71396600  | 0.26224700  |
| C  | 5.31263800  | 3.61566500  | 1.78127300  |
| C  | 3.86240900  | 3.13647000  | 1.90926000  |
| N  | 3.65352800  | 2.31100100  | 0.70354300  |
| C  | 4.74340700  | 2.49780600  | -0.27291700 |
| C  | 2.51842900  | 1.60718500  | 0.50170800  |
| C  | 1.43061100  | 1.72301600  | 1.39864900  |
| C  | 0.18436500  | 1.18366000  | 1.12307800  |
| N  | -0.04801900 | 0.39252400  | 0.06036000  |
| C  | 1.01843000  | 0.07996600  | -0.77184900 |
| C  | 2.30338600  | 0.74167200  | -0.63512100 |
| H  | 6.56272200  | 3.70133700  | -0.03999400 |
| H  | 5.06207100  | 4.63733900  | -0.12023700 |
| H  | 5.99455400  | 2.87087400  | 2.20828000  |
| H  | 5.47966400  | 4.56228900  | 2.30189400  |
| H  | 3.68915400  | 2.54276800  | 2.81248200  |
| H  | 3.15817200  | 3.97998900  | 1.91742800  |
| H  | 5.38403900  | 1.60630800  | -0.30563400 |
| H  | 4.33588800  | 2.66788400  | -1.27224000 |
| H  | 1.49612600  | 2.37298700  | 2.26017300  |
| H  | -0.70422900 | 1.45263500  | 1.71471300  |

|   |             |             |             |
|---|-------------|-------------|-------------|
| C | 2.33977400  | -0.60903100 | -2.51982200 |
| H | 2.67620300  | -1.12077800 | -3.41144000 |
| C | 3.11847100  | 0.28786600  | -1.73989400 |
| H | 4.13581300  | 0.56910200  | -1.95833800 |
| C | 1.06546200  | -0.78147500 | -1.90373200 |
| H | 0.27590400  | -1.43361000 | -2.24612600 |
| C | 3.67743200  | -3.96584600 | -2.16905800 |
| H | 4.14555100  | -4.94379400 | -1.99073600 |
| H | 2.73138100  | -4.14913700 | -2.68800300 |
| H | 4.33009300  | -3.41379700 | -2.85312100 |
| C | 5.78378100  | -2.00927500 | -0.77920000 |
| H | 6.52362500  | -2.76467300 | -0.48080400 |
| H | 5.79124900  | -1.96154600 | -1.87300700 |
| H | 6.13773900  | -1.04379600 | -0.40271400 |
| C | 4.51894700  | -1.02968600 | 2.01369900  |
| H | 5.02777800  | -1.63511400 | 2.77642000  |
| H | 5.27212900  | -0.37461200 | 1.56432900  |
| H | 3.79118600  | -0.39812500 | 2.53303000  |
| C | 1.66139800  | -2.37420100 | 2.32917200  |
| H | 1.96138600  | -3.07396400 | 3.12191100  |
| H | 1.70345300  | -1.36511100 | 2.75239100  |
| H | 0.61830500  | -2.58362300 | 2.08196700  |
| C | 1.12616800  | -4.20577100 | -0.25634900 |
| H | 0.93756400  | -4.34633600 | -1.32542600 |
| H | 1.27753900  | -5.20223500 | 0.18158900  |
| H | 0.21942100  | -3.78525800 | 0.18413700  |
| S | -2.51450200 | 2.26683100  | -1.25083300 |
| O | -2.07424500 | 1.73795600  | -2.54816600 |
| O | -3.76490400 | 2.99504200  | -1.08518800 |
| C | -1.21506000 | 3.57095500  | -0.85547700 |
| F | -1.22802900 | 3.90871700  | 0.43166600  |
| F | -1.47078500 | 4.64994100  | -1.59866000 |
| F | 0.01424300  | 3.12063300  | -1.17467900 |
| N | -2.43541100 | 1.05206700  | -0.12189400 |
| C | -1.46793500 | -0.00434800 | -0.35451700 |
| H | -1.38639000 | -0.13055200 | -1.43342900 |
| C | -1.87991700 | -1.32906200 | 0.26267600  |
| C | -2.29751600 | -2.35519400 | -0.59069000 |
| C | -1.89167800 | -1.54061000 | 1.64840700  |
| C | -2.70446700 | -3.58841200 | -0.07565200 |
| H | -2.33343100 | -2.18199100 | -1.66353100 |
| C | -2.29491800 | -2.77379700 | 2.16168800  |
| H | -1.61838600 | -0.73789900 | 2.32639200  |
| C | -2.69593700 | -3.80140000 | 1.30219600  |
| H | -3.03721400 | -4.37146400 | -0.75076900 |
| H | -2.30919300 | -2.92678100 | 3.23739500  |
| H | -3.01488700 | -4.75745400 | 1.70864600  |
| C | -3.14862300 | 1.21948700  | 1.28122600  |
| O | -2.43365000 | 1.79808900  | 2.14113100  |
| C | -4.38063700 | 0.62516100  | 1.42695000  |
| C | -5.12609600 | -0.20788000 | 0.46508900  |
| C | -5.76043900 | -1.38269300 | 0.93574100  |
| C | -5.30378300 | 0.09292300  | -0.90293900 |
| C | -6.48131300 | -2.22300200 | 0.09003300  |

|   |             |             |             |
|---|-------------|-------------|-------------|
| H | -5.66734300 | -1.64957800 | 1.98418100  |
| C | -6.01843000 | -0.75293200 | -1.75134000 |
| H | -4.93187000 | 1.02985800  | -1.29329600 |
| C | -6.60848600 | -1.92270600 | -1.26816100 |
| H | -6.94439400 | -3.12045600 | 0.49587300  |
| H | -6.13546600 | -0.47626600 | -2.79721500 |
| H | -7.17313700 | -2.57463700 | -1.93035100 |
| C | -4.92521000 | 0.70779200  | 2.84398800  |
| H | -6.02035500 | 0.66402600  | 2.84971800  |
| H | -4.56167700 | -0.10796000 | 3.49182800  |
| H | -4.60786200 | 1.64220000  | 3.31445200  |

H C O N F S 0

6-31G\*

\*\*\*\*

Fe 0

LANL2DZ

\*\*\*\*

Fe 0

LANL2DZ

**TS<sub>G-H</sub>**

%nprocshared=16

%mem=800MB

# opt=(ts,calcfc,noeigen) freq=noraman b3lyp/gen pseudo=read

Title Card Required

0 1

|    |             |             |             |
|----|-------------|-------------|-------------|
| C  | -4.65581800 | -2.88650800 | -0.73528000 |
| C  | -3.47872900 | -2.66865000 | -1.53090300 |
| C  | -3.54274400 | -1.33993600 | -2.06519400 |
| C  | -5.45578100 | -1.69264800 | -0.78948200 |
| C  | -4.76639000 | -0.73801700 | -1.60600700 |
| Fe | -3.57877700 | -1.28967700 | 0.01548300  |
| C  | -6.12931400 | 3.33008400  | 2.77555300  |
| C  | -6.10589700 | 4.17440500  | 1.49287100  |
| C  | -4.72394200 | 3.86500100  | 0.90717200  |
| N  | -4.47641100 | 2.47529300  | 1.30818900  |
| C  | -5.40259000 | 2.03987500  | 2.36401500  |
| C  | -3.36581000 | 1.79522300  | 0.89042700  |
| C  | -2.38235900 | 2.41490700  | 0.11183700  |
| C  | -1.21085200 | 1.72643000  | -0.27715000 |
| N  | -0.91990400 | 0.46890600  | 0.00589700  |
| C  | -1.87254900 | -0.18432300 | 0.74327500  |
| C  | -3.11111000 | 0.41150800  | 1.22374000  |
| H  | -7.13846600 | 3.13513000  | 3.15024800  |
| H  | -5.56867300 | 3.83758700  | 3.56953000  |
| H  | -6.89044700 | 3.84127200  | 0.80274700  |
| H  | -6.25004200 | 5.24318200  | 1.67524200  |
| H  | -4.69308400 | 3.96118200  | -0.18407500 |

|   |             |             |             |
|---|-------------|-------------|-------------|
| H | -3.95433400 | 4.53544700  | 1.32125400  |
| H | -6.11154800 | 1.29298700  | 1.97945200  |
| H | -4.85857200 | 1.58939600  | 3.19945600  |
| H | -2.47053000 | 3.45842400  | -0.16322300 |
| H | -0.45706300 | 2.27792800  | -0.83607000 |
| C | -3.01986800 | -1.79272000 | 1.94694400  |
| H | -3.28742500 | -2.73109900 | 2.41564400  |
| C | -3.82417700 | -0.61541200 | 1.94837500  |
| H | -4.78116200 | -0.52640600 | 2.43842200  |
| C | -1.85325100 | -1.55371700 | 1.16590700  |
| H | -1.06450800 | -2.26169500 | 0.94914700  |
| C | -5.01944200 | -4.16242100 | -0.03017200 |
| H | -5.58469900 | -4.83508000 | -0.69085900 |
| H | -4.13054700 | -4.70723700 | 0.30479300  |
| H | -5.64147400 | -3.97451300 | 0.85122400  |
| C | -6.80383300 | -1.51082600 | -0.15142100 |
| H | -7.60651900 | -1.87221200 | -0.80972900 |
| H | -6.88299700 | -2.06327100 | 0.79074600  |
| H | -7.01171100 | -0.45749500 | 0.06387200  |
| C | -5.24739000 | 0.63606400  | -1.97605100 |
| H | -5.73451400 | 0.63131400  | -2.96123300 |
| H | -5.97438800 | 1.02063600  | -1.25356500 |
| H | -4.41881300 | 1.35031600  | -2.02157500 |
| C | -2.54324600 | -0.69462500 | -2.98175000 |
| H | -2.83203400 | -0.82285200 | -4.03458800 |
| H | -2.45754400 | 0.37971300  | -2.79130500 |
| H | -1.54410500 | -1.12234000 | -2.85812100 |
| C | -2.39297300 | -3.67514000 | -1.78494000 |
| H | -2.23225400 | -4.32538500 | -0.91858200 |
| H | -2.64156400 | -4.32079600 | -2.63903900 |
| H | -1.44097600 | -3.18489200 | -2.01110600 |
| S | 3.23440100  | 2.79382800  | -0.32281900 |
| O | 1.89627000  | 3.03525600  | -0.85779700 |
| O | 3.75667600  | 3.47517700  | 0.85184300  |
| C | 4.42304300  | 3.15172600  | -1.74790400 |
| F | 4.37077000  | 2.14788900  | -2.62726400 |
| F | 5.65815800  | 3.31003200  | -1.30576900 |
| F | 4.00751300  | 4.27565900  | -2.33710300 |
| N | 3.36674600  | 1.10016500  | -0.08542700 |
| C | 2.43971500  | 0.21449500  | -0.57176300 |
| H | 1.38670600  | 0.45190600  | -0.41625500 |
| C | 2.74536500  | -0.94305500 | -1.35617300 |
| C | 1.68168300  | -1.84600600 | -1.61301900 |
| C | 4.01285900  | -1.19216600 | -1.94893300 |
| C | 1.88531800  | -2.96857800 | -2.40569800 |
| H | 0.70734800  | -1.63697200 | -1.17978300 |
| C | 4.19663700  | -2.31537900 | -2.74062800 |
| H | 4.82652300  | -0.49390400 | -1.78942100 |
| C | 3.14213700  | -3.21133500 | -2.96942800 |
| H | 1.06416400  | -3.65561600 | -2.59132800 |
| H | 5.16645500  | -2.49445700 | -3.19640300 |
| H | 3.29861200  | -4.08542500 | -3.59537100 |
| C | 4.52255400  | 0.51484100  | 0.58735700  |
| O | 5.64912600  | 0.75183600  | 0.14007300  |

|   |            |             |            |
|---|------------|-------------|------------|
| C | 4.11685200 | -0.36246700 | 1.65390700 |
| C | 5.05203100 | -1.34131500 | 2.18695900 |
| C | 4.66919500 | -2.16898100 | 3.27807500 |
| C | 6.33957000 | -1.57551300 | 1.62822800 |
| C | 5.50564900 | -3.16441100 | 3.76775200 |
| H | 3.69851300 | -2.03851500 | 3.74116000 |
| C | 7.16804600 | -2.57472600 | 2.12492800 |
| H | 6.67770900 | -0.94485700 | 0.81861900 |
| C | 6.76317300 | -3.37693900 | 3.19553100 |
| H | 5.17507800 | -3.77846500 | 4.60154300 |
| H | 8.14630000 | -2.72422900 | 1.67507800 |
| H | 7.41889900 | -4.15254700 | 3.58218700 |
| C | 2.81466300 | -0.16101700 | 2.40194500 |
| H | 2.19205500 | -1.06430100 | 2.41456300 |
| H | 3.02449400 | 0.09263700  | 3.45065400 |
| H | 2.21480400 | 0.64859600  | 1.98880600 |

H C O N F S 0

6-31G\*

\*\*\*\*\*

Fe 0

LANL2DZ

\*\*\*\*\*

Fe 0

LANL2DZ

**TS<sub>G</sub>-H'**

%nprocshared=16

%mem=800MB

# opt=(ts,calcfc,noeigen) freq=noraman b3lyp/gen pseudo=read

Title Card Required

0 1

|    |             |             |             |
|----|-------------|-------------|-------------|
| C  | 3.15121900  | -3.21322400 | -0.05497200 |
| C  | 2.19346400  | -2.95912300 | 0.98578400  |
| C  | 2.67778100  | -1.86466900 | 1.77380300  |
| C  | 4.23803800  | -2.28505300 | 0.10292100  |
| C  | 3.94379900  | -1.44944600 | 1.22901500  |
| Fe | 2.45055400  | -1.27476100 | -0.21251100 |
| C  | 5.28118600  | 3.84261600  | -1.27666100 |
| C  | 5.33754400  | 4.18860400  | 0.21828200  |
| C  | 3.95008200  | 3.77105100  | 0.71878100  |
| N  | 3.59428500  | 2.63009500  | -0.13748700 |
| C  | 4.48647600  | 2.52870700  | -1.30468900 |
| C  | 2.45428500  | 1.91301700  | 0.05545700  |
| C  | 1.52790800  | 2.28092000  | 1.04765000  |
| C  | 0.29611700  | 1.62082500  | 1.17008900  |
| N  | -0.07835100 | 0.58599400  | 0.44235400  |
| C  | 0.82029100  | 0.11531300  | -0.48217500 |

|   |             |             |             |
|---|-------------|-------------|-------------|
| C | 2.09863500  | 0.76071600  | -0.74104300 |
| H | 6.26818400  | 3.73811200  | -1.73625300 |
| H | 4.73565200  | 4.62023100  | -1.82394600 |
| H | 6.11190000  | 3.59428800  | 0.71784800  |
| H | 5.54646500  | 5.24452100  | 0.41124500  |
| H | 3.95157300  | 3.47451400  | 1.77366500  |
| H | 3.21874200  | 4.58477900  | 0.60039100  |
| H | 5.15357600  | 1.66087600  | -1.20823500 |
| H | 3.90724700  | 2.41390600  | -2.22438100 |
| H | 1.70748000  | 3.13740500  | 1.68393600  |
| H | -0.42860100 | 1.97959800  | 1.89678500  |
| C | 1.85262600  | -1.03393000 | -2.18722000 |
| H | 2.05200800  | -1.76624300 | -2.95853300 |
| C | 2.73800900  | 0.00965000  | -1.79655100 |
| H | 3.70406700  | 0.19382600  | -2.23862400 |
| C | 0.70190800  | -1.01109700 | -1.35066800 |
| H | -0.13706200 | -1.68982500 | -1.41102200 |
| C | 3.06072300  | -4.30555200 | -1.08240100 |
| H | 3.49715600  | -5.24081600 | -0.70434400 |
| H | 2.02185800  | -4.51724500 | -1.35525800 |
| H | 3.59750900  | -4.04435600 | -2.00027800 |
| C | 5.47803900  | -2.23281600 | -0.74375000 |
| H | 6.24382100  | -2.92654300 | -0.36957200 |
| H | 5.26934800  | -2.50771000 | -1.78290300 |
| H | 5.92165800  | -1.23169800 | -0.74996100 |
| C | 4.82618500  | -0.37656400 | 1.80119500  |
| H | 5.43789700  | -0.76859500 | 2.62594200  |
| H | 5.51419800  | 0.02898500  | 1.05206700  |
| H | 4.23964200  | 0.45800500  | 2.19937000  |
| C | 2.02695900  | -1.27929900 | 2.99413100  |
| H | 2.40989700  | -1.75204400 | 3.90963800  |
| H | 2.21799900  | -0.20449300 | 3.07492200  |
| H | 0.94202300  | -1.41231900 | 2.98372900  |
| C | 0.93185800  | -3.74028600 | 1.21903600  |
| H | 0.44082100  | -4.01434700 | 0.28012100  |
| H | 1.13953600  | -4.66923800 | 1.76848300  |
| H | 0.21116400  | -3.16803700 | 1.81001400  |
| S | -2.46943700 | 1.66928200  | -1.67159900 |
| O | -1.06246900 | 1.58517400  | -2.05194800 |
| O | -3.53698000 | 1.58510800  | -2.66110400 |
| C | -2.65063500 | 3.37718700  | -0.91754700 |
| F | -3.90051900 | 3.60930400  | -0.53753600 |
| F | -2.28573200 | 4.28075500  | -1.83167100 |
| F | -1.84206400 | 3.49498300  | 0.15087800  |
| N | -2.85188900 | 0.59947800  | -0.45634000 |
| C | -2.08732200 | -0.09789000 | 0.52147500  |
| H | -1.69440200 | -1.06006400 | 0.22634200  |
| C | -2.37435100 | 0.11668600  | 1.93725700  |
| C | -1.98418900 | -0.87315700 | 2.86429500  |
| C | -3.01482200 | 1.27867200  | 2.41444100  |
| C | -2.22655100 | -0.70985800 | 4.22257900  |
| H | -1.50870900 | -1.78022400 | 2.50053400  |
| C | -3.25685000 | 1.43234300  | 3.77962600  |
| H | -3.34505100 | 2.03622200  | 1.71626200  |

|   |             |             |             |
|---|-------------|-------------|-------------|
| C | -2.86248500 | 0.44820900  | 4.68756500  |
| H | -1.92679200 | -1.48561100 | 4.92209700  |
| H | -3.76092700 | 2.32761200  | 4.13299000  |
| H | -3.05167000 | 0.57685000  | 5.74973700  |
| C | -4.28321700 | 0.18126300  | -0.20386800 |
| O | -5.09275600 | 1.03328800  | 0.14083500  |
| C | -4.37606100 | -1.23708400 | -0.11849600 |
| C | -3.62235200 | -2.19218200 | -0.93630300 |
| C | -3.39560400 | -3.50829600 | -0.46616000 |
| C | -3.13406400 | -1.87939100 | -2.22702800 |
| C | -2.68532300 | -4.43977500 | -1.22046300 |
| H | -3.77271900 | -3.79838600 | 0.50987200  |
| C | -2.42127900 | -2.81377000 | -2.97689300 |
| H | -3.35790100 | -0.91094200 | -2.65916600 |
| C | -2.18300700 | -4.09891900 | -2.48020300 |
| H | -2.52884000 | -5.44053900 | -0.82418200 |
| H | -2.07222500 | -2.54007800 | -3.96968000 |
| H | -1.64167200 | -4.83001200 | -3.07493000 |
| C | -5.50165900 | -1.76131500 | 0.74124200  |
| H | -5.11562200 | -2.34583500 | 1.59049900  |
| H | -6.08186700 | -0.92874600 | 1.14243300  |
| H | -6.17676800 | -2.42191600 | 0.18103500  |

H C O N F S O

6-31G\*

\*\*\*\*

Fe 0

LANL2DZ

\*\*\*\*

Fe 0

LANL2DZ

## Product H + catalyst

%nprocshared=16

%mem=800MB

# opt freq=noraman b3lyp/gen pseudo=read

Title Card Required

0 1

|    |            |             |             |
|----|------------|-------------|-------------|
| C  | 4.90182200 | -2.83606400 | -0.68275500 |
| C  | 3.95554300 | -3.23812500 | 0.32183100  |
| C  | 3.95589300 | -2.24376000 | 1.35372200  |
| C  | 5.49599200 | -1.59560300 | -0.26331100 |
| C  | 4.90931200 | -1.22854200 | 0.99113600  |
| Fe | 3.43786900 | -1.39084300 | -0.47183500 |
| C  | 4.00071100 | 4.55263600  | -0.93480000 |
| C  | 4.07856500 | 4.74725100  | 0.58649800  |
| C  | 3.03766500 | 3.75284800  | 1.11268300  |
| N  | 3.07938600 | 2.65228900  | 0.14197800  |
| C  | 3.78251800 | 3.03903100  | -1.08972200 |

|   |             |             |             |
|---|-------------|-------------|-------------|
| C | 2.32724900  | 1.52326900  | 0.30988600  |
| C | 1.47445800  | 1.37496000  | 1.40996300  |
| C | 0.62575700  | 0.25177700  | 1.53190100  |
| N | 0.54968000  | -0.76213600 | 0.68874400  |
| C | 1.41006600  | -0.68127300 | -0.37489600 |
| C | 2.32342700  | 0.42440100  | -0.63125700 |
| H | 4.89363000  | 4.89819500  | -1.46401800 |
| H | 3.13935100  | 5.09710700  | -1.33960700 |
| H | 5.07576500  | 4.47771700  | 0.95484200  |
| H | 3.86924900  | 5.77306700  | 0.90291800  |
| H | 3.27263700  | 3.38957500  | 2.11956800  |
| H | 2.03137200  | 4.19838300  | 1.14518300  |
| H | 4.74086300  | 2.50706200  | -1.17576700 |
| H | 3.18398900  | 2.79955200  | -1.97313500 |
| H | 1.38614900  | 2.15700900  | 2.15285200  |
| H | -0.06152000 | 0.22488400  | 2.37610200  |
| C | 2.55438800  | -1.14065500 | -2.33176300 |
| H | 2.90609700  | -1.64086600 | -3.22503300 |
| C | 3.04733000  | 0.10437000  | -1.84042700 |
| H | 3.81067400  | 0.69511200  | -2.32276500 |
| C | 1.59124900  | -1.65001100 | -1.41503400 |
| H | 1.06454600  | -2.59236300 | -1.48408300 |
| C | 5.26216600  | -3.61331200 | -1.91732800 |
| H | 6.09053000  | -4.30860400 | -1.72032500 |
| H | 4.41842300  | -4.20880600 | -2.28120500 |
| H | 5.57782300  | -2.95490600 | -2.73351900 |
| C | 6.58565900  | -0.85525400 | -0.98564800 |
| H | 7.57822300  | -1.22370700 | -0.69004600 |
| H | 6.50547300  | -0.97388600 | -2.07126000 |
| H | 6.56071800  | 0.21754300  | -0.76762800 |
| C | 5.26052800  | -0.02813600 | 1.82340200  |
| H | 6.03675200  | -0.27311000 | 2.56206100  |
| H | 5.64125800  | 0.79419300  | 1.20912100  |
| H | 4.39076700  | 0.34668000  | 2.37273300  |
| C | 3.13906900  | -2.26755300 | 2.61332800  |
| H | 3.70450900  | -2.71501000 | 3.44295900  |
| H | 2.84408900  | -1.25896400 | 2.91922800  |
| H | 2.21990200  | -2.84622900 | 2.48570900  |
| C | 3.13541600  | -4.49680100 | 0.30872900  |
| H | 2.89474200  | -4.81165300 | -0.71190900 |
| H | 3.67393600  | -5.32578800 | 0.78922100  |
| H | 2.19012400  | -4.36427300 | 0.84390400  |
| C | -3.67646600 | -0.40056900 | -1.28588400 |
| S | -2.81020700 | 2.64152100  | 0.77674800  |
| O | -3.84195800 | 3.66552100  | 0.78488300  |
| O | -2.11093100 | 2.19632000  | 1.97490700  |
| N | -3.37808100 | 1.26758900  | -0.01112900 |
| C | -2.95924500 | -0.16832100 | 0.12525600  |
| C | -4.86701400 | -1.33947800 | -1.35342200 |
| C | -4.70978400 | -2.69113400 | -1.01043300 |
| C | -6.11597800 | -0.90179800 | -1.81380300 |
| C | -5.77759400 | -3.58062800 | -1.11539400 |
| H | -3.75107800 | -3.04771000 | -0.64457500 |
| C | -7.18524100 | -1.79502600 | -1.91965300 |



|   |             |             |             |
|---|-------------|-------------|-------------|
| H | -6.25195400 | 0.13546500  | -2.10281500 |
| C | -7.02103000 | -3.13505700 | -1.57059300 |
| H | -5.63863900 | -4.62209400 | -0.83782000 |
| H | -8.14693700 | -1.43782400 | -2.27830600 |
| H | -7.85366300 | -3.82857300 | -1.65237200 |
| H | -1.87609000 | -0.27494600 | 0.03392200  |
| C | -3.43651000 | -0.86696500 | 1.36890400  |
| C | -2.57435900 | -1.78039600 | 1.99135000  |
| C | -4.71091900 | -0.64822100 | 1.90945400  |
| C | -2.98864900 | -2.47492300 | 3.13007200  |
| H | -1.57359500 | -1.92600800 | 1.58906200  |
| C | -5.11816600 | -1.33698900 | 3.05060600  |
| H | -5.38327900 | 0.06528000  | 1.44205800  |
| C | -4.26008300 | -2.25554900 | 3.66158100  |
| H | -2.31110600 | -3.17786600 | 3.60776600  |
| H | -6.10682700 | -1.15629200 | 3.46379300  |
| H | -4.58007700 | -2.79058000 | 4.55188200  |
| C | -3.99377700 | 1.10768200  | -1.27330500 |
| O | -4.48143800 | 1.90404200  | -2.02958300 |
| C | -2.65791700 | -0.70438600 | -2.40306900 |
| H | -2.28982800 | -1.73092200 | -2.30964500 |
| H | -3.13640300 | -0.59502400 | -3.38113600 |
| H | -1.79979800 | -0.02499300 | -2.35511400 |
| C | -1.48742500 | 3.23402000  | -0.42331100 |
| F | -0.77532300 | 2.18855200  | -0.86340200 |
| F | -0.67808200 | 4.08231600  | 0.21572300  |
| F | -2.05016500 | 3.84626600  | -1.45996900 |

H C O N F S O

6-31G\*

\*\*\*\*

Fe 0

LANL2DZ

\*\*\*\*

Fe 0

LANL2DZ

### Product H' + catalyst

%nprocshared=16

%mem=800MB

# opt freq=noraman b3lyp/gen pseudo=read

Title Card Required

0 1

|    |            |             |             |
|----|------------|-------------|-------------|
| C  | 4.23384300 | -2.77213600 | -0.15311800 |
| C  | 3.22804000 | -2.87073500 | 0.86869300  |
| C  | 3.37896400 | -1.75033100 | 1.74904600  |
| C  | 5.01559200 | -1.59329800 | 0.10537500  |
| C  | 4.48643400 | -0.96110000 | 1.27756800  |
| Fe | 3.01925500 | -1.09727100 | -0.19056700 |
| C  | 4.47657600 | 4.60272800  | -1.17958000 |

|   |             |             |             |
|---|-------------|-------------|-------------|
| C | 4.54488400  | 4.90681800  | 0.32398400  |
| C | 3.33201300  | 4.15187700  | 0.88013900  |
| N | 3.20945200  | 2.98534500  | -0.00115300 |
| C | 4.01244200  | 3.13860500  | -1.22276800 |
| C | 2.28147300  | 2.00647900  | 0.22622500  |
| C | 1.35669500  | 2.10659700  | 1.27119000  |
| C | 0.36156200  | 1.12132500  | 1.46677100  |
| N | 0.20011400  | 0.02560300  | 0.74893000  |
| C | 1.10394600  | -0.12357600 | -0.27094600 |
| C | 2.16542700  | 0.81987900  | -0.59266900 |
| H | 5.42869200  | 4.75067400  | -1.69771800 |
| H | 3.72932400  | 5.24576600  | -1.65958900 |
| H | 5.46947300  | 4.50210500  | 0.75310900  |
| H | 4.50844900  | 5.97599600  | 0.55189200  |
| H | 3.46986700  | 3.83547500  | 1.92059900  |
| H | 2.42187100  | 4.77071400  | 0.83960300  |
| H | 4.87211000  | 2.45279700  | -1.21654600 |
| H | 3.41467000  | 2.92190000  | -2.11270500 |
| H | 1.34305700  | 2.97472800  | 1.91837100  |
| H | -0.36045900 | 1.27878900  | 2.26703100  |
| C | 2.24484600  | -0.93633800 | -2.10911500 |
| H | 2.55608600  | -1.57070900 | -2.92915800 |
| C | 2.88478600  | 0.27854500  | -1.72282600 |
| H | 3.73892600  | 0.70865200  | -2.22231600 |
| C | 1.18894400  | -1.21427900 | -1.19578300 |
| H | 0.53459400  | -2.07523600 | -1.20006300 |
| C | 4.47591900  | -3.76496400 | -1.25472400 |
| H | 5.17944900  | -4.54728700 | -0.93607800 |
| H | 3.55133300  | -4.26495200 | -1.56150900 |
| H | 4.90187600  | -3.28748100 | -2.14336400 |
| C | 6.21034600  | -1.14101700 | -0.68536200 |
| H | 7.13596100  | -1.59329900 | -0.30187200 |
| H | 6.12515300  | -1.42048700 | -1.74066300 |
| H | 6.33766400  | -0.05421100 | -0.64171600 |
| C | 5.02495300  | 0.27410900  | 1.94190800  |
| H | 5.75067700  | 0.01706500  | 2.72646500  |
| H | 5.53426800  | 0.92906500  | 1.22763700  |
| H | 4.22668700  | 0.85783100  | 2.41132500  |
| C | 2.54771300  | -1.46867800 | 2.96716300  |
| H | 2.94950800  | -1.98409700 | 3.85104300  |
| H | 2.51636800  | -0.39868600 | 3.19400700  |
| H | 1.51338000  | -1.79657400 | 2.82733100  |
| C | 2.21724500  | -3.97257100 | 1.01314700  |
| H | 1.96240600  | -4.41525800 | 0.04486900  |
| H | 2.59915000  | -4.78033500 | 1.65360200  |
| H | 1.28899400  | -3.60640000 | 1.46290400  |
| C | -4.11267300 | -1.32521600 | -0.31450600 |
| S | -3.50592100 | 2.41738100  | -0.46406700 |
| O | -4.68525700 | 3.12646200  | -0.93490300 |
| O | -2.75563600 | 2.80806600  | 0.72179100  |
| N | -3.87260800 | 0.78008300  | -0.31003700 |
| C | -3.25855600 | -0.28440200 | 0.54705400  |
| H | -2.18750700 | -0.37997100 | 0.34738800  |
| C | -3.49704100 | -0.16819000 | 2.02988500  |

|   |             |             |             |
|---|-------------|-------------|-------------|
| C | -2.56960300 | -0.76270000 | 2.89744800  |
| C | -4.61312300 | 0.48251500  | 2.57209300  |
| C | -2.76919400 | -0.73101200 | 4.27876300  |
| H | -1.67486900 | -1.22054400 | 2.48288000  |
| C | -4.80744000 | 0.52085900  | 3.95286400  |
| H | -5.32373300 | 0.97588700  | 1.91509200  |
| C | -3.89080100 | -0.09214100 | 4.81020800  |
| H | -2.04050100 | -1.19401500 | 4.93895900  |
| H | -5.67412100 | 1.03536000  | 4.35903500  |
| H | -4.04375400 | -0.06036900 | 5.88560600  |
| C | -4.56100200 | -0.11567800 | -1.15989600 |
| O | -5.21686400 | 0.06256800  | -2.15043500 |
| C | -2.28955900 | 2.39702200  | -1.89012200 |
| F | -1.27709500 | 1.57887500  | -1.59926900 |
| F | -1.82749300 | 3.63404900  | -2.07412000 |
| F | -2.89800800 | 1.97438700  | -2.99660700 |
| C | -3.28712000 | -2.36196500 | -1.06307400 |
| C | -3.46192400 | -2.58839600 | -2.43477700 |
| C | -2.37569100 | -3.16050700 | -0.35622200 |
| C | -2.73231000 | -3.58624700 | -3.08565000 |
| H | -4.16909500 | -1.98364600 | -2.99318500 |
| C | -1.65140200 | -4.15991500 | -1.00647400 |
| H | -2.23263900 | -3.00165800 | 0.70939900  |
| C | -1.82603700 | -4.37475900 | -2.37622000 |
| H | -2.87673900 | -3.74565600 | -4.15088800 |
| H | -0.95241900 | -4.77133000 | -0.44164300 |
| H | -1.26277500 | -5.15345500 | -2.88355600 |
| C | -5.29717600 | -1.99027300 | 0.40492000  |
| H | -4.93524500 | -2.72416900 | 1.13196500  |
| H | -5.91912000 | -1.26283400 | 0.93360600  |
| H | -5.91815100 | -2.51057400 | -0.33088400 |

H C O N F S 0

6-31G\*

\*\*\*\*

Fe 0

LANL2DZ

\*\*\*\*

Fe 0

LANL2DZ

Optimized molecular structure of reactants, intermediates, and products for the imine-first mechanism of nucleophile-catalyzed Staudinger reaction involving N-Tf imine.

**TS<sub>E-J</sub>**

%nprocshared=16

%mem=800MB

# opt=(modredundant,ts,calcfc,noeigen) freq=noraman b3lyp/gen pseudo=read

Title Card Required

0 1

|    |             |             |             |
|----|-------------|-------------|-------------|
| C  | 2.08444800  | -2.49728800 | 1.71042900  |
| C  | 1.42519400  | -1.43971800 | 2.42607600  |
| C  | 2.36838000  | -0.37661000 | 2.61385000  |
| C  | 3.44261700  | -2.09024400 | 1.46883200  |
| C  | 3.61624900  | -0.78071300 | 2.02302900  |
| Fe | 2.10954500  | -0.76268000 | 0.58493200  |
| C  | 6.53337500  | 0.51398500  | -3.13544400 |
| C  | 7.19290500  | 1.45344700  | -2.11540800 |
| C  | 5.99920900  | 2.21841500  | -1.53189200 |
| N  | 4.89743600  | 1.24731600  | -1.58685800 |
| C  | 5.23114500  | 0.09375800  | -2.43816200 |
| C  | 3.67793000  | 1.50646300  | -1.03945500 |
| C  | 3.39257500  | 2.76031400  | -0.47070700 |
| C  | 2.11120000  | 3.06334100  | 0.01761800  |
| N  | 1.09143800  | 2.22129800  | 0.06330600  |
| C  | 1.32923100  | 0.96435900  | -0.43411300 |
| C  | 2.59408800  | 0.55094000  | -1.02389600 |
| H  | 7.15545500  | -0.34566200 | -3.40066400 |
| H  | 6.30395800  | 1.06007500  | -4.05807800 |
| H  | 7.68785700  | 0.87277400  | -1.32782500 |
| H  | 7.93663500  | 2.12137900  | -2.55889200 |
| H  | 6.16978900  | 2.54743100  | -0.50085200 |
| H  | 5.76108900  | 3.10962300  | -2.13252100 |
| H  | 5.38083900  | -0.80789600 | -1.82847500 |
| H  | 4.42645600  | -0.10723400 | -3.15026500 |
| H  | 4.13515900  | 3.54754800  | -0.46694500 |
| H  | 1.90735300  | 4.07228600  | 0.36970800  |
| C  | 1.08310600  | -1.20668500 | -1.17346800 |
| H  | 0.64594000  | -2.17256600 | -1.38521000 |
| C  | 2.42386000  | -0.81850300 | -1.45447400 |
| H  | 3.15730300  | -1.45040600 | -1.92981600 |
| C  | 0.42562900  | -0.13887800 | -0.49988700 |
| H  | -0.58768700 | -0.13756400 | -0.12670200 |
| C  | 1.49204200  | -3.83011400 | 1.35057400  |
| H  | 1.69381800  | -4.57195800 | 2.13645300  |
| H  | 0.40824700  | -3.77715800 | 1.22231300  |
| H  | 1.91113400  | -4.22186300 | 0.41816500  |
| C  | 4.49904800  | -2.92256100 | 0.79919900  |
| H  | 5.03026000  | -3.55154600 | 1.52740300  |
| H  | 4.06726900  | -3.58995400 | 0.04648100  |
| H  | 5.24938300  | -2.30054900 | 0.29966000  |
| C  | 4.88589800  | 0.02174200  | 2.04153100  |
| H  | 5.43875000  | -0.13556200 | 2.97836000  |
| H  | 5.55278900  | -0.25482000 | 1.21845000  |
| H  | 4.68259800  | 1.09446400  | 1.95645600  |
| C  | 2.12828900  | 0.91189100  | 3.34662000  |
| H  | 2.50278400  | 0.85606900  | 4.37854600  |
| H  | 2.63170500  | 1.75400300  | 2.85981400  |
| H  | 1.06288700  | 1.15365600  | 3.39770100  |
| C  | 0.01049400  | -1.46717700 | 2.93221500  |
| H  | -0.63094100 | -2.09690300 | 2.30924900  |

|   |             |             |             |
|---|-------------|-------------|-------------|
| H | -0.03145000 | -1.86897400 | 3.95438700  |
| H | -0.43120300 | -0.46591700 | 2.95659800  |
| C | -0.82564700 | 3.00550600  | -0.29690200 |
| O | -1.10979600 | 2.48750300  | -1.33543900 |
| C | -1.11908300 | 3.87731600  | 0.69520600  |
| C | -2.24426600 | 4.80565500  | 0.43542400  |
| C | -2.71126200 | 5.65186500  | 1.46523200  |
| C | -2.88169600 | 4.92322700  | -0.82261100 |
| C | -3.75788000 | 6.55010500  | 1.25473900  |
| H | -2.25206100 | 5.61125300  | 2.44672000  |
| C | -3.92584500 | 5.82232600  | -1.02640100 |
| H | -2.54303000 | 4.31320300  | -1.65331500 |
| C | -4.37892000 | 6.64408900  | 0.00983200  |
| H | -4.08650100 | 7.18167300  | 2.07706400  |
| H | -4.38322900 | 5.88678200  | -2.01130600 |
| H | -5.19284100 | 7.34509700  | -0.15373700 |
| C | -0.43074600 | 3.91143500  | 2.03593500  |
| H | 0.01783200  | 4.89260200  | 2.24899600  |
| H | -1.14280300 | 3.70824900  | 2.84813300  |
| H | 0.34914700  | 3.15382600  | 2.09014000  |
| S | -2.70388300 | -4.01556800 | -1.29828900 |
| O | -3.22542300 | -5.01191800 | -2.22740600 |
| O | -1.39072800 | -3.39552100 | -1.51923500 |
| C | -2.60172100 | -4.83064800 | 0.38122000  |
| F | -2.30893200 | -3.91279000 | 1.31398400  |
| F | -1.62429500 | -5.73829700 | 0.34314500  |
| F | -3.75073100 | -5.42261700 | 0.69152300  |
| N | -3.92168900 | -2.90368600 | -0.94654200 |
| C | -3.61870400 | -1.65536100 | -1.11265500 |
| H | -2.61781400 | -1.35705100 | -1.44373700 |
| C | -4.56952800 | -0.58698500 | -0.85670200 |
| C | -4.13085100 | 0.74655100  | -0.95962200 |
| C | -5.90325600 | -0.86198700 | -0.49203800 |
| C | -5.01207100 | 1.79205300  | -0.68872700 |
| H | -3.10345700 | 0.96964500  | -1.24000700 |
| C | -6.77725700 | 0.18464400  | -0.23246100 |
| H | -6.22758700 | -1.89516300 | -0.42182900 |
| C | -6.33129400 | 1.51046800  | -0.32780800 |
| H | -4.66644100 | 2.81933500  | -0.75281100 |
| H | -7.80627500 | -0.02432200 | 0.04592000  |
| H | -7.01755200 | 2.32667200  | -0.11825300 |

H C O N F S 0

6-31G\*

\*\*\*\*

Fe 0

LANL2DZ

\*\*\*\*

Fe 0

LANL2DZ

## Intermediate J

%nprocshared=16

%mem=800MB

# opt=(modredundant) freq=noraman b3lyp/gen pseudo=read

Title Card Required

0 1

|    |             |             |             |
|----|-------------|-------------|-------------|
| C  | -2.29511400 | 2.70816900  | 1.38767100  |
| C  | -1.99614700 | 1.57111300  | 2.21459400  |
| C  | -3.14248400 | 0.71256600  | 2.21047100  |
| C  | -3.63435600 | 2.55386500  | 0.88434500  |
| C  | -4.15395300 | 1.31502500  | 1.38453400  |
| Fe | -2.43648600 | 0.98269700  | 0.26067100  |
| C  | -6.49545600 | -1.48775800 | -3.19316000 |
| C  | -6.89776600 | -2.50248400 | -2.11357100 |
| C  | -5.54696500 | -2.97767800 | -1.56633300 |
| N  | -4.67387600 | -1.80009300 | -1.70799200 |
| C  | -5.28087800 | -0.77706800 | -2.57783400 |
| C  | -3.43767900 | -1.74477800 | -1.15504900 |
| C  | -2.88533400 | -2.88469300 | -0.52658700 |
| C  | -1.59915100 | -2.87970800 | 0.00054100  |
| N  | -0.80902400 | -1.80435900 | 0.03787300  |
| C  | -1.28074700 | -0.64650500 | -0.56209700 |
| C  | -2.58352400 | -0.58244400 | -1.20316400 |
| H  | -7.29483500 | -0.78701600 | -3.44946000 |
| H  | -6.19854000 | -2.00921600 | -4.11057100 |
| H  | -7.47092800 | -2.00862700 | -1.32013200 |
| H  | -7.50041200 | -3.32916700 | -2.49958600 |
| H  | -5.60062700 | -3.28970800 | -0.51809800 |
| H  | -5.15153600 | -3.82204600 | -2.14996600 |
| H  | -5.58540300 | 0.09513100  | -1.98525300 |
| H  | -4.56777500 | -0.44630400 | -3.33693600 |
| H  | -3.42613700 | -3.82098300 | -0.50765700 |
| H  | -1.16501200 | -3.78727500 | 0.40150400  |
| C  | -1.46274500 | 1.42299500  | -1.52390700 |
| H  | -1.22095900 | 2.43060700  | -1.83288500 |
| C  | -2.68693500 | 0.74319700  | -1.77476700 |
| H  | -3.51751100 | 1.15224100  | -2.32672200 |
| C  | -0.61699200 | 0.59650200  | -0.73465000 |
| H  | 0.36355800  | 0.84597200  | -0.37066100 |
| C  | -1.38100100 | 3.87307000  | 1.13388500  |
| H  | -1.41794100 | 4.58741000  | 1.96804800  |
| H  | -0.34086800 | 3.55881100  | 1.01268700  |
| H  | -1.66317200 | 4.41664300  | 0.22719100  |
| C  | -4.35854700 | 3.53574300  | 0.00795500  |
| H  | -4.84184700 | 4.31933500  | 0.60749200  |
| H  | -3.67604200 | 4.03215500  | -0.68914300 |
| H  | -5.14021800 | 3.05002400  | -0.58502500 |
| C  | -5.53141900 | 0.75879400  | 1.16220300  |
| H  | -6.19721900 | 0.99405000  | 2.00451100  |
| H  | -5.99443700 | 1.17088000  | 0.25949900  |
| H  | -5.50948100 | -0.33155700 | 1.05832300  |

|   |             |             |             |
|---|-------------|-------------|-------------|
| C | -3.31408900 | -0.55388400 | 2.99974800  |
| H | -3.96174200 | -0.38151900 | 3.87082700  |
| H | -3.77352300 | -1.35256100 | 2.40617500  |
| H | -2.35754700 | -0.92549200 | 3.37332100  |
| C | -0.71746700 | 1.34914400  | 2.97360800  |
| H | 0.12084100  | 1.87971600  | 2.51387900  |
| H | -0.80928500 | 1.71351800  | 4.00643000  |
| H | -0.44357100 | 0.29075500  | 3.01839300  |
| C | 0.69045200  | -1.89645000 | 0.44821100  |
| O | 1.43656700  | -1.42131200 | -0.43673900 |
| C | 0.93651200  | -2.48933900 | 1.67785400  |
| C | 2.32289300  | -2.75992600 | 2.10465900  |
| C | 2.57359500  | -3.59346500 | 3.22214700  |
| C | 3.46337700  | -2.22088800 | 1.45952300  |
| C | 3.86735800  | -3.87562100 | 3.65849200  |
| H | 1.74510400  | -4.04488900 | 3.75766200  |
| C | 4.75303100  | -2.50272800 | 1.90203900  |
| H | 3.31463400  | -1.56785300 | 0.61198700  |
| C | 4.97340600  | -3.33406300 | 3.00340600  |
| H | 4.00729300  | -4.52711600 | 4.51877700  |
| H | 5.59835800  | -2.06116000 | 1.37796500  |
| H | 5.98267500  | -3.55192600 | 3.34348400  |
| C | -0.15177700 | -2.87274500 | 2.66099900  |
| H | -0.30451300 | -3.96116100 | 2.75296300  |
| H | 0.10282300  | -2.51898700 | 3.66953100  |
| H | -1.11788800 | -2.43487600 | 2.40868400  |
| S | 2.99727700  | 3.05942000  | -0.89222300 |
| O | 3.54157700  | 4.39284500  | -1.11286700 |
| O | 1.59849600  | 2.75196900  | -1.22732000 |
| C | 3.12986700  | 2.69048200  | 0.94148500  |
| F | 2.76886200  | 1.42303400  | 1.16855200  |
| F | 2.28995300  | 3.50472300  | 1.59585800  |
| F | 4.36854000  | 2.88961900  | 1.38158400  |
| N | 4.09562900  | 1.94226400  | -1.51541300 |
| C | 3.62648200  | 0.76004500  | -1.77755900 |
| H | 2.58768200  | 0.48112900  | -1.57742400 |
| C | 4.47162200  | -0.27937000 | -2.34660200 |
| C | 3.95239900  | -1.58443900 | -2.44391500 |
| C | 5.77731800  | -0.00213000 | -2.79854400 |
| C | 4.73874600  | -2.59931800 | -2.98771500 |
| H | 2.95846500  | -1.79175200 | -2.05401300 |
| C | 6.54760400  | -1.01873900 | -3.34723300 |
| H | 6.15957400  | 1.01012400  | -2.71508900 |
| C | 6.02848000  | -2.31760000 | -3.44220900 |
| H | 4.34667900  | -3.61014900 | -3.05136600 |
| H | 7.55249500  | -0.80795500 | -3.70212000 |
| H | 6.63687600  | -3.11046500 | -3.86977000 |

H C O N F S 0  
6-31G\*  
\*\*\*\*  
Fe 0  
LANL2DZ  
\*\*\*\*

Fe 0  
LANL2DZ

**TSJ-k**

%nprocshared=16

%mem=1GB

# freq=noraman b3lyp/gen pseudo=read

Title Card Required

0 1

|    |             |             |             |
|----|-------------|-------------|-------------|
| C  | -3.85433500 | -2.88160300 | -1.03830500 |
| C  | -2.70710400 | -2.39716800 | -1.75519600 |
| C  | -2.93917900 | -1.02136300 | -2.07813400 |
| C  | -4.80108100 | -1.80495300 | -0.93119400 |
| C  | -4.23185400 | -0.65334500 | -1.56661200 |
| Fe | -3.01761000 | -1.29792800 | -0.00251400 |
| C  | -4.78147000 | 3.92878800  | 2.16124900  |
| C  | -4.25043200 | 4.69006300  | 0.93854000  |
| C  | -2.90164700 | 4.01368000  | 0.66930800  |
| N  | -3.11089600 | 2.61768500  | 1.10610500  |
| C  | -4.35376900 | 2.47966700  | 1.88911200  |
| C  | -2.18075500 | 1.65879400  | 0.91396200  |
| C  | -0.91943500 | 1.98636200  | 0.36344000  |
| C  | 0.09932900  | 1.05806500  | 0.25282900  |
| N  | -0.03224800 | -0.24080100 | 0.57569400  |
| C  | -1.26454000 | -0.66120800 | 1.07620800  |
| C  | -2.35856500 | 0.27299300  | 1.28437200  |
| H  | -5.86312400 | 4.01931100  | 2.29321600  |
| H  | -4.29875200 | 4.29507400  | 3.07456700  |
| H  | -4.91940800 | 4.55067200  | 0.08132100  |
| H  | -4.14314700 | 5.76419200  | 1.11068000  |
| H  | -2.61240200 | 4.04397700  | -0.38559200 |
| H  | -2.09447100 | 4.47471000  | 1.25493500  |
| H  | -5.11300100 | 1.94311200  | 1.30561200  |
| H  | -4.16463900 | 1.92153200  | 2.80883700  |
| H  | -0.67300400 | 3.00135900  | 0.08433300  |
| H  | 1.09457400  | 1.38794700  | -0.04258800 |
| C  | -3.00473300 | -1.83225000 | 2.00663300  |
| H  | -3.59517000 | -2.64452700 | 2.40903800  |
| C  | -3.44933200 | -0.49218500 | 1.84570400  |
| H  | -4.42715000 | -0.12995700 | 2.11767600  |
| C  | -1.68100800 | -1.95450300 | 1.49690600  |
| H  | -1.07652600 | -2.84644100 | 1.48073600  |
| C  | -4.05505800 | -4.28532900 | -0.54343300 |
| H  | -4.49622700 | -4.91829800 | -1.32564000 |
| H  | -3.10933100 | -4.74833600 | -0.24462200 |
| H  | -4.72781700 | -4.31805100 | 0.31946300  |
| C  | -6.16240100 | -1.89105000 | -0.30244600 |
| H  | -6.91068000 | -2.23191800 | -1.03104200 |
| H  | -6.17941100 | -2.59638600 | 0.53449800  |



|   |             |             |             |
|---|-------------|-------------|-------------|
| H | -6.49663300 | -0.91996000 | 0.07665300  |
| C | -4.89118500 | 0.68441600  | -1.74693300 |
| H | -5.37386800 | 0.75657600  | -2.73144600 |
| H | -5.66686900 | 0.85881600  | -0.99395200 |
| H | -4.16839700 | 1.50422500  | -1.67979900 |
| C | -2.03649100 | -0.12896100 | -2.88011500 |
| H | -2.36200300 | -0.09168500 | -3.92886000 |
| H | -2.03347500 | 0.89863800  | -2.50269500 |
| H | -1.00400800 | -0.48489500 | -2.87223700 |
| C | -1.50572900 | -3.21200300 | -2.14173600 |
| H | -1.31014700 | -4.01141000 | -1.42070500 |
| H | -1.65544700 | -3.68516700 | -3.12193200 |
| H | -0.60110200 | -2.60135900 | -2.20902400 |
| C | 1.16642000  | -1.17710500 | 0.68911400  |
| O | 1.14597700  | -1.85907500 | 1.69730000  |
| C | 2.20179300  | -1.10114800 | -0.33627600 |
| C | 3.14206200  | -2.28919000 | -0.42566400 |
| C | 4.15869700  | -2.24810800 | -1.40655000 |
| C | 3.07120200  | -3.44812700 | 0.37084100  |
| C | 5.04980900  | -3.30490200 | -1.58277000 |
| H | 4.26910000  | -1.37085000 | -2.03593500 |
| C | 3.96077600  | -4.50925900 | 0.18497900  |
| H | 2.32435700  | -3.51739000 | 1.14810400  |
| C | 4.95606700  | -4.44929800 | -0.78907700 |
| H | 5.82132800  | -3.22729600 | -2.34465700 |
| H | 3.87043800  | -5.38920500 | 0.81777900  |
| H | 5.64946200  | -5.27520500 | -0.92476900 |
| C | 1.78195500  | -0.63506900 | -1.73541900 |
| H | 2.57776100  | -0.07746600 | -2.23059800 |
| H | 1.55440700  | -1.50822800 | -2.36053100 |
| H | 0.90451300  | 0.00738100  | -1.73670900 |
| S | 3.78739700  | 2.37264300  | -1.24251400 |
| O | 4.63255500  | 3.49036700  | -0.80366700 |
| O | 4.32232700  | 1.47089100  | -2.28636300 |
| C | 2.32217600  | 3.23773600  | -2.01937900 |
| F | 1.47150600  | 2.36560900  | -2.59532600 |
| F | 2.74560600  | 4.08832400  | -2.95686800 |
| F | 1.62371200  | 3.93135100  | -1.09709400 |
| N | 3.03548300  | 1.64008100  | -0.01824900 |
| C | 3.45628900  | 0.39106900  | 0.37124400  |
| H | 4.28986800  | -0.04627600 | -0.17774100 |
| C | 3.53595500  | 0.16687700  | 1.84554700  |
| C | 4.32043000  | -0.87652100 | 2.36210900  |
| C | 2.87241900  | 1.01737700  | 2.74464800  |
| C | 4.42452600  | -1.07348400 | 3.73889800  |
| H | 4.86055800  | -1.52905200 | 1.68397600  |
| C | 2.97235900  | 0.81527300  | 4.11976000  |
| H | 2.31381700  | 1.86024600  | 2.35112200  |
| C | 3.74645500  | -0.23306100 | 4.62328600  |
| H | 5.04325700  | -1.88182800 | 4.11986800  |
| H | 2.45845000  | 1.48836200  | 4.80180100  |
| H | 3.83148900  | -0.38469700 | 5.69633800  |

H C O N F S O

6-31G\*  
\*\*\*\*  
Fe 0  
LANL2DZ  
\*\*\*\*

Fe 0  
LANL2DZ

### TS<sub>J-k</sub>'

%nprocshared=16  
%mem=1GB  
# freq=noraman b3lyp/gen pseudo=read

Title Card Required

|     |             |             |             |
|-----|-------------|-------------|-------------|
| 0 1 |             |             |             |
| C   | 4.40300000  | -2.79413800 | -0.07027900 |
| C   | 3.21834300  | -2.85942800 | 0.74038000  |
| C   | 3.25377000  | -1.76317100 | 1.66215900  |
| C   | 5.17781000  | -1.66351600 | 0.36239700  |
| C   | 4.46469400  | -1.02280900 | 1.42743700  |
| Fe  | 3.31069700  | -1.05203200 | -0.30522300 |
| C   | 4.63191800  | 4.74286200  | -0.19290300 |
| C   | 4.15249200  | 4.90091700  | 1.25708500  |
| C   | 2.87826700  | 4.04999300  | 1.29336800  |
| N   | 3.14414200  | 2.97000900  | 0.32219800  |
| C   | 4.32550200  | 3.27214000  | -0.50769800 |
| C   | 2.28428200  | 1.94651500  | 0.13366600  |
| C   | 1.04973700  | 1.91077200  | 0.81969900  |
| C   | 0.06838400  | 0.98251100  | 0.51973100  |
| N   | 0.24363900  | -0.03468000 | -0.34297900 |
| C   | 1.48028300  | -0.13392100 | -0.97966900 |
| C   | 2.51693300  | 0.86322200  | -0.79490200 |
| H   | 5.69075200  | 4.98004100  | -0.32876600 |
| H   | 4.05215000  | 5.39440500  | -0.85655200 |
| H   | 4.89728200  | 4.49548300  | 1.95218000  |
| H   | 3.95974500  | 5.93969000  | 1.53793500  |
| H   | 2.67544900  | 3.63030400  | 2.28400400  |
| H   | 1.99743400  | 4.62731900  | 0.98114600  |
| H   | 5.16506200  | 2.62225300  | -0.22633900 |
| H   | 4.10062100  | 3.11086000  | -1.56419200 |
| H   | 0.76589000  | 2.71338000  | 1.48528800  |
| H   | -0.93700800 | 1.11029100  | 0.90844200  |
| C   | 3.22906100  | -0.69941600 | -2.35090200 |
| H   | 3.83950500  | -1.23117300 | -3.06843200 |
| C   | 3.61523800  | 0.47601600  | -1.65074800 |
| H   | 4.56229400  | 0.97770400  | -1.76305900 |
| C   | 1.93771700  | -1.10585100 | -1.91068400 |
| H   | 1.37564700  | -1.95616400 | -2.26260500 |
| C   | 4.78896800  | -3.77828700 | -1.13749300 |

|   |             |             |             |
|---|-------------|-------------|-------------|
| H | 5.31810600  | -4.63907500 | -0.70583100 |
| H | 3.91198500  | -4.16595500 | -1.66554800 |
| H | 5.45293900  | -3.32984800 | -1.88322800 |
| C | 6.52040500  | -1.25813200 | -0.17606400 |
| H | 7.33047300  | -1.76552700 | 0.36574900  |
| H | 6.62812000  | -1.51506300 | -1.23484600 |
| H | 6.68939400  | -0.18070500 | -0.07764200 |
| C | 4.93902000  | 0.15726700  | 2.22738700  |
| H | 5.52279400  | -0.17004900 | 3.09906100  |
| H | 5.58332300  | 0.81726200  | 1.63717600  |
| H | 4.10347500  | 0.75555100  | 2.60441200  |
| C | 2.25197600  | -1.47137200 | 2.74223300  |
| H | 2.57172500  | -1.90866000 | 3.69834100  |
| H | 2.12554400  | -0.39550200 | 2.90008500  |
| H | 1.26895000  | -1.88499900 | 2.50560100  |
| C | 2.16752500  | -3.92993900 | 0.66466200  |
| H | 2.04551400  | -4.30772000 | -0.35516100 |
| H | 2.43522500  | -4.78493400 | 1.30086800  |
| H | 1.19153800  | -3.56747600 | 0.99878500  |
| C | -0.92853300 | -0.80874800 | -0.94043800 |
| O | -0.89953700 | -0.85972600 | -2.15313600 |
| C | -1.92051400 | -1.38530700 | -0.03570300 |
| C | -2.68668000 | -2.51052700 | -0.68096800 |
| C | -2.89561400 | -3.72836200 | -0.00523100 |
| C | -3.26547100 | -2.38135900 | -1.96381100 |
| C | -3.63748400 | -4.76506500 | -0.57569900 |
| H | -2.47740200 | -3.88361500 | 0.98266000  |
| C | -4.00987700 | -3.41551500 | -2.52815400 |
| H | -3.13031300 | -1.46523200 | -2.52456200 |
| C | -4.20234500 | -4.61666800 | -1.84101200 |
| H | -3.77254100 | -5.69056400 | -0.02089000 |
| H | -4.44388800 | -3.27675800 | -3.51527600 |
| H | -4.78376000 | -5.42054100 | -2.28495100 |
| C | -1.47429700 | -1.66085900 | 1.39611000  |
| H | -2.32554200 | -1.97365000 | 2.00394600  |
| H | -0.72577900 | -2.46475100 | 1.44482200  |
| H | -1.04923200 | -0.78630200 | 1.88888200  |
| S | -2.76351600 | 2.30502400  | -1.08642000 |
| O | -1.48497200 | 3.03623600  | -1.08809700 |
| O | -3.23445200 | 1.66542700  | -2.32726800 |
| C | -4.03237300 | 3.62442200  | -0.72446400 |
| F | -5.25047400 | 3.08009400  | -0.60535400 |
| F | -4.05565000 | 4.51302700  | -1.72722000 |
| F | -3.73774200 | 4.27178600  | 0.41136600  |
| N | -2.89242200 | 1.39175300  | 0.24617200  |
| C | -3.41717000 | 0.13966200  | 0.10804300  |
| H | -3.82079400 | -0.13664900 | -0.86513200 |
| C | -4.20689100 | -0.35490000 | 1.26870000  |
| C | -5.14999400 | -1.38286800 | 1.09960400  |
| C | -4.06996900 | 0.23015300  | 2.53945500  |
| C | -5.92110600 | -1.82375200 | 2.17581600  |
| H | -5.28797300 | -1.82745200 | 0.11978200  |
| C | -4.83640500 | -0.21572000 | 3.61384800  |
| H | -3.37597000 | 1.05514300  | 2.66038100  |

|   |             |             |            |
|---|-------------|-------------|------------|
| C | -5.76323500 | -1.24751400 | 3.43759500 |
| H | -6.65124500 | -2.61434300 | 2.02392900 |
| H | -4.72053000 | 0.25062600  | 4.58913300 |
| H | -6.36605800 | -1.59020700 | 4.27474300 |

H C O N F S O

6-31G\*

\*\*\*\*

Fe 0

LANL2DZ

\*\*\*\*

Fe 0

LANL2DZ

## Intermediate K

%nprocshared=16

%mem=1GB

# opt freq=noraman b3lyp/gen pseudo=read

Title Card Required

0 1

|    |             |             |             |
|----|-------------|-------------|-------------|
| C  | -4.04744600 | -2.78889200 | -0.80537800 |
| C  | -2.88795400 | -2.41743200 | -1.56856200 |
| C  | -3.05782700 | -1.06077600 | -1.99636800 |
| C  | -4.94159600 | -1.66396900 | -0.77605700 |
| C  | -4.32686100 | -0.59465600 | -1.50436500 |
| Fe | -3.12029900 | -1.17152700 | 0.09454400  |
| C  | -4.97359700 | 4.07867600  | 2.13053100  |
| C  | -4.54810100 | 4.79840900  | 0.84309600  |
| C  | -3.19619000 | 4.15431400  | 0.51658900  |
| N  | -3.32484000 | 2.77406100  | 1.03415000  |
| C  | -4.51656400 | 2.63289700  | 1.89381800  |
| C  | -2.37553600 | 1.84044200  | 0.83460800  |
| C  | -1.15693100 | 2.18287300  | 0.19607600  |
| C  | -0.09476400 | 1.30742100  | 0.10755800  |
| N  | -0.15697500 | 0.02106300  | 0.52582200  |
| C  | -1.36060500 | -0.42725800 | 1.08066000  |
| C  | -2.48271700 | 0.47079300  | 1.28603200  |
| H  | -6.04684400 | 4.14196500  | 2.32947600  |
| H  | -4.44484900 | 4.50004100  | 2.99307700  |
| H  | -5.26555000 | 4.59899000  | 0.03856500  |
| H  | -4.46653500 | 5.88200900  | 0.96048100  |
| H  | -2.97794500 | 4.13908200  | -0.55542200 |
| H  | -2.36973900 | 4.66890200  | 1.02446000  |
| H  | -5.29002100 | 2.05049600  | 1.37634500  |
| H  | -4.25712900 | 2.11905300  | 2.82201600  |
| H  | -0.97060000 | 3.19523300  | -0.13499300 |
| H  | 0.90976300  | 1.63936800  | -0.18672900 |
| C  | -3.02004400 | -1.62351400 | 2.12039800  |
| H  | -3.56363800 | -2.44062400 | 2.57525000  |
| C  | -3.52028400 | -0.30855200 | 1.92311900  |

|   |             |             |             |
|---|-------------|-------------|-------------|
| H | -4.50191800 | 0.02760900  | 2.21483400  |
| C | -1.71049600 | -1.71597200 | 1.56695700  |
| H | -1.08052100 | -2.59141600 | 1.56066600  |
| C | -4.30899200 | -4.14184400 | -0.20733800 |
| H | -4.79458100 | -4.80478800 | -0.93654100 |
| H | -3.38210000 | -4.63063800 | 0.10888300  |
| H | -4.96739600 | -4.08064000 | 0.66499100  |
| C | -6.30096800 | -1.63917900 | -0.13712400 |
| H | -7.06629600 | -2.01114600 | -0.83192500 |
| H | -6.34238000 | -2.26834600 | 0.75792800  |
| H | -6.59464100 | -0.62612000 | 0.15596000  |
| C | -4.92848000 | 0.75215600  | -1.78854600 |
| H | -5.44206200 | 0.75441800  | -2.75981000 |
| H | -5.66733100 | 1.03602100  | -1.03204200 |
| H | -4.16611700 | 1.53708900  | -1.82428500 |
| C | -2.13110500 | -0.27420000 | -2.87821900 |
| H | -2.44901800 | -0.33872700 | -3.92789200 |
| H | -2.11059900 | 0.78627100  | -2.60807900 |
| H | -1.10490900 | -0.64327200 | -2.82465500 |
| C | -1.73476500 | -3.32256500 | -1.89512100 |
| H | -1.52006900 | -4.01666400 | -1.07666100 |
| H | -1.95246800 | -3.92507300 | -2.78750500 |
| H | -0.81867000 | -2.76172100 | -2.09743300 |
| C | 1.09331100  | -0.77664300 | 0.78062600  |
| O | 1.14524000  | -1.30025900 | 1.86293200  |
| C | 2.18030300  | -0.88880500 | -0.29598400 |
| C | 2.75101600  | -2.33447300 | -0.36353100 |
| C | 3.76678000  | -2.58337100 | -1.30719600 |
| C | 2.29472000  | -3.42958700 | 0.38392500  |
| C | 4.30411300  | -3.85595200 | -1.48970800 |
| H | 4.15991300  | -1.77146400 | -1.91023500 |
| C | 2.82708100  | -4.70919500 | 0.19727600  |
| H | 1.54084800  | -3.29693100 | 1.14719800  |
| C | 3.83367400  | -4.93355600 | -0.73793400 |
| H | 5.09302600  | -4.00070300 | -2.22311900 |
| H | 2.45038700  | -5.53073000 | 0.80154900  |
| H | 4.24924600  | -5.92791600 | -0.87694200 |
| C | 1.64197400  | -0.56516500 | -1.71011000 |
| H | 2.45137800  | -0.63231500 | -2.43712100 |
| H | 0.87803400  | -1.29541000 | -1.99752300 |
| H | 1.23445500  | 0.43822400  | -1.79969000 |
| S | 3.63489100  | 2.67840500  | -0.57702700 |
| O | 3.09388500  | 3.96571500  | -0.11318300 |
| O | 5.09158600  | 2.45067800  | -0.60773200 |
| C | 3.19961000  | 2.72524500  | -2.39884700 |
| F | 3.62270000  | 1.60251200  | -3.02524100 |
| F | 3.74038100  | 3.77459500  | -3.02895500 |
| F | 1.85357700  | 2.79110800  | -2.56964200 |
| N | 2.77243100  | 1.48953900  | 0.00639100  |
| C | 3.35066400  | 0.16538100  | 0.09575400  |
| H | 4.12658200  | -0.00552200 | -0.66148900 |
| C | 3.98264400  | -0.11865200 | 1.46260900  |
| C | 5.01164200  | -1.06090300 | 1.59883200  |
| C | 3.57688700  | 0.59083700  | 2.60043200  |

|   |            |             |            |
|---|------------|-------------|------------|
| C | 5.60217700 | -1.30461100 | 2.83948800 |
| H | 5.36682800 | -1.60097500 | 0.72649300 |
| C | 4.16234200 | 0.34674400  | 3.84284900 |
| H | 2.82252300 | 1.36291000  | 2.49095000 |
| C | 5.17486200 | -0.60589100 | 3.96960900 |
| H | 6.40541100 | -2.03321600 | 2.91871300 |
| H | 3.83508800 | 0.91277300  | 4.71179700 |
| H | 5.63818200 | -0.78998600 | 4.93587400 |

H C O N F S O

6-31G\*

\*\*\*\*

Fe 0

LANL2DZ

\*\*\*\*

Fe 0

LANL2DZ

## Intermediate K'

%nprocshared=16

%mem=1GB

# opt freq=noraman b3lyp/gen pseudo=read

Title Card Required

0 1

|    |            |             |             |
|----|------------|-------------|-------------|
| C  | 4.34430400 | -2.72015300 | 0.28604800  |
| C  | 3.14301100 | -2.66487400 | 1.07301600  |
| C  | 3.19135400 | -1.47419900 | 1.86811100  |
| C  | 5.14235600 | -1.56854200 | 0.60926700  |
| C  | 4.42575300 | -0.79491300 | 1.57901300  |
| Fe | 3.30352900 | -0.99037800 | -0.16738500 |
| C  | 4.89719100 | 4.70765400  | -0.70075700 |
| C  | 4.42832700 | 5.03799200  | 0.72317000  |
| C  | 3.11422300 | 4.25975900  | 0.84369700  |
| N  | 3.32644300 | 3.07039100  | -0.00838500 |
| C  | 4.52038400 | 3.22809700  | -0.86198900 |
| C  | 2.42674400 | 2.07061600  | -0.08272300 |
| C  | 1.19207500 | 2.16281500  | 0.60560400  |
| C  | 0.16394500 | 1.26457600  | 0.40061100  |
| N  | 0.29054100 | 0.15523700  | -0.36265900 |
| C  | 1.52657800 | -0.07661300 | -0.97118600 |
| C  | 2.60876300 | 0.88434100  | -0.88920900 |
| H  | 5.96593000 | 4.87771800  | -0.85693300 |
| H  | 4.34846100 | 5.31333100  | -1.43079900 |
| H  | 5.15347800 | 4.67076000  | 1.45898100  |
| H  | 4.28721800 | 6.10835600  | 0.89410100  |
| H  | 2.89125600 | 3.95663400  | 1.87138300  |
| H  | 2.26224400 | 4.84148200  | 0.46738300  |

|   |             |             |             |
|---|-------------|-------------|-------------|
| H | 5.32700100  | 2.57163300  | -0.50992600 |
| H | 4.28594900  | 2.96649700  | -1.89619000 |
| H | 0.94907900  | 3.04247600  | 1.18459500  |
| H | -0.85152100 | 1.46072100  | 0.74069600  |
| C | 3.25659000  | -0.88213700 | -2.24273300 |
| H | 3.84700500  | -1.52399400 | -2.88260700 |
| C | 3.69307500  | 0.34831300  | -1.68065700 |
| H | 4.66498600  | 0.78766900  | -1.83667000 |
| C | 1.94225600  | -1.17142900 | -1.77604600 |
| H | 1.34483300  | -2.03341800 | -2.03107300 |
| C | 4.72648700  | -3.82538200 | -0.65677600 |
| H | 5.24261500  | -4.63583300 | -0.12402400 |
| H | 3.84847600  | -4.26196700 | -1.14322900 |
| H | 5.40032300  | -3.47221200 | -1.44378400 |
| C | 6.50502000  | -1.26057600 | 0.05698900  |
| H | 7.28910500  | -1.74731900 | 0.65292800  |
| H | 6.61476700  | -1.61298200 | -0.97355100 |
| H | 6.71365700  | -0.18575900 | 0.06261300  |
| C | 4.89500300  | 0.46747100  | 2.24320700  |
| H | 5.36911900  | 0.25118900  | 3.21049500  |
| H | 5.63206300  | 0.99858300  | 1.63271000  |
| H | 4.06253900  | 1.15224200  | 2.43419800  |
| C | 2.18954600  | -1.04101900 | 2.89951700  |
| H | 2.51133900  | -1.34861100 | 3.90414000  |
| H | 2.06149900  | 0.04611000  | 2.91616400  |
| H | 1.20672300  | -1.48345900 | 2.72323900  |
| C | 2.06753700  | -3.71267500 | 1.09924200  |
| H | 1.95074400  | -4.19981500 | 0.12658600  |
| H | 2.30538900  | -4.49633100 | 1.83183300  |
| H | 1.09522500  | -3.29455800 | 1.37313700  |
| C | -0.91827500 | -0.54285600 | -0.94386600 |
| O | -0.90202400 | -0.65632800 | -2.13893100 |
| C | -2.00622900 | -1.16358300 | -0.02862800 |
| C | -2.29365600 | -2.58319100 | -0.57108100 |
| C | -2.07652800 | -3.72908000 | 0.20845100  |
| C | -2.79416200 | -2.76949700 | -1.87384400 |
| C | -2.35057600 | -5.00857800 | -0.28410900 |
| H | -1.70125900 | -3.64151200 | 1.22131500  |
| C | -3.06768100 | -4.04447100 | -2.36667100 |
| H | -2.96326200 | -1.91340200 | -2.51483200 |
| C | -2.84815100 | -5.17379200 | -1.57447000 |
| H | -2.17699400 | -5.87337000 | 0.35137400  |
| H | -3.45702900 | -4.15250600 | -3.37564600 |
| H | -3.06570500 | -6.16695500 | -1.95851700 |
| C | -1.58468700 | -1.19271200 | 1.44802200  |
| H | -2.33743100 | -1.72240200 | 2.03523500  |
| H | -0.62140800 | -1.69230400 | 1.58739900  |
| H | -1.51793900 | -0.18336700 | 1.85292300  |
| S | -3.01787800 | 2.33675800  | -0.94337700 |
| O | -1.93318300 | 3.33520500  | -0.84486900 |
| O | -3.50559400 | 1.93509800  | -2.27846300 |
| C | -4.47412700 | 3.25177400  | -0.21523100 |
| F | -5.56767500 | 2.47019700  | -0.21147600 |
| F | -4.75079600 | 4.36148100  | -0.91655400 |

|   |             |             |             |
|---|-------------|-------------|-------------|
| F | -4.21996600 | 3.61497700  | 1.05758200  |
| N | -2.70693300 | 1.14894600  | 0.05639700  |
| C | -3.25373200 | -0.17267600 | -0.20154000 |
| H | -3.59021400 | -0.26991900 | -1.24043600 |
| C | -4.41674900 | -0.54691000 | 0.72081500  |
| C | -5.28402800 | -1.60142100 | 0.39759600  |
| C | -4.65089000 | 0.16822200  | 1.90316100  |
| C | -6.34176500 | -1.94392500 | 1.24137700  |
| H | -5.13969200 | -2.15336100 | -0.52610400 |
| C | -5.70737900 | -0.17349700 | 2.74900500  |
| H | -4.01497800 | 1.01761700  | 2.12819900  |
| C | -6.55439100 | -1.23493200 | 2.42527100  |
| H | -7.00594100 | -2.75994000 | 0.96698400  |
| H | -5.87532500 | 0.39984600  | 3.65765800  |
| H | -7.38114600 | -1.49756400 | 3.08069400  |

H C O N F S 0

6-31G\*

\*\*\*\*

Fe 0

LANL2DZ

\*\*\*\*

Fe 0

LANL2DZ

**TS<sub>K-L</sub>**

%nprocshared=16

%mem=1GB

# opt=(ts,calcfc,noeigen) freq=noraman b3lyp/gen pseudo=read

Title Card Required

0 1

|    |            |             |             |
|----|------------|-------------|-------------|
| C  | 3.82661900 | -3.02464400 | 0.22880600  |
| C  | 2.77801700 | -2.77193100 | 1.17862100  |
| C  | 3.07120700 | -1.53484600 | 1.83825300  |
| C  | 4.77543100 | -1.94759800 | 0.31445700  |
| C  | 4.30346000 | -1.02407900 | 1.30183400  |
| Fe | 2.90419800 | -1.22915900 | -0.22821100 |
| C  | 5.32121700 | 3.94622100  | -1.74136700 |
| C  | 5.20014900 | 4.47699800  | -0.30584800 |
| C  | 3.81314400 | 3.98825800  | 0.12654200  |
| N  | 3.63899200 | 2.72160200  | -0.60726900 |
| C  | 4.65507200 | 2.56501200  | -1.66357900 |
| C  | 2.56710900 | 1.91940100  | -0.41106500 |
| C  | 1.52261500 | 2.31241000  | 0.45249300  |
| C  | 0.33042300 | 1.60152800  | 0.52431600  |
| N  | 0.10647700 | 0.43896800  | -0.09293700 |
| C  | 1.15428900 | -0.08844500 | -0.83643500 |
| C  | 2.38178200 | 0.65079400  | -1.07600000 |
| H  | 6.35372000 | 3.88543500  | -2.09665000 |
| H  | 4.76442800 | 4.59040300  | -2.43157600 |
| H  | 5.97229100 | 4.03062500  | 0.33196300  |



|   |             |             |             |
|---|-------------|-------------|-------------|
| H | 5.29328400  | 5.56414100  | -0.23673400 |
| H | 3.74130400  | 3.81772600  | 1.20587400  |
| H | 3.02705000  | 4.70240000  | -0.15648700 |
| H | 5.38109000  | 1.78928400  | -1.38474300 |
| H | 4.18577600  | 2.27436400  | -2.60644900 |
| H | 1.55913600  | 3.26023800  | 0.97104600  |
| H | -0.50523900 | 2.01454000  | 1.06582800  |
| C | 2.45502000  | -1.34291200 | -2.25279800 |
| H | 2.79716800  | -2.15084100 | -2.88595200 |
| C | 3.18822800  | -0.15998200 | -1.95990600 |
| H | 4.16705900  | 0.07264900  | -2.34733200 |
| C | 1.23004300  | -1.32940100 | -1.52808000 |
| H | 0.46075800  | -2.08497100 | -1.54786300 |
| C | 3.94851700  | -4.24137800 | -0.64410200 |
| H | 4.47168700  | -5.05177900 | -0.11761300 |
| H | 2.96801600  | -4.62635300 | -0.94151400 |
| H | 4.51305500  | -4.03025600 | -1.55802000 |
| C | 6.06124100  | -1.84215800 | -0.45494300 |
| H | 6.87859800  | -2.35182500 | 0.07383300  |
| H | 5.98165500  | -2.29917200 | -1.44658300 |
| H | 6.36612600  | -0.79961900 | -0.59402300 |
| C | 5.00380300  | 0.21756600  | 1.77580500  |
| H | 5.65450700  | -0.00175600 | 2.63403900  |
| H | 5.63415000  | 0.65567900  | 0.99504400  |
| H | 4.29003900  | 0.98343300  | 2.09646900  |
| C | 2.30093300  | -0.90253700 | 2.96254600  |
| H | 2.86708100  | -0.96359300 | 3.90203800  |
| H | 2.09119400  | 0.15621400  | 2.77438300  |
| H | 1.34510300  | -1.40466200 | 3.12766500  |
| C | 1.61968000  | -3.68485500 | 1.46298300  |
| H | 1.32142600  | -4.25083900 | 0.57576200  |
| H | 1.87899700  | -4.41219400 | 2.24511400  |
| H | 0.73650400  | -3.13754400 | 1.80149900  |
| C | -1.40367400 | -0.10223400 | -0.48034000 |
| O | -1.44618800 | -0.38543500 | -1.66220800 |
| C | -2.17797500 | -0.88866500 | 0.66293900  |
| C | -2.41476700 | -2.37104300 | 0.36167500  |
| C | -2.30617200 | -3.34379600 | 1.37213200  |
| C | -2.76559200 | -2.82205000 | -0.92587600 |
| C | -2.53255000 | -4.69827700 | 1.11632500  |
| H | -2.04541800 | -3.05855600 | 2.38459000  |
| C | -2.98686100 | -4.17506900 | -1.18349000 |
| H | -2.85116200 | -2.10947800 | -1.73236600 |
| C | -2.87309500 | -5.12344300 | -0.16625800 |
| H | -2.44239500 | -5.41696700 | 1.92717500  |
| H | -3.25679200 | -4.48472800 | -2.18997400 |
| H | -3.05126600 | -6.17633100 | -0.36964900 |
| C | -1.53898800 | -0.67129300 | 2.04322500  |
| H | -2.18471200 | -1.07040600 | 2.83117300  |
| H | -0.56206600 | -1.15451200 | 2.12049000  |
| H | -1.41526500 | 0.39398600  | 2.24320900  |
| S | -2.94293900 | 2.69738500  | -0.32777000 |
| O | -1.76316400 | 3.33354000  | -0.92759200 |
| O | -4.27016500 | 2.87053000  | -0.92298500 |

|   |             |             |             |
|---|-------------|-------------|-------------|
| C | -3.12597500 | 3.52643700  | 1.34441000  |
| F | -4.09551700 | 2.92951600  | 2.05723100  |
| F | -3.42540400 | 4.82031000  | 1.20753700  |
| F | -1.97864400 | 3.43557800  | 2.05627200  |
| N | -2.53379600 | 1.19125600  | 0.07483600  |
| C | -3.40965100 | 0.11790300  | 0.58130000  |
| H | -3.76292200 | 0.33575600  | 1.59659200  |
| C | -4.61569900 | -0.28678000 | -0.24550400 |
| C | -5.70087500 | -0.87511700 | 0.41690200  |
| C | -4.68772600 | -0.11777900 | -1.63419800 |
| C | -6.82832500 | -1.30060900 | -0.28643800 |
| H | -5.66443200 | -0.99925400 | 1.49758400  |
| C | -5.81570000 | -0.53817000 | -2.33865400 |
| H | -3.85974200 | 0.34182300  | -2.16068300 |
| C | -6.88858700 | -1.13238500 | -1.67040400 |
| H | -7.65980400 | -1.75373500 | 0.24748400  |
| H | -5.85834800 | -0.39269400 | -3.41502100 |
| H | -7.76795800 | -1.45348100 | -2.22299200 |

H C O N F S O

6-31G\*

\*\*\*\*\*

Fe 0

LANL2DZ

\*\*\*\*\*

Fe 0

LANL2DZ

**TS<sub>k</sub>'-L'**

%nprocshared=16

%mem=1GB

# opt=(ts,calcfc,noeigen) freq=noraman b3lyp/gen pseudo=read

Title Card Required

0 1

|    |            |             |             |
|----|------------|-------------|-------------|
| C  | 4.07001600 | -2.78055000 | 0.53905900  |
| C  | 2.84589600 | -2.73378400 | 1.28966900  |
| C  | 2.83657700 | -1.51543500 | 2.04316300  |
| C  | 4.82876900 | -1.59936300 | 0.84784700  |
| C  | 4.06182800 | -0.81408600 | 1.76699900  |
| Fe | 3.00192900 | -1.09401800 | -0.00547000 |
| C  | 5.18162800 | 4.31218200  | -1.11658100 |
| C  | 4.81164200 | 4.82680500  | 0.28172000  |
| C  | 3.43290300 | 4.20193700  | 0.52510600  |
| N  | 3.48594100 | 2.92585900  | -0.21078900 |
| C  | 4.64924300 | 2.87237400  | -1.11449900 |
| C  | 2.46363900 | 2.03817700  | -0.18662300 |
| C  | 1.26893700 | 2.32970100  | 0.50548100  |
| C  | 0.13406400 | 1.53597100  | 0.36683500  |
| N  | 0.10420000 | 0.38073200  | -0.30090500 |

|   |             |             |             |
|---|-------------|-------------|-------------|
| C | 1.29407300  | -0.05067500 | -0.86452300 |
| C | 2.48776700  | 0.77483600  | -0.88704700 |
| H | 6.25425200  | 4.35429400  | -1.32556500 |
| H | 4.66500500  | 4.89908600  | -1.88473000 |
| H | 5.52877700  | 4.46031900  | 1.02583500  |
| H | 4.78574700  | 5.91778600  | 0.34849300  |
| H | 3.22898600  | 4.02457500  | 1.58642800  |
| H | 2.62747900  | 4.83518800  | 0.12685500  |
| H | 5.40269100  | 2.17150300  | -0.72949100 |
| H | 4.34608300  | 2.53958100  | -2.10969000 |
| H | 1.15516100  | 3.26128600  | 1.04254400  |
| H | -0.81920600 | 1.86639400  | 0.75689500  |
| C | 2.88636500  | -1.17216500 | -2.07943100 |
| H | 3.38083400  | -1.93409600 | -2.66712800 |
| C | 3.48040600  | 0.04505500  | -1.64278200 |
| H | 4.49251700  | 0.34981500  | -1.85523400 |
| C | 1.56247200  | -1.25947100 | -1.56462800 |
| H | 0.85669100  | -2.05928800 | -1.73159200 |
| C | 4.51270000  | -3.91229400 | -0.34425900 |
| H | 5.06933500  | -4.66579000 | 0.23042800  |
| H | 3.65987400  | -4.41993400 | -0.80598100 |
| H | 5.16946700  | -3.56745100 | -1.14948700 |
| C | 6.20736800  | -1.28255600 | 0.34159300  |
| H | 6.97464300  | -1.71181100 | 1.00073200  |
| H | 6.37734700  | -1.68982900 | -0.66026100 |
| H | 6.38835200  | -0.20338400 | 0.29614100  |
| C | 4.47778000  | 0.47977800  | 2.40616700  |
| H | 4.93504500  | 0.30379700  | 3.38983800  |
| H | 5.21151700  | 1.01788200  | 1.79793600  |
| H | 3.62048300  | 1.14365600  | 2.55806600  |
| C | 1.80169800  | -1.06864500 | 3.03645700  |
| H | 2.14195500  | -1.26210200 | 4.06336500  |
| H | 1.59705000  | 0.00453300  | 2.95768000  |
| H | 0.85314300  | -1.59298100 | 2.90283700  |
| C | 1.81722700  | -3.82755300 | 1.32791700  |
| H | 1.63946100  | -4.25680400 | 0.33692000  |
| H | 2.14535800  | -4.64403700 | 1.98618400  |
| H | 0.85694200  | -3.47015800 | 1.70726800  |
| C | -1.28225000 | -0.19076600 | -1.01944700 |
| O | -1.13903300 | -0.22911100 | -2.22394200 |
| C | -2.11630600 | -1.24432600 | -0.18960600 |
| C | -2.30297900 | -2.57495000 | -0.91734600 |
| C | -2.02919400 | -3.80532800 | -0.29894700 |
| C | -2.78504400 | -2.60563400 | -2.24041700 |
| C | -2.22867200 | -5.01725600 | -0.96628000 |
| H | -1.66507200 | -3.83590400 | 0.72175200  |
| C | -2.98313200 | -3.81332300 | -2.90759300 |
| H | -2.97983700 | -1.67576000 | -2.76046400 |
| C | -2.70782400 | -5.02771900 | -2.27461100 |
| H | -2.01346300 | -5.95174600 | -0.45386400 |
| H | -3.35380300 | -3.80259200 | -3.92930400 |
| H | -2.86714200 | -5.96853400 | -2.79518300 |
| C | -1.58052700 | -1.40535400 | 1.23308200  |
| H | -2.25078700 | -2.02356400 | 1.83705800  |

|   |             |             |             |
|---|-------------|-------------|-------------|
| H | -0.59074800 | -1.86810600 | 1.21963700  |
| H | -1.49331700 | -0.43689000 | 1.72833700  |
| S | -3.06542200 | 2.18176200  | -1.25329000 |
| O | -1.87967000 | 2.90226200  | -1.72863100 |
| O | -4.17315200 | 1.84555600  | -2.15580900 |
| C | -3.81465300 | 3.37090800  | -0.01273500 |
| F | -4.96971300 | 2.90614600  | 0.47425900  |
| F | -4.03733100 | 4.55042200  | -0.60162000 |
| F | -2.96536100 | 3.56579200  | 1.01803500  |
| N | -2.55807700 | 0.93567100  | -0.32119800 |
| C | -3.37535700 | -0.29441000 | -0.21444100 |
| H | -3.93109200 | -0.47046600 | -1.14058800 |
| C | -4.33391600 | -0.40285200 | 0.95162300  |
| C | -5.34093800 | -1.37860900 | 0.90364700  |
| C | -4.23254300 | 0.40012200  | 2.09410700  |
| C | -6.21741900 | -1.55516000 | 1.97417400  |
| H | -5.43707400 | -2.00174200 | 0.01769800  |
| C | -5.11314400 | 0.22934200  | 3.16398700  |
| H | -3.47484000 | 1.17532000  | 2.13129900  |
| C | -6.10552100 | -0.75079400 | 3.11069200  |
| H | -6.99283100 | -2.31480700 | 1.91695200  |
| H | -5.02576600 | 0.86853700  | 4.03909700  |
| H | -6.79208500 | -0.88103100 | 3.94321200  |

H C O N F S O

6-31G\*

\*\*\*\*

Fe 0

LANL2DZ

\*\*\*\*

Fe 0

LANL2DZ

## Product L + catalyst

%nprocshared=16

%mem=800MB

# opt freq=noraman b3lyp/gen pseudo=read

Title Card Required

0 1

|    |            |             |             |
|----|------------|-------------|-------------|
| C  | 4.90182200 | -2.83606400 | -0.68275500 |
| C  | 3.95554300 | -3.23812500 | 0.32183100  |
| C  | 3.95589300 | -2.24376000 | 1.35372200  |
| C  | 5.49599200 | -1.59560300 | -0.26331100 |
| C  | 4.90931200 | -1.22854200 | 0.99113600  |
| Fe | 3.43786900 | -1.39084300 | -0.47183500 |
| C  | 4.00071100 | 4.55263600  | -0.93480000 |
| C  | 4.07856500 | 4.74725100  | 0.58649800  |
| C  | 3.03766500 | 3.75284800  | 1.11268300  |
| N  | 3.07938600 | 2.65228900  | 0.14197800  |

|   |             |             |             |
|---|-------------|-------------|-------------|
| C | 3.78251800  | 3.03903100  | -1.08972200 |
| C | 2.32724900  | 1.52326900  | 0.30988600  |
| C | 1.47445800  | 1.37496000  | 1.40996300  |
| C | 0.62575700  | 0.25177700  | 1.53190100  |
| N | 0.54968000  | -0.76213600 | 0.68874400  |
| C | 1.41006600  | -0.68127300 | -0.37489600 |
| C | 2.32342700  | 0.42440100  | -0.63125700 |
| H | 4.89363000  | 4.89819500  | -1.46401800 |
| H | 3.13935100  | 5.09710700  | -1.33960700 |
| H | 5.07576500  | 4.47771700  | 0.95484200  |
| H | 3.86924900  | 5.77306700  | 0.90291800  |
| H | 3.27263700  | 3.38957500  | 2.11956800  |
| H | 2.03137200  | 4.19838300  | 1.14518300  |
| H | 4.74086300  | 2.50706200  | -1.17576700 |
| H | 3.18398900  | 2.79955200  | -1.97313500 |
| H | 1.38614900  | 2.15700900  | 2.15285200  |
| H | -0.06152000 | 0.22488400  | 2.37610200  |
| C | 2.55438800  | -1.14065500 | -2.33176300 |
| H | 2.90609700  | -1.64086600 | -3.22503300 |
| C | 3.04733000  | 0.10437000  | -1.84042700 |
| H | 3.81067400  | 0.69511200  | -2.32276500 |
| C | 1.59124900  | -1.65001100 | -1.41503400 |
| H | 1.06454600  | -2.59236300 | -1.48408300 |
| C | 5.26216600  | -3.61331200 | -1.91732800 |
| H | 6.09053000  | -4.30860400 | -1.72032500 |
| H | 4.41842300  | -4.20880600 | -2.28120500 |
| H | 5.57782300  | -2.95490600 | -2.73351900 |
| C | 6.58565900  | -0.85525400 | -0.98564800 |
| H | 7.57822300  | -1.22370700 | -0.69004600 |
| H | 6.50547300  | -0.97388600 | -2.07126000 |
| H | 6.56071800  | 0.21754300  | -0.76762800 |
| C | 5.26052800  | -0.02813600 | 1.82340200  |
| H | 6.03675200  | -0.27311000 | 2.56206100  |
| H | 5.64125800  | 0.79419300  | 1.20912100  |
| H | 4.39076700  | 0.34668000  | 2.37273300  |
| C | 3.13906900  | -2.26755300 | 2.61332800  |
| H | 3.70450900  | -2.71501000 | 3.44295900  |
| H | 2.84408900  | -1.25896400 | 2.91922800  |
| H | 2.21990200  | -2.84622900 | 2.48570900  |
| C | 3.13541600  | -4.49680100 | 0.30872900  |
| H | 2.89474200  | -4.81165300 | -0.71190900 |
| H | 3.67393600  | -5.32578800 | 0.78922100  |
| H | 2.19012400  | -4.36427300 | 0.84390400  |
| C | -3.67646600 | -0.40056900 | -1.28588400 |
| S | -2.81020700 | 2.64152100  | 0.77674800  |
| O | -3.84195800 | 3.66552100  | 0.78488300  |
| O | -2.11093100 | 2.19632000  | 1.97490700  |
| N | -3.37808100 | 1.26758900  | -0.01112900 |
| C | -2.95924500 | -0.16832100 | 0.12525600  |
| C | -4.86701400 | -1.33947800 | -1.35342200 |
| C | -4.70978400 | -2.69113400 | -1.01043300 |
| C | -6.11597800 | -0.90179800 | -1.81380300 |
| C | -5.77759400 | -3.58062800 | -1.11539400 |
| H | -3.75107800 | -3.04771000 | -0.64457500 |

|   |             |             |             |
|---|-------------|-------------|-------------|
| C | -7.18524100 | -1.79502600 | -1.91965300 |
| H | -6.25195400 | 0.13546500  | -2.10281500 |
| C | -7.02103000 | -3.13505700 | -1.57059300 |
| H | -5.63863900 | -4.62209400 | -0.83782000 |
| H | -8.14693700 | -1.43782400 | -2.27830600 |
| H | -7.85366300 | -3.82857300 | -1.65237200 |
| H | -1.87609000 | -0.27494600 | 0.03392200  |
| C | -3.43651000 | -0.86696500 | 1.36890400  |
| C | -2.57435900 | -1.78039600 | 1.99135000  |
| C | -4.71091900 | -0.64822100 | 1.90945400  |
| C | -2.98864900 | -2.47492300 | 3.13007200  |
| H | -1.57359500 | -1.92600800 | 1.58906200  |
| C | -5.11816600 | -1.33698900 | 3.05060600  |
| H | -5.38327900 | 0.06528000  | 1.44205800  |
| C | -4.26008300 | -2.25554900 | 3.66158100  |
| H | -2.31110600 | -3.17786600 | 3.60776600  |
| H | -6.10682700 | -1.15629200 | 3.46379300  |
| H | -4.58007700 | -2.79058000 | 4.55188200  |
| C | -3.99377700 | 1.10768200  | -1.27330500 |
| O | -4.48143800 | 1.90404200  | -2.02958300 |
| C | -2.65791700 | -0.70438600 | -2.40306900 |
| H | -2.28982800 | -1.73092200 | -2.30964500 |
| H | -3.13640300 | -0.59502400 | -3.38113600 |
| H | -1.79979800 | -0.02499300 | -2.35511400 |
| C | -1.48742500 | 3.23402000  | -0.42331100 |
| F | -0.77532300 | 2.18855200  | -0.86340200 |
| F | -0.67808200 | 4.08231600  | 0.21572300  |
| F | -2.05016500 | 3.84626600  | -1.45996900 |

H C O N F S 0

6-31G\*

\*\*\*\*

Fe 0

LANL2DZ

\*\*\*\*

Fe 0

LANL2DZ

## Product L' + catalyst

%nprocshared=16

%mem=800MB

# opt freq=noraman b3lyp/gen pseudo=read

Title Card Required

0 1

|   |            |             |             |
|---|------------|-------------|-------------|
| C | 4.23384300 | -2.77213600 | -0.15311800 |
| C | 3.22804000 | -2.87073500 | 0.86869300  |
| C | 3.37896400 | -1.75033100 | 1.74904600  |
| C | 5.01559200 | -1.59329800 | 0.10537500  |

|    |             |             |             |
|----|-------------|-------------|-------------|
| C  | 4.48643400  | -0.96110000 | 1.27756800  |
| Fe | 3.01925500  | -1.09727100 | -0.19056700 |
| C  | 4.47657600  | 4.60272800  | -1.17958000 |
| C  | 4.54488400  | 4.90681800  | 0.32398400  |
| C  | 3.33201300  | 4.15187700  | 0.88013900  |
| N  | 3.20945200  | 2.98534500  | -0.00115300 |
| C  | 4.01244200  | 3.13860500  | -1.22276800 |
| C  | 2.28147300  | 2.00647900  | 0.22622500  |
| C  | 1.35669500  | 2.10659700  | 1.27119000  |
| C  | 0.36156200  | 1.12132500  | 1.46677100  |
| N  | 0.20011400  | 0.02560300  | 0.74893000  |
| C  | 1.10394600  | -0.12357600 | -0.27094600 |
| C  | 2.16542700  | 0.81987900  | -0.59266900 |
| H  | 5.42869200  | 4.75067400  | -1.69771800 |
| H  | 3.72932400  | 5.24576600  | -1.65958900 |
| H  | 5.46947300  | 4.50210500  | 0.75310900  |
| H  | 4.50844900  | 5.97599600  | 0.55189200  |
| H  | 3.46986700  | 3.83547500  | 1.92059900  |
| H  | 2.42187100  | 4.77071400  | 0.83960300  |
| H  | 4.87211000  | 2.45279700  | -1.21654600 |
| H  | 3.41467000  | 2.92190000  | -2.11270500 |
| H  | 1.34305700  | 2.97472800  | 1.91837100  |
| H  | -0.36045900 | 1.27878900  | 2.26703100  |
| C  | 2.24484600  | -0.93633800 | -2.10911500 |
| H  | 2.55608600  | -1.57070900 | -2.92915800 |
| C  | 2.88478600  | 0.27854500  | -1.72282600 |
| H  | 3.73892600  | 0.70865200  | -2.22231600 |
| C  | 1.18894400  | -1.21427900 | -1.19578300 |
| H  | 0.53459400  | -2.07523600 | -1.20006300 |
| C  | 4.47591900  | -3.76496400 | -1.25472400 |
| H  | 5.17944900  | -4.54728700 | -0.93607800 |
| H  | 3.55133300  | -4.26495200 | -1.56150900 |
| H  | 4.90187600  | -3.28748100 | -2.14336400 |
| C  | 6.21034600  | -1.14101700 | -0.68536200 |
| H  | 7.13596100  | -1.59329900 | -0.30187200 |
| H  | 6.12515300  | -1.42048700 | -1.74066300 |
| H  | 6.33766400  | -0.05421100 | -0.64171600 |
| C  | 5.02495300  | 0.27410900  | 1.94190800  |
| H  | 5.75067700  | 0.01706500  | 2.72646500  |
| H  | 5.53426800  | 0.92906500  | 1.22763700  |
| H  | 4.22668700  | 0.85783100  | 2.41132500  |
| C  | 2.54771300  | -1.46867800 | 2.96716300  |
| H  | 2.94950800  | -1.98409700 | 3.85104300  |
| H  | 2.51636800  | -0.39868600 | 3.19400700  |
| H  | 1.51338000  | -1.79657400 | 2.82733100  |
| C  | 2.21724500  | -3.97257100 | 1.01314700  |
| H  | 1.96240600  | -4.41525800 | 0.04486900  |
| H  | 2.59915000  | -4.78033500 | 1.65360200  |
| H  | 1.28899400  | -3.60640000 | 1.46290400  |
| C  | -4.11267300 | -1.32521600 | -0.31450600 |
| S  | -3.50592100 | 2.41738100  | -0.46406700 |
| O  | -4.68525700 | 3.12646200  | -0.93490300 |
| O  | -2.75563600 | 2.80806600  | 0.72179100  |
| N  | -3.87260800 | 0.78008300  | -0.31003700 |

|   |             |             |             |
|---|-------------|-------------|-------------|
| C | -3.25855600 | -0.28440200 | 0.54705400  |
| H | -2.18750700 | -0.37997100 | 0.34738800  |
| C | -3.49704100 | -0.16819000 | 2.02988500  |
| C | -2.56960300 | -0.76270000 | 2.89744800  |
| C | -4.61312300 | 0.48251500  | 2.57209300  |
| C | -2.76919400 | -0.73101200 | 4.27876300  |
| H | -1.67486900 | -1.22054400 | 2.48288000  |
| C | -4.80744000 | 0.52085900  | 3.95286400  |
| H | -5.32373300 | 0.97588700  | 1.91509200  |
| C | -3.89080100 | -0.09214100 | 4.81020800  |
| H | -2.04050100 | -1.19401500 | 4.93895900  |
| H | -5.67412100 | 1.03536000  | 4.35903500  |
| H | -4.04375400 | -0.06036900 | 5.88560600  |
| C | -4.56100200 | -0.11567800 | -1.15989600 |
| O | -5.21686400 | 0.06256800  | -2.15043500 |
| C | -2.28955900 | 2.39702200  | -1.89012200 |
| F | -1.27709500 | 1.57887500  | -1.59926900 |
| F | -1.82749300 | 3.63404900  | -2.07412000 |
| F | -2.89800800 | 1.97438700  | -2.99660700 |
| C | -3.28712000 | -2.36196500 | -1.06307400 |
| C | -3.46192400 | -2.58839600 | -2.43477700 |
| C | -2.37569100 | -3.16050700 | -0.35622200 |
| C | -2.73231000 | -3.58624700 | -3.08565000 |
| H | -4.16909500 | -1.98364600 | -2.99318500 |
| C | -1.65140200 | -4.15991500 | -1.00647400 |
| H | -2.23263900 | -3.00165800 | 0.70939900  |
| C | -1.82603700 | -4.37475900 | -2.37622000 |
| H | -2.87673900 | -3.74565600 | -4.15088800 |
| H | -0.95241900 | -4.77133000 | -0.44164300 |
| H | -1.26277500 | -5.15345500 | -2.88355600 |
| C | -5.29717600 | -1.99027300 | 0.40492000  |
| H | -4.93524500 | -2.72416900 | 1.13196500  |
| H | -5.91912000 | -1.26283400 | 0.93360600  |
| H | -5.91815100 | -2.51057400 | -0.33088400 |

H C O N F S 0

6-31G\*

\*\*\*\*

Fe 0

LANL2DZ

\*\*\*\*

Fe 0

LANL2DZ
